# Supplementary material for: Synthesis of the hyper-branched core tetrasaccharide motif of chloroviruses
Source: Royal Society of Chemistry journal article supplement (doi:10.1039/d0ob02176h), 2021-01-01

## Supporting Information

### Synthesis of the Hyper-Branched Core Tetrasaccharide Motif of Chloroviruses

Bijoyananda Mishra, Sujit Manmode, Gulab Walke, Saptashwa Chakraborty, Mahesh Neralkar and Srinivas Hotha\*

Department of Chemistry, Indian Institute of Science Education and Research

Pune – 411 008, India

*s.hotha@iiserpune.ac.in*

### Contents

| Description                                                                 | Page Number |
|-----------------------------------------------------------------------------|-------------|
| <sup>1</sup> H, <sup>13</sup> C and DEPT NMR spectra of compound <b>7</b>   | S2-S4       |
| <sup>1</sup> H, <sup>13</sup> C and DEPT NMR spectra of compound <b>8</b>   | S5-S7       |
| <sup>1</sup> H, <sup>13</sup> C and DEPT NMR spectra of compound <b>9</b>   | S8-S10      |
| <sup>1</sup> H, <sup>13</sup> C and DEPT NMR spectra of compound <b>10</b>  | S11-S13     |
| <sup>1</sup> H, <sup>13</sup> C and DEPT NMR spectra of compound <b>3</b>   | S14-S16     |
| <sup>1</sup> H, <sup>13</sup> C and DEPT NMR spectra of compound <b>11</b>  | S17-S19     |
| <sup>1</sup> H, <sup>13</sup> C and DEPT NMR spectra of compound <b>4</b>   | S20-S22     |
| <sup>1</sup> H, <sup>13</sup> C and DEPT NMR spectra of compound <b>13</b>  | S23-S25     |
| <sup>1</sup> H, <sup>13</sup> C and DEPT NMR spectra of compound <b>14</b>  | S26-S28     |
| <sup>1</sup> H, <sup>13</sup> C and DEPT NMR spectra of compound <b>15</b>  | S29-S31     |
| <sup>1</sup> H, <sup>13</sup> C and DEPT NMR spectra of compound <b>5</b>   | S32-S34     |
| <sup>1</sup> H, <sup>13</sup> C and DEPT NMR spectra of compound <b>6aβ</b> | S35-S37     |
| <sup>1</sup> H, <sup>13</sup> C and DEPT NMR spectra of compound <b>6aα</b> | S38-S40     |
| <sup>1</sup> H, <sup>13</sup> C and DEPT NMR spectra of compound <b>6b</b>  | S41-S43     |
| <sup>1</sup> H, <sup>13</sup> C and DEPT NMR spectra of compound <b>6c</b>  | S44-S46     |
| <sup>1</sup> H, <sup>13</sup> C and DEPT NMR spectra of compound <b>6d</b>  | S47-S49     |
| <sup>1</sup> H, <sup>13</sup> C and DEPT NMR spectra of compound <b>6e</b>  | S50-S52     |
| <sup>1</sup> H, <sup>13</sup> C and DEPT NMR spectra of compound <b>6f</b>  | S53-S55     |
| <sup>1</sup> H, <sup>13</sup> C and DEPT NMR spectra of compound <b>6g</b>  | S56-S58     |
| <sup>1</sup> H, <sup>13</sup> C and DEPT NMR spectra of compound <b>19</b>  | S59-S61     |
| <sup>1</sup> H, <sup>13</sup> C and DEPT NMR spectra of compound <b>20</b>  | S62-S64     |
| <sup>1</sup> H, <sup>13</sup> C and DEPT NMR spectra of compound <b>21</b>  | S65-S67     |
| <sup>1</sup> H, <sup>13</sup> C and DEPT NMR spectra of compound <b>22</b>  | S68-S70     |
| <sup>1</sup> H, <sup>13</sup> C and DEPT NMR spectra of compound <b>23</b>  | S71-S73     |
| <sup>1</sup> H, <sup>13</sup> C and DEPT NMR spectra of compound <b>2</b>   | S74-S76     |
| <sup>1</sup> H, <sup>13</sup> C and DEPT NMR spectra of compound <b>24</b>  | S77-S79     |
| <sup>1</sup> H, <sup>13</sup> C and DEPT NMR spectra of compound <b>25</b>  | S80-S82     |
| <sup>1</sup> H, <sup>13</sup> C and DEPT NMR spectra of compound <b>26</b>  | S83-S85     |

$^1\text{H}$  NMR Spectrum (400.31 MHz,  $\text{CDCl}_3$ ) of compound **7**

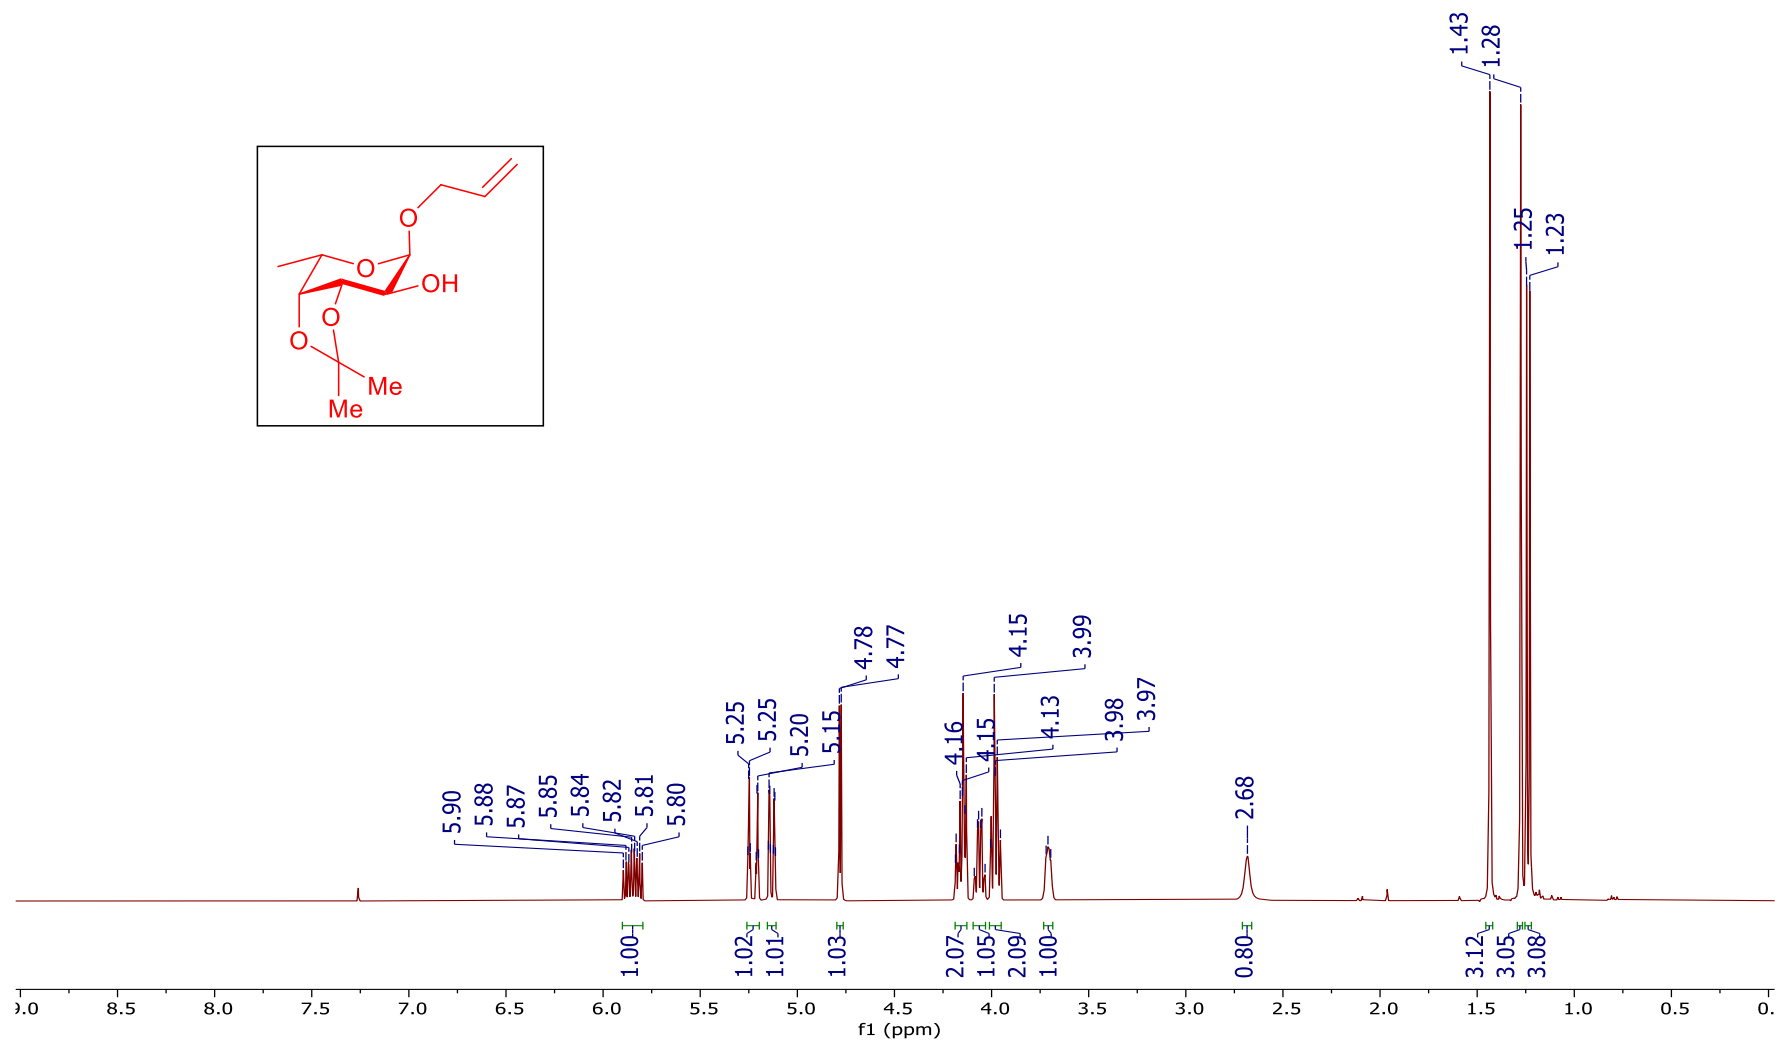

$^{13}\text{C}$  NMR Spectrum (100.67MHz,  $\text{CDCl}_3$ ) of compound **7**

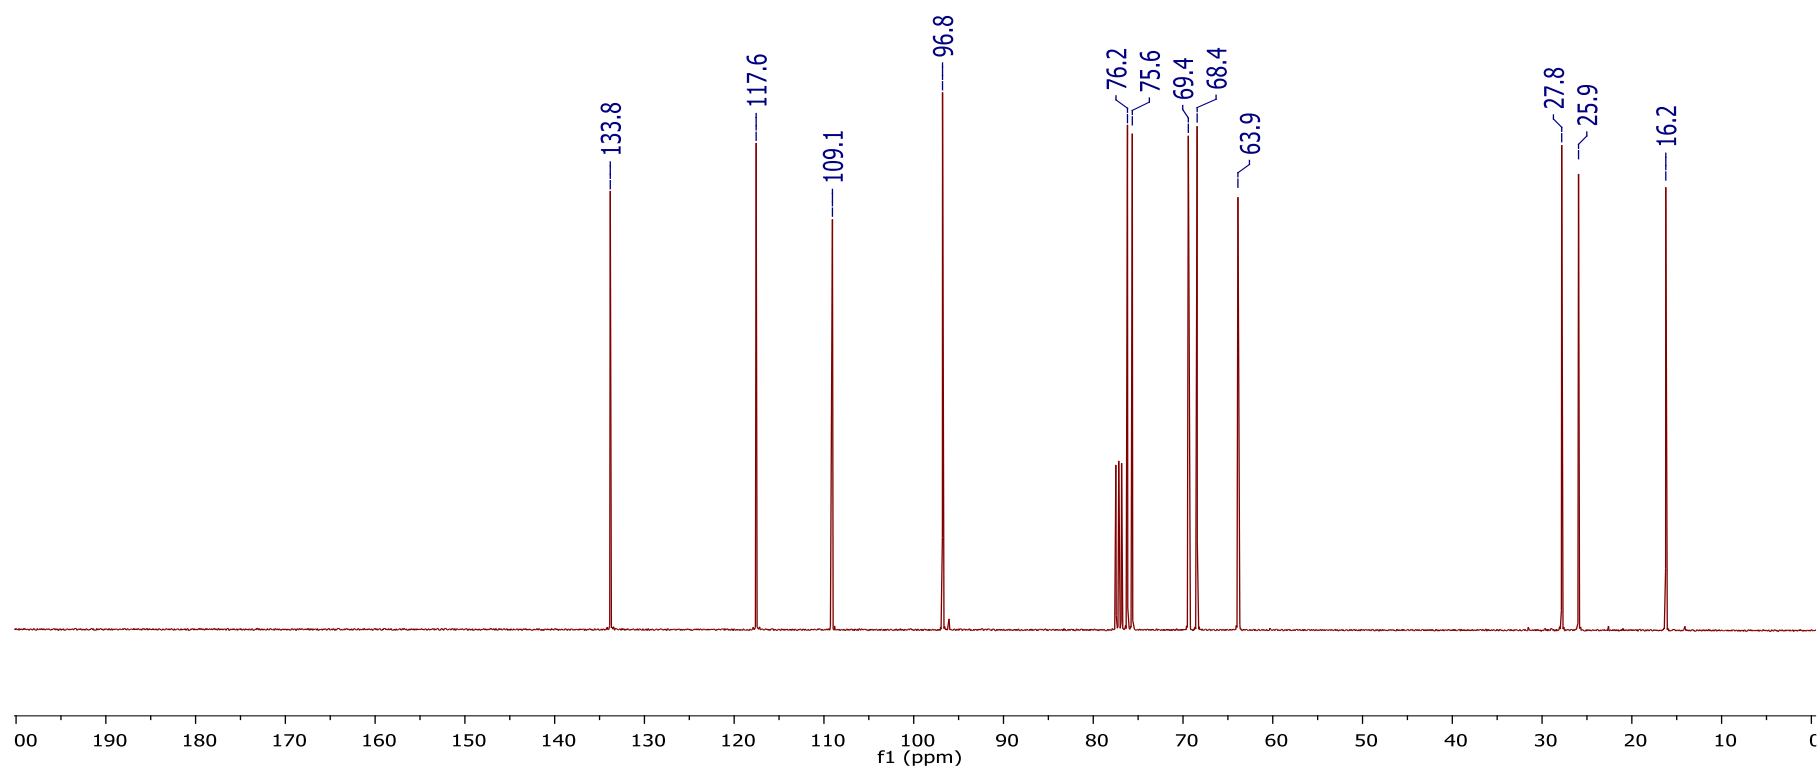

DEPT NMR Spectrum (100.67MHz, CDCl<sub>3</sub>) of compound **7**

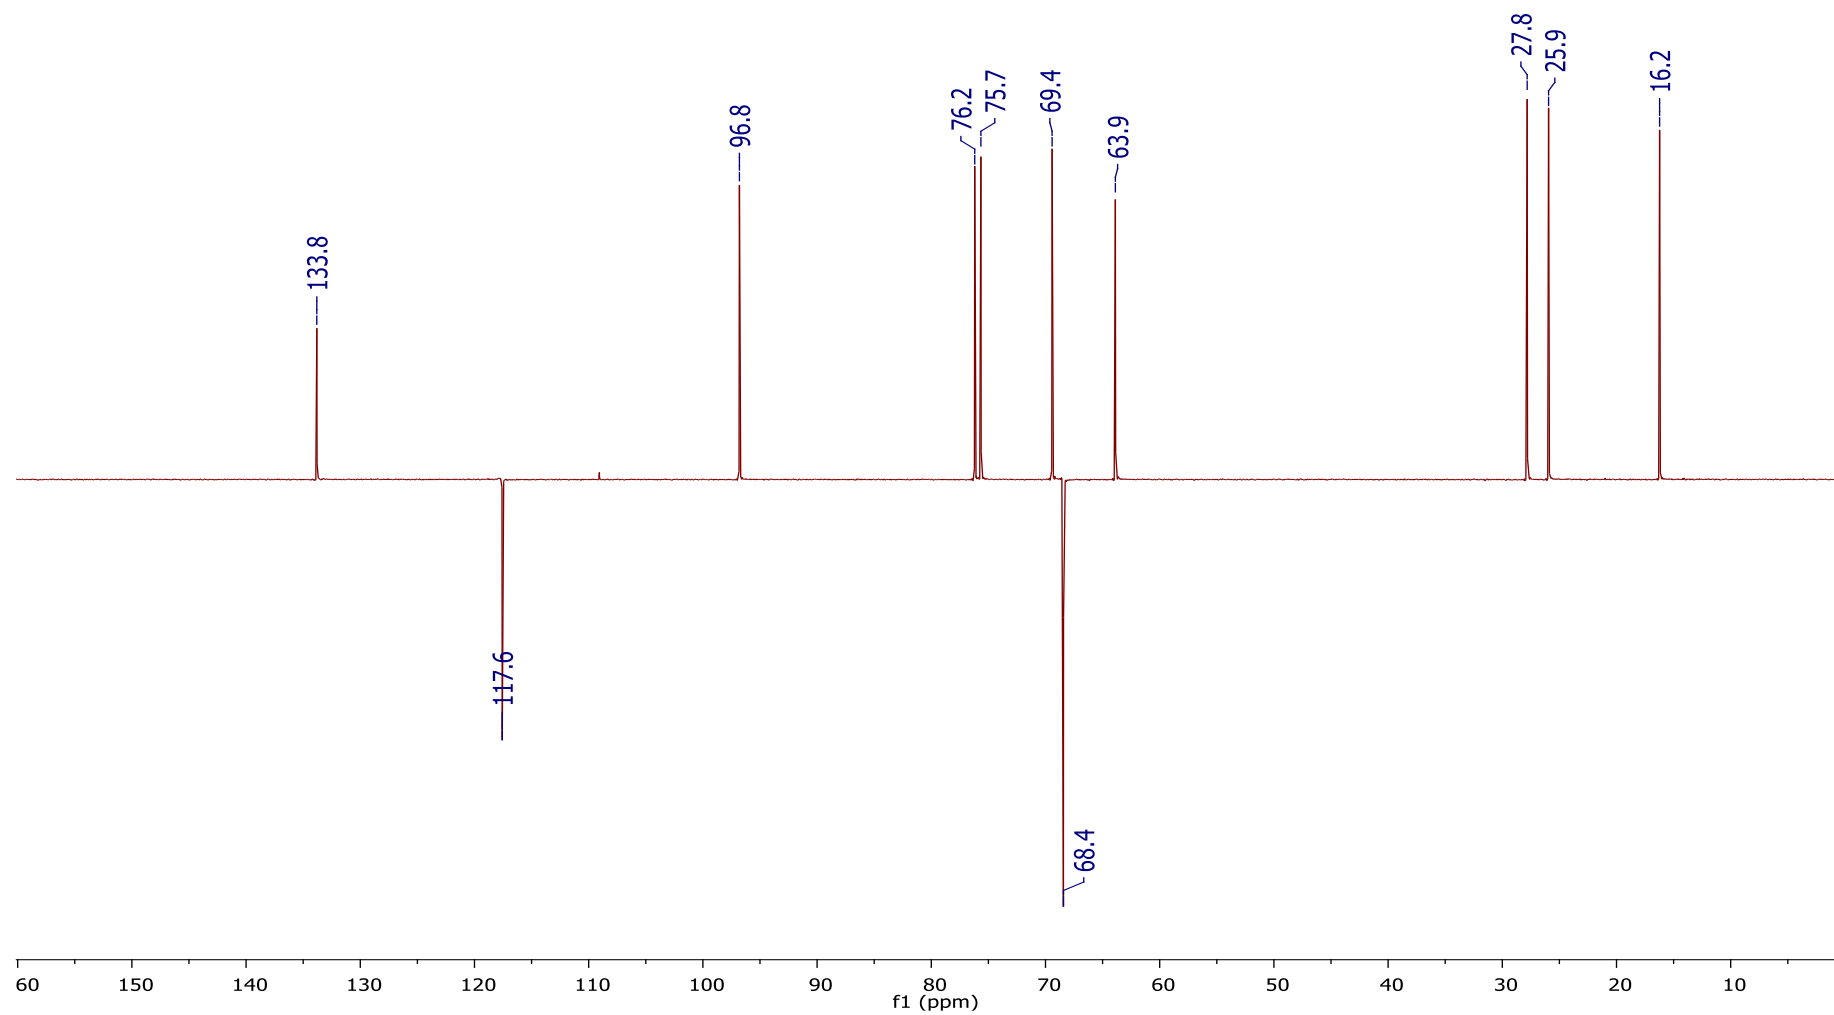

$^1\text{H}$  NMR Spectrum (400.31 MHz,  $\text{CDCl}_3$ ) of compound **8**

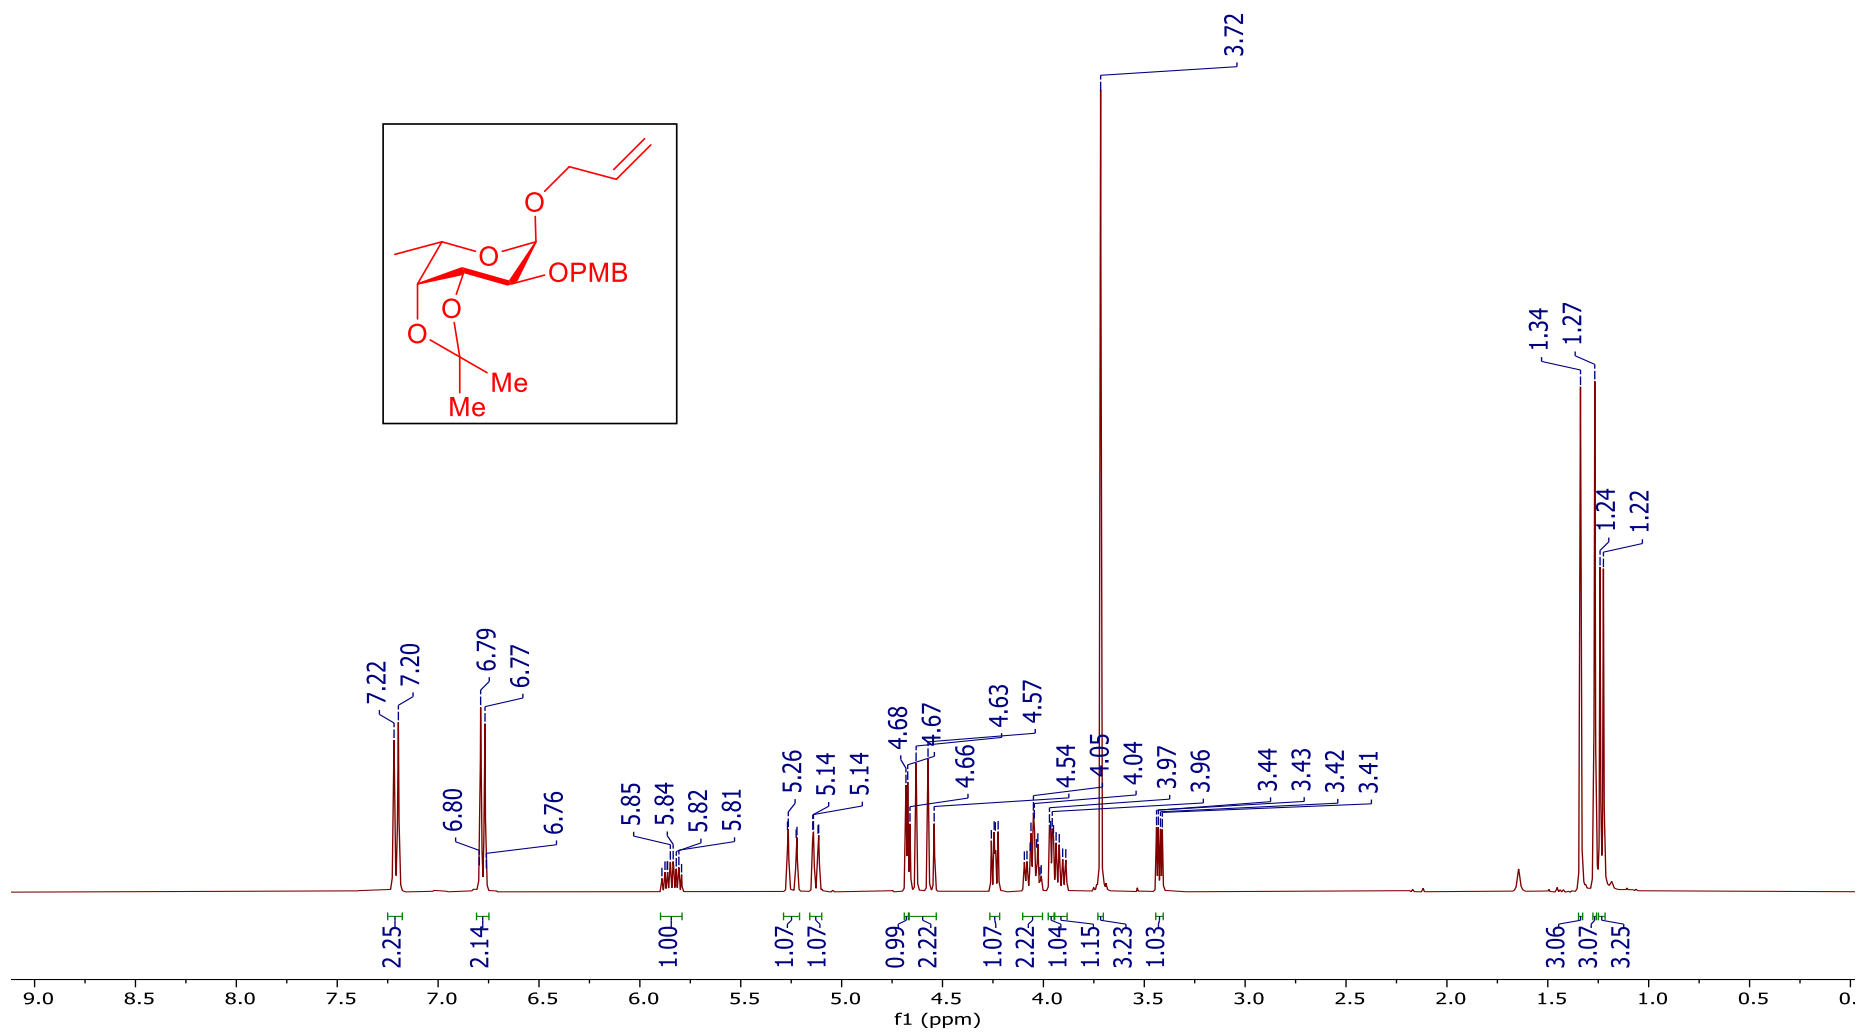

$^{13}\text{C}$  NMR Spectrum (100.67MHz,  $\text{CDCl}_3$ ) of compound **8**

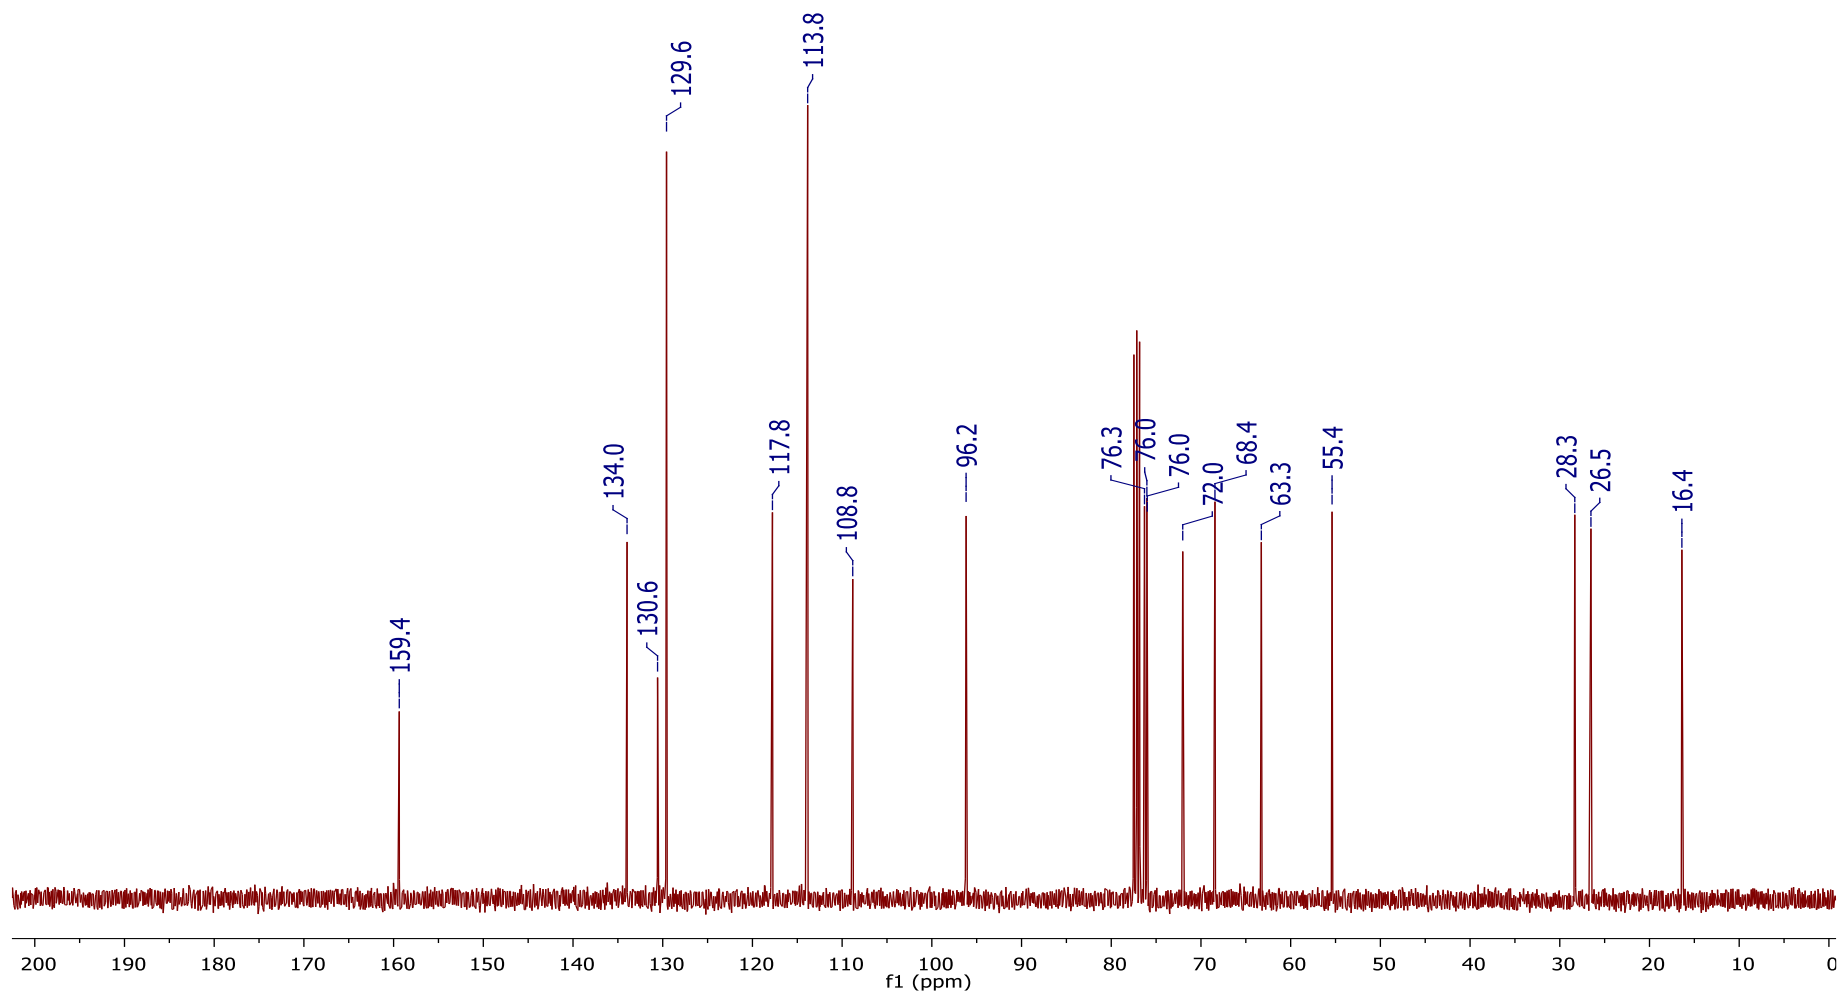

DEPT NMR Spectrum (100.67MHz, CDCl<sub>3</sub>) of compound **8**

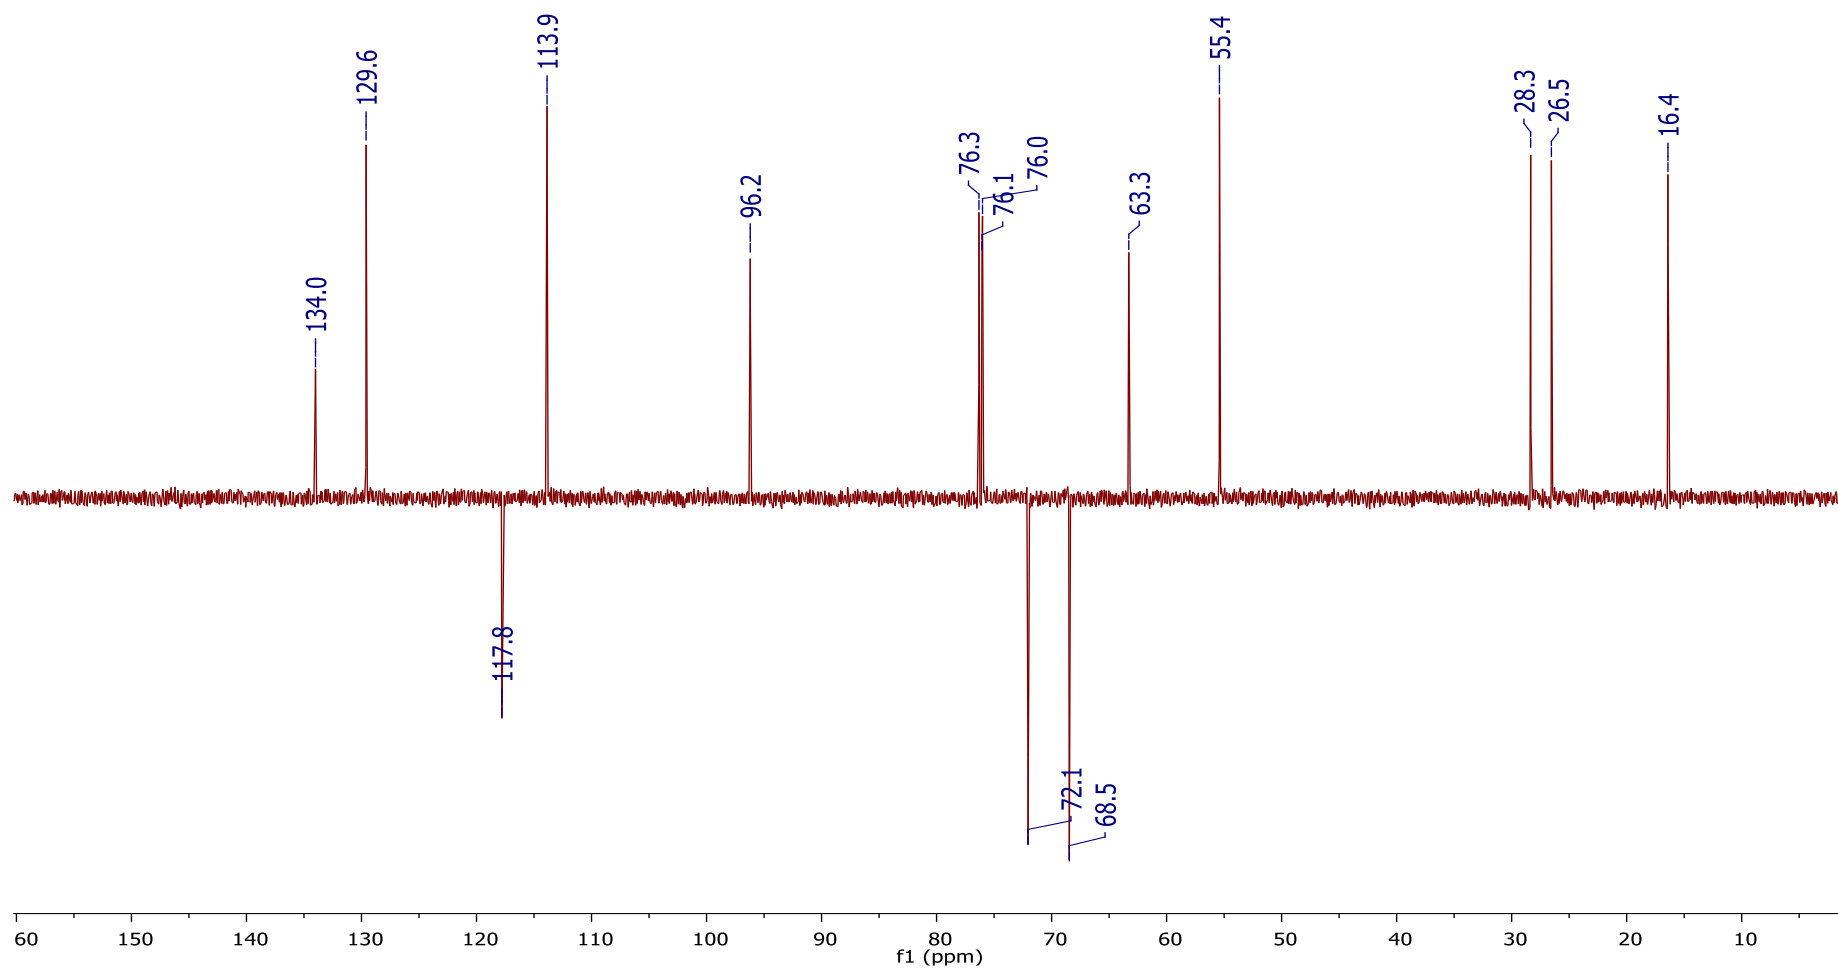

<sup>1</sup>H NMR Spectrum (400.31 MHz, CDCl<sub>3</sub>) of compound **9**

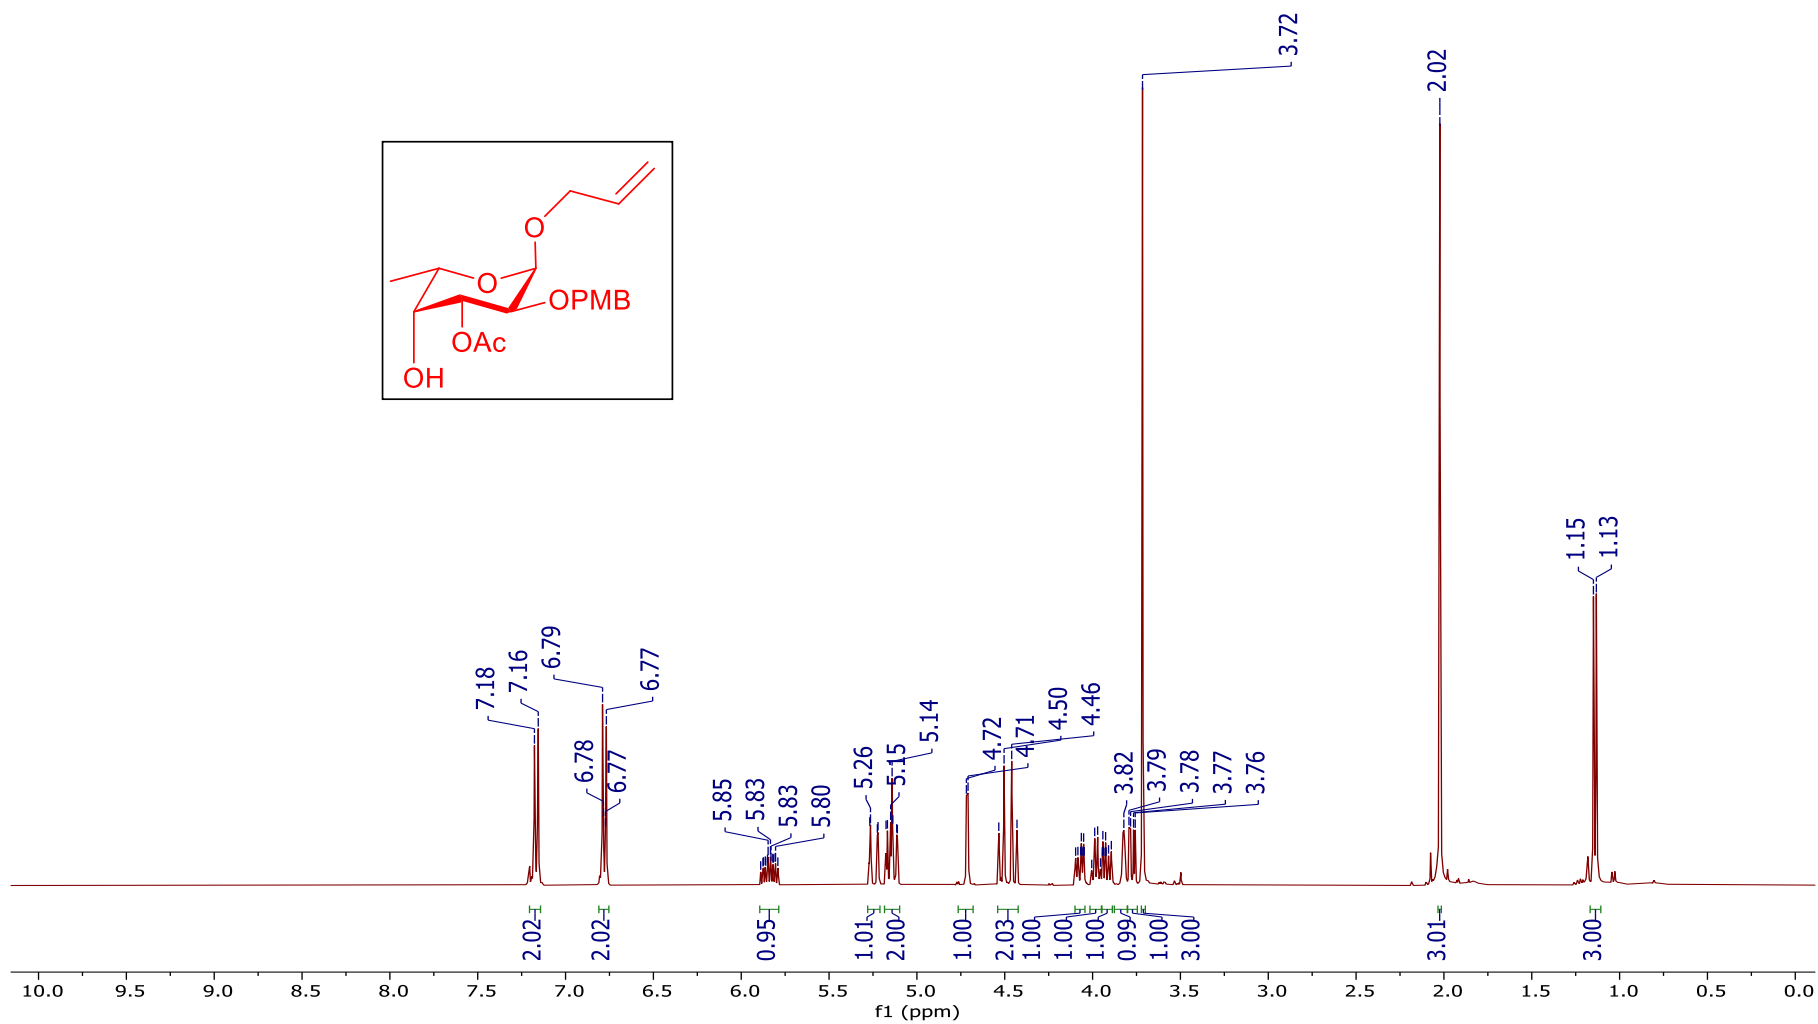



$^{13}\text{C}$  NMR Spectrum (100.67MHz,  $\text{CDCl}_3$ ) of compound **9**

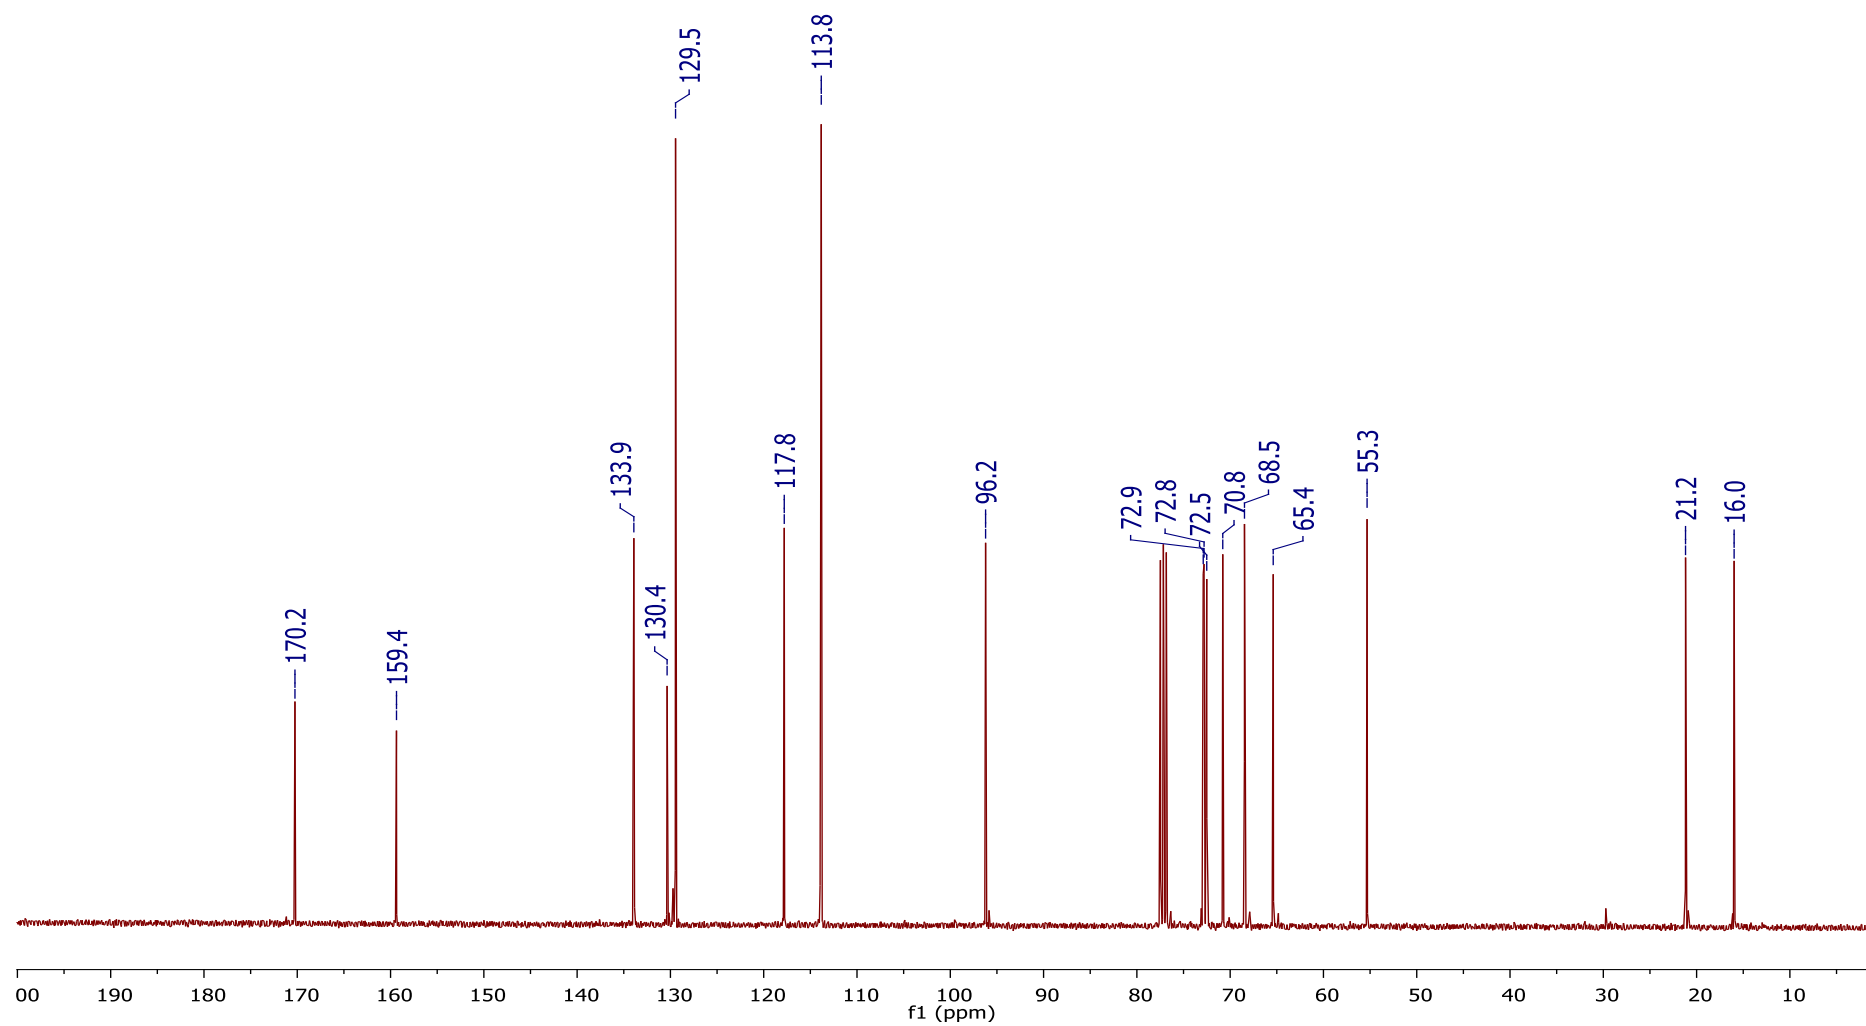

DEPT NMR Spectrum (100.67MHz, CDCl<sub>3</sub>) of compound **9**

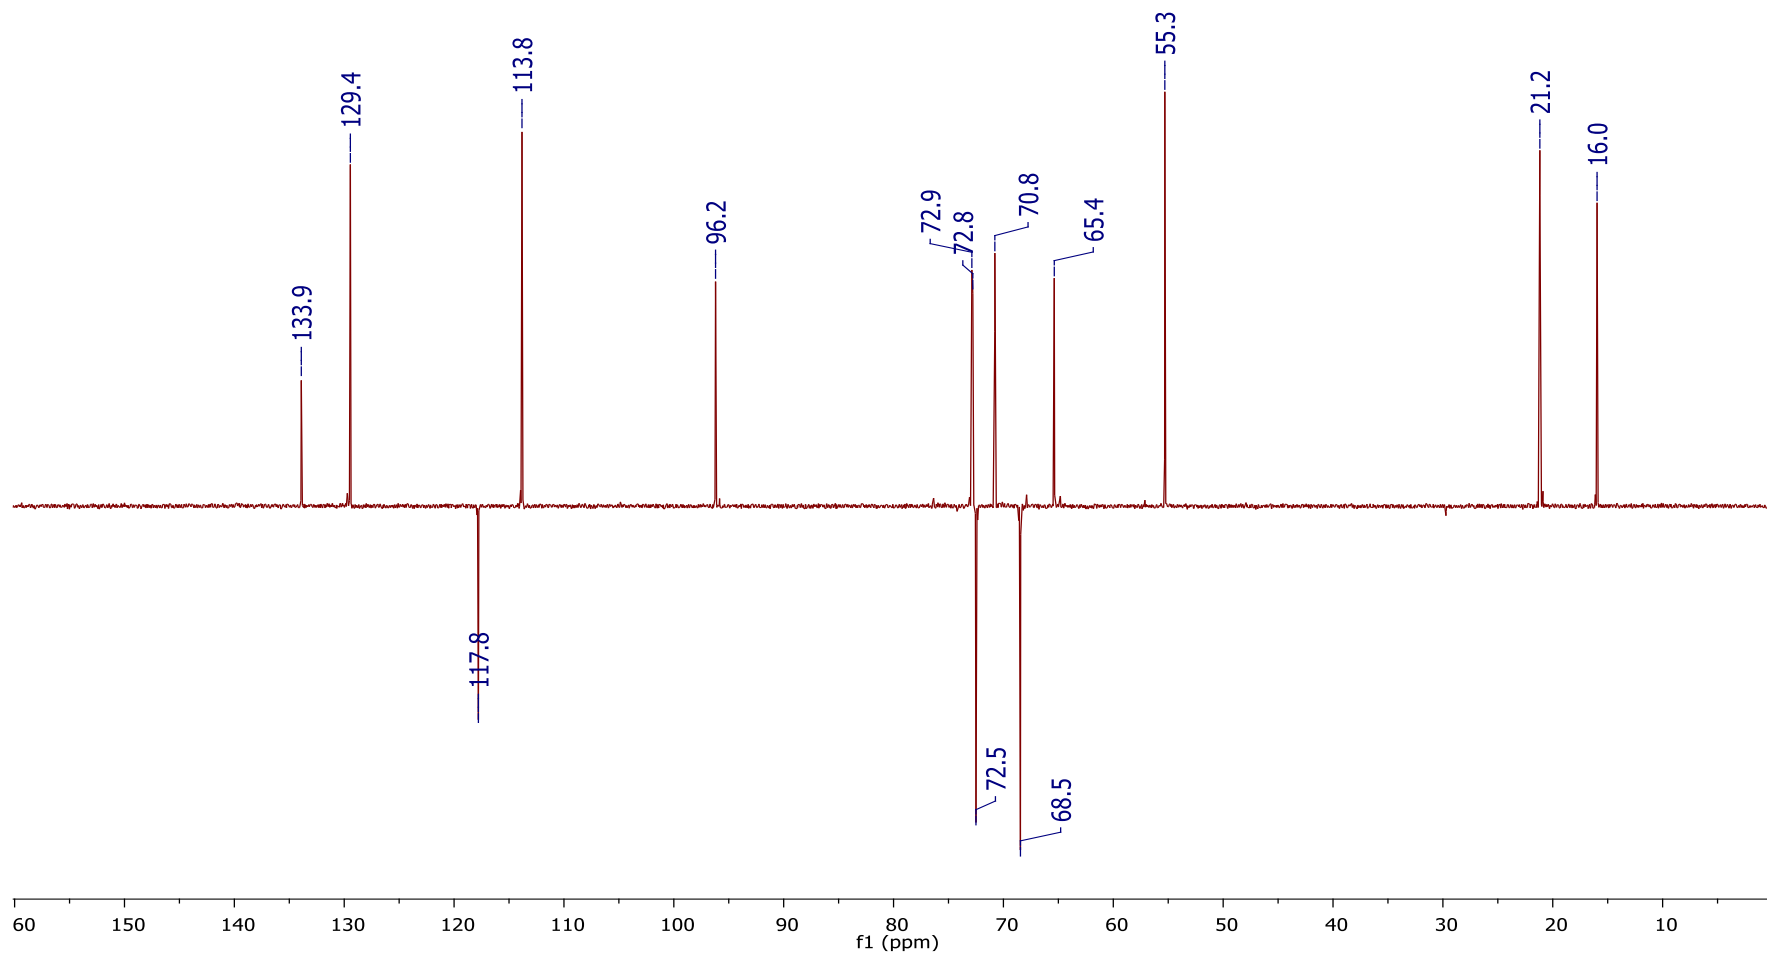

$^1\text{H}$  NMR Spectrum (400.31 MHz,  $\text{CDCl}_3$ ) of compound **10**

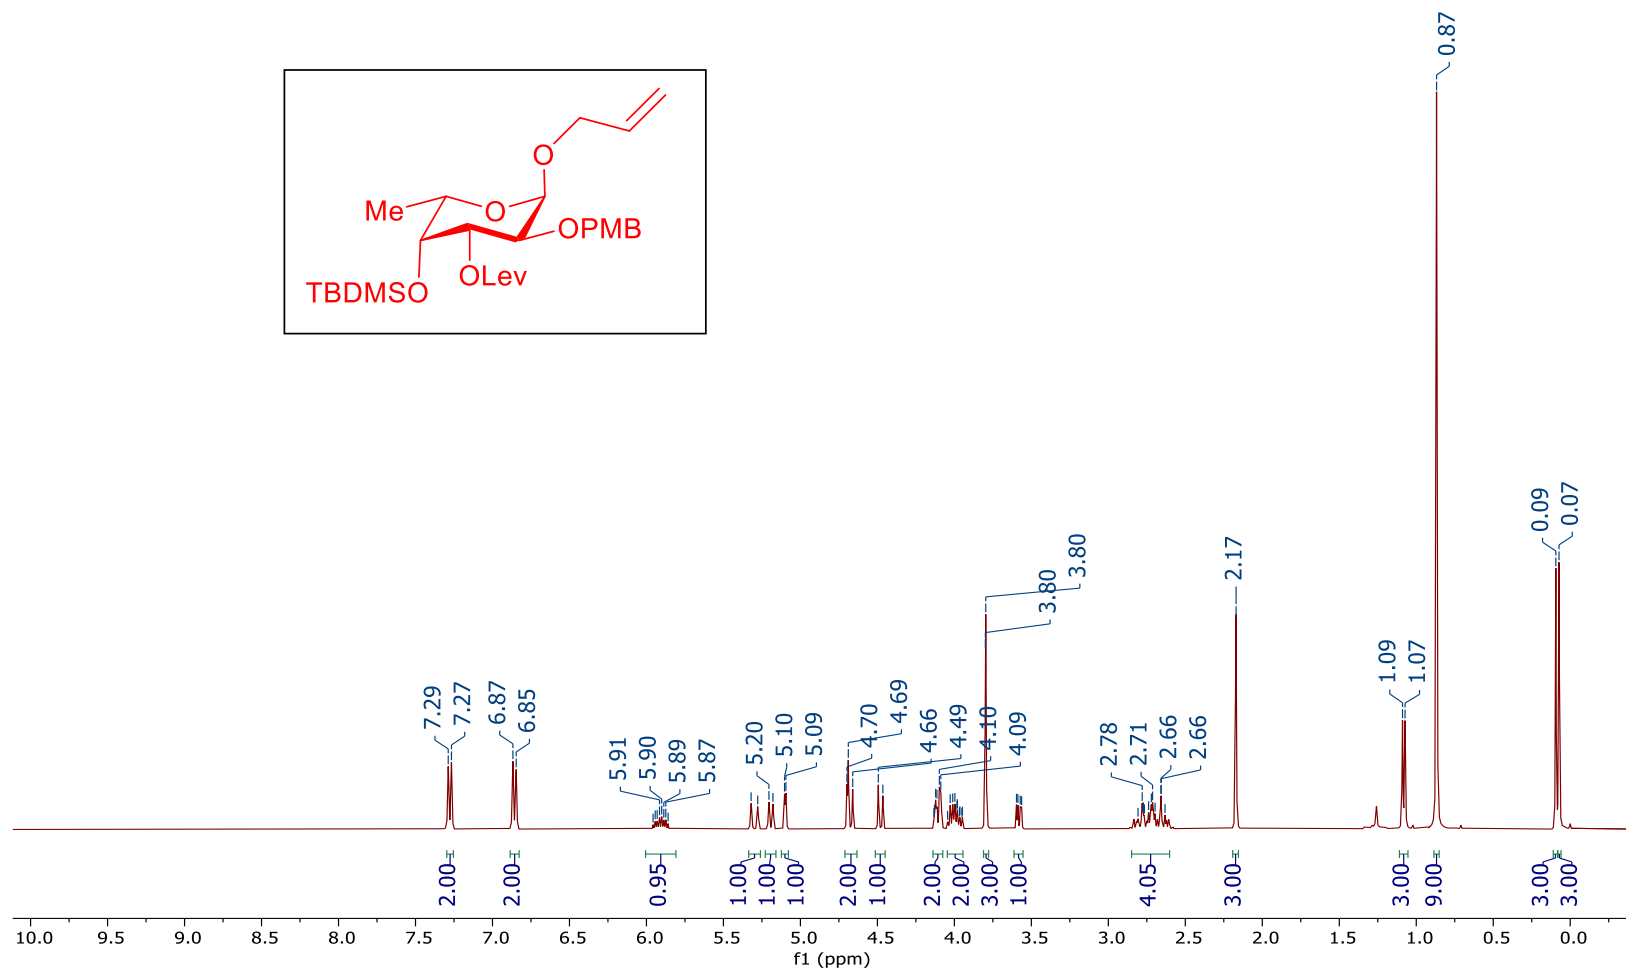

$^{13}\text{C}$  NMR Spectrum (100.67MHz,  $\text{CDCl}_3$ ) of compound **10**

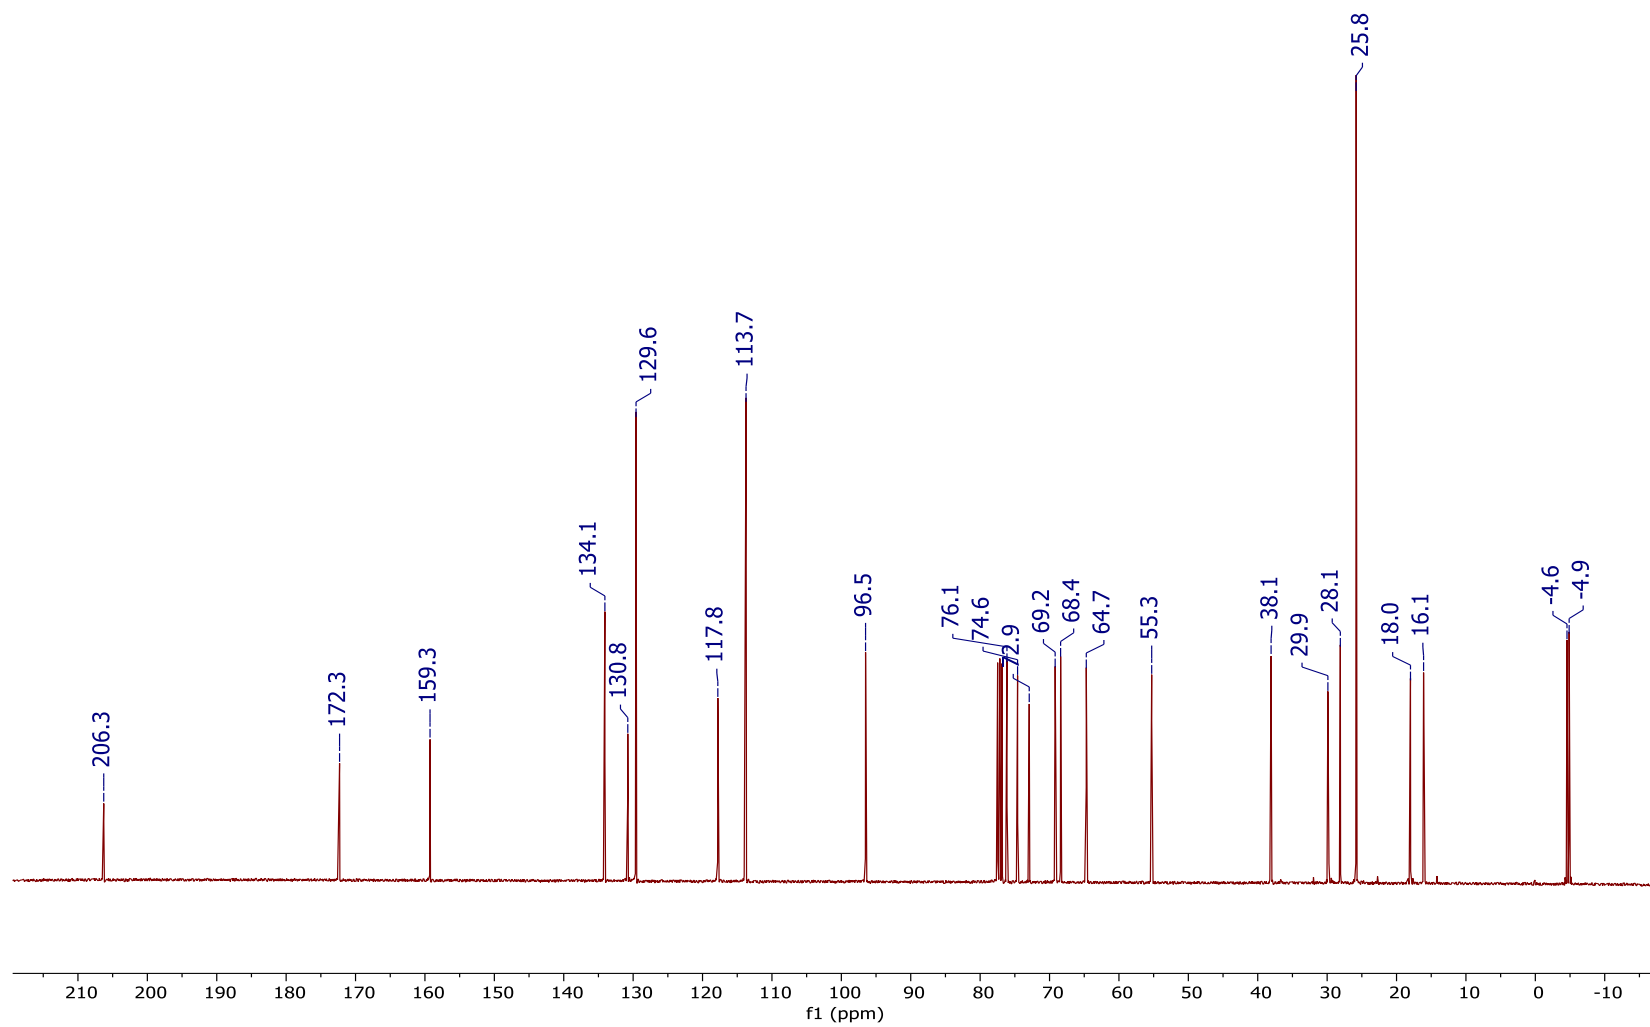

DEPT NMR Spectrum (100.67MHz, CDCl<sub>3</sub>) of compound **10**

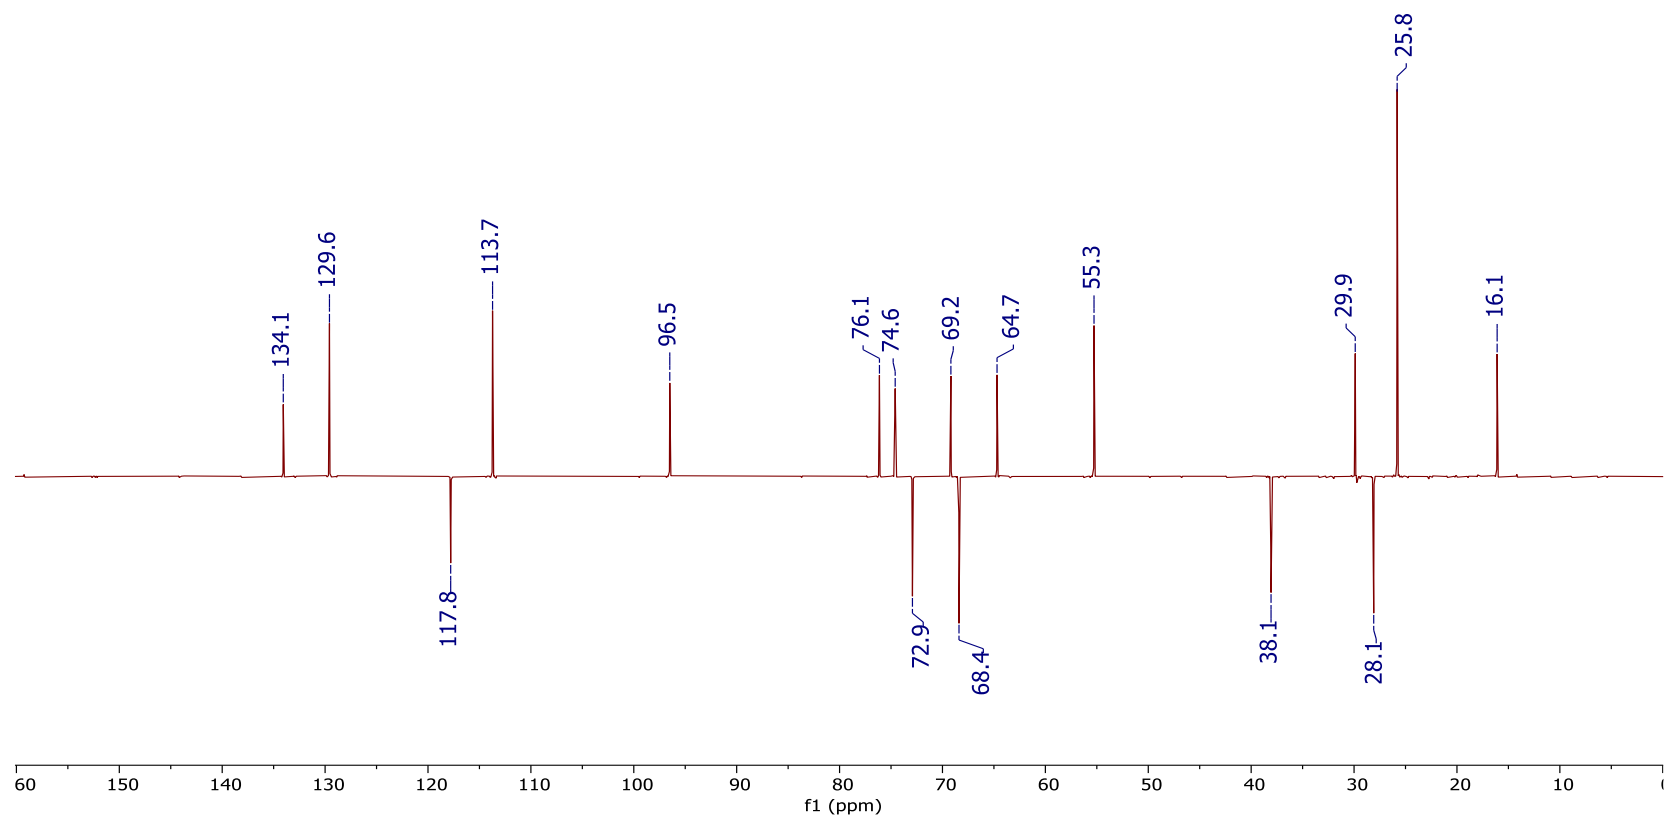

$^1\text{H}$  NMR Spectrum (400.31 MHz,  $\text{CDCl}_3$ ) of compound **3**

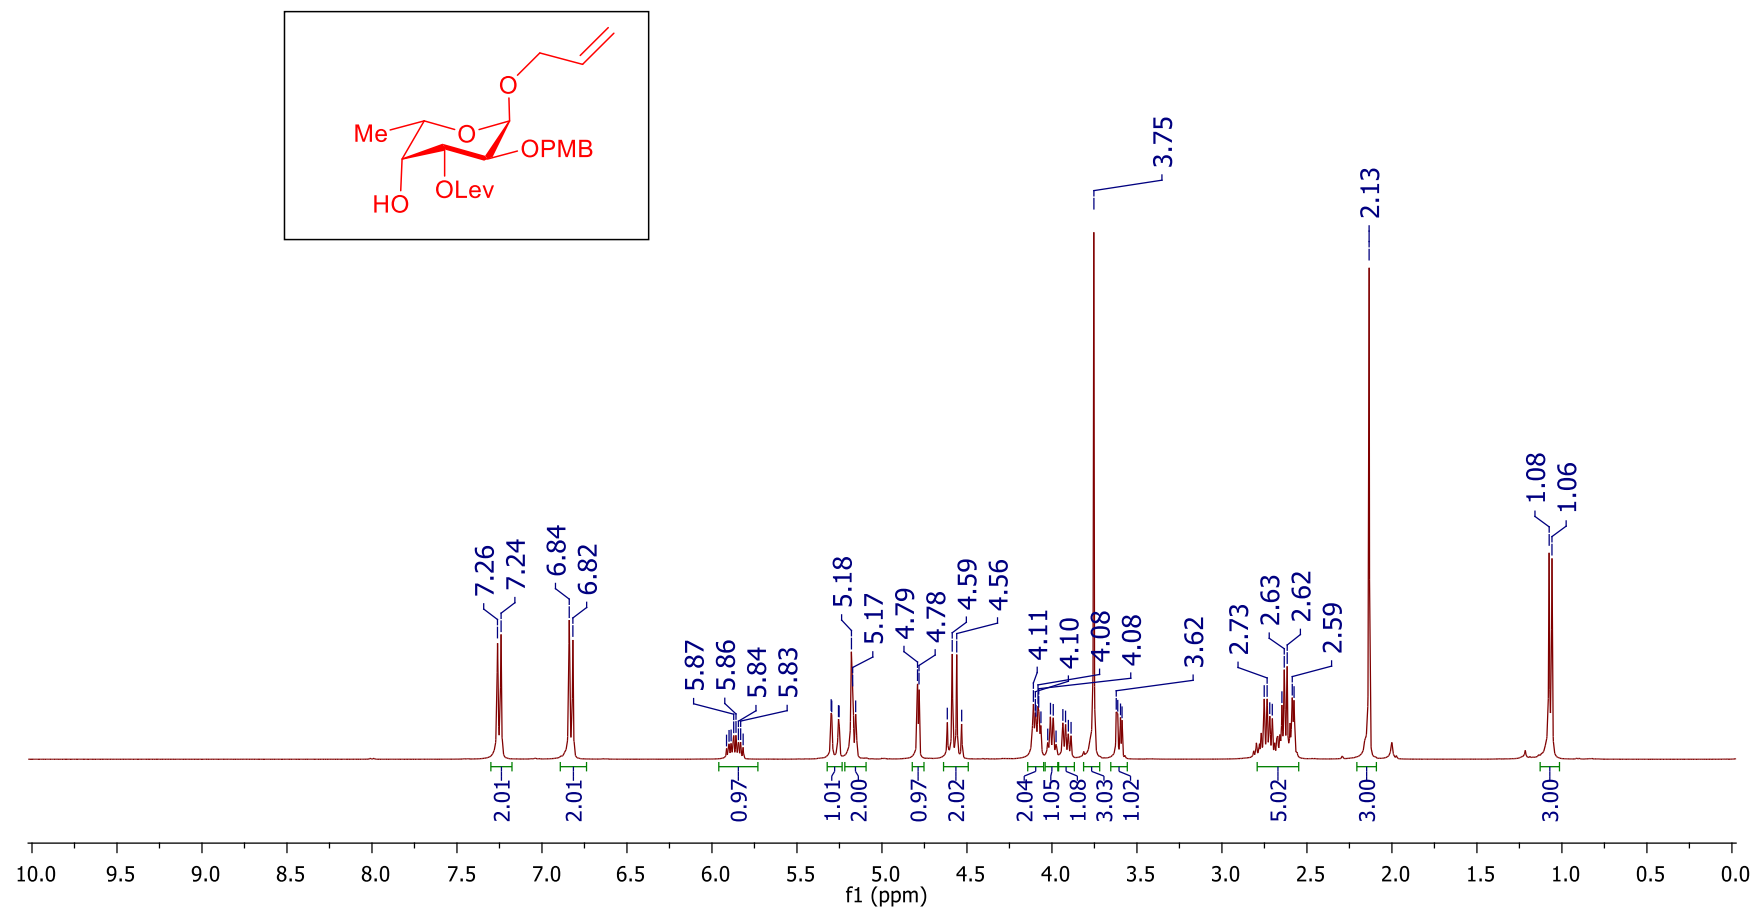

$^{13}\text{C}$  NMR Spectrum (100.67MHz,  $\text{CDCl}_3$ ) of compound **3**

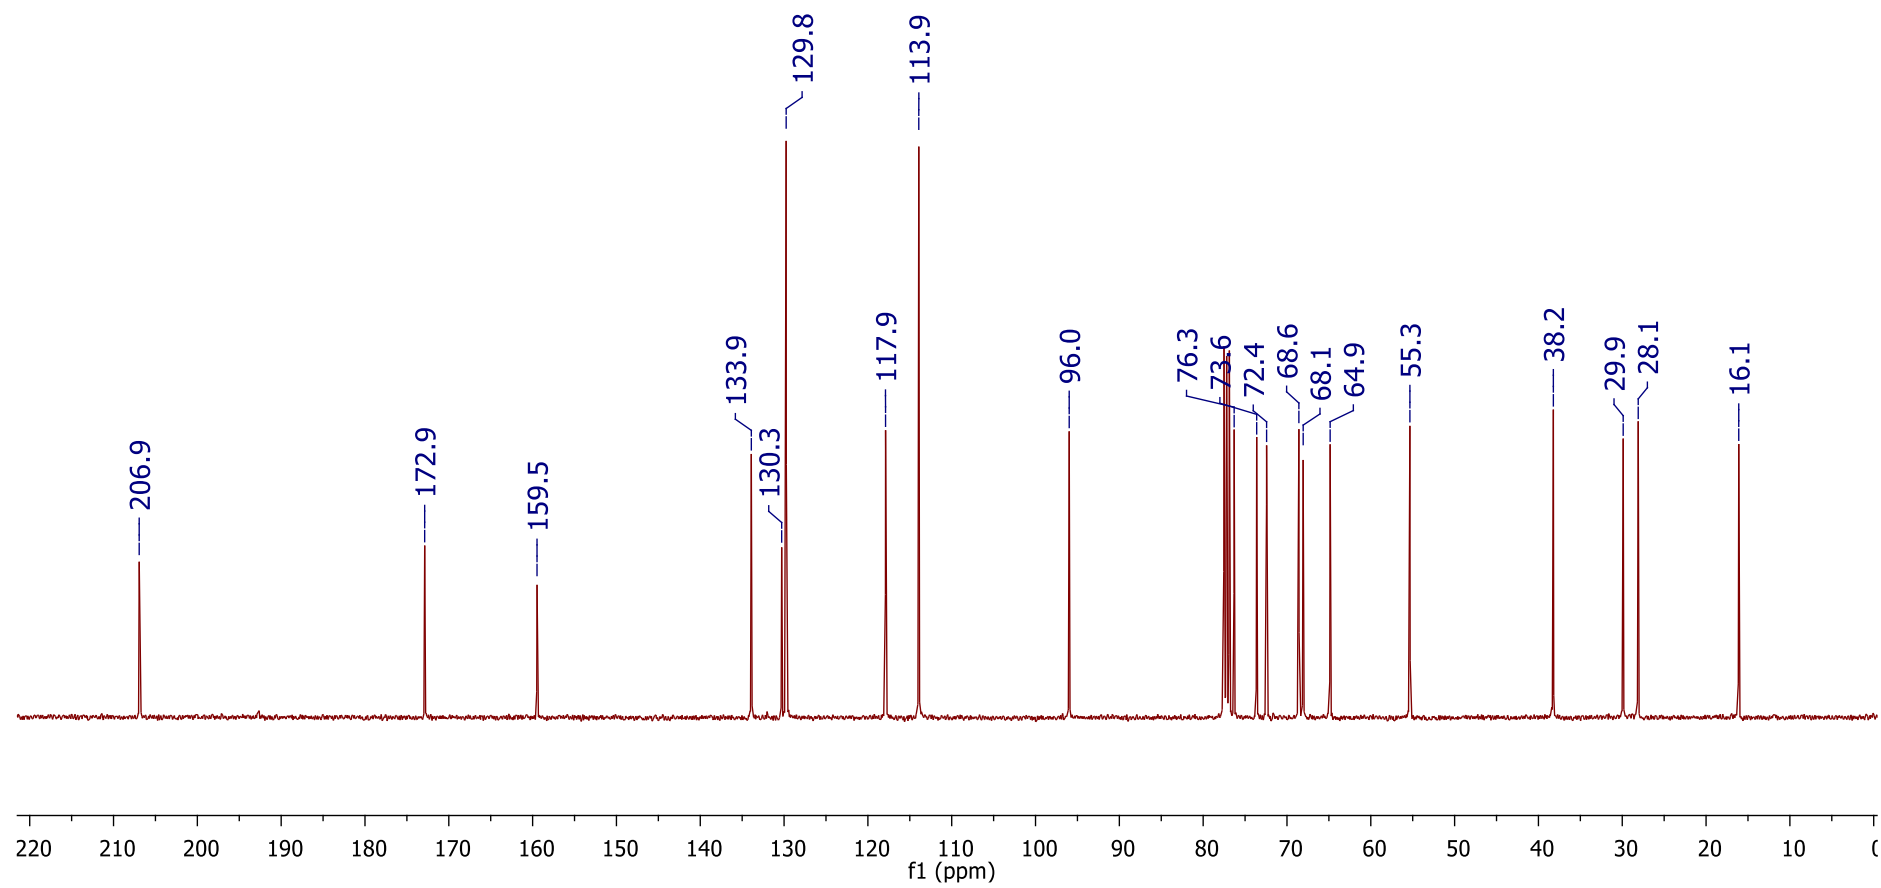

DEPT NMR Spectrum (100.67MHz, CDCl<sub>3</sub>) of compound **3**

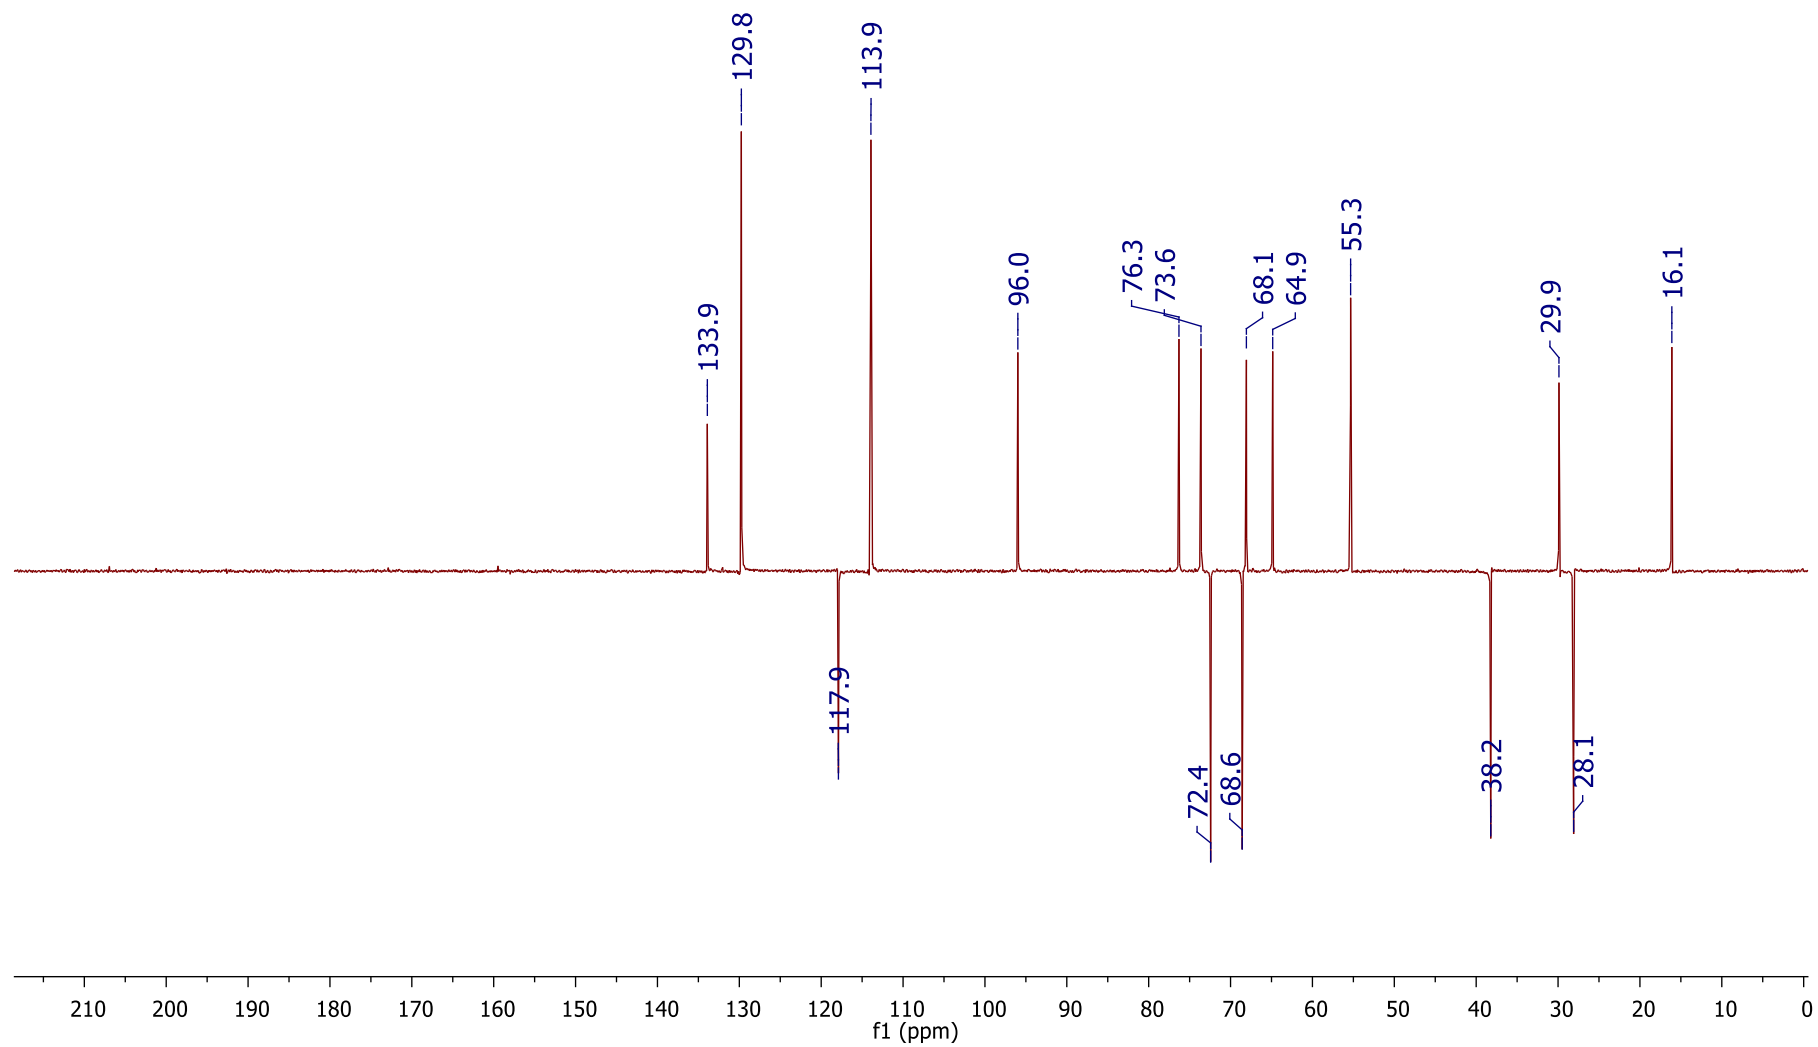



$^1\text{H}$  NMR Spectrum (400.31 MHz,  $\text{CDCl}_3$ ) of compound **11**

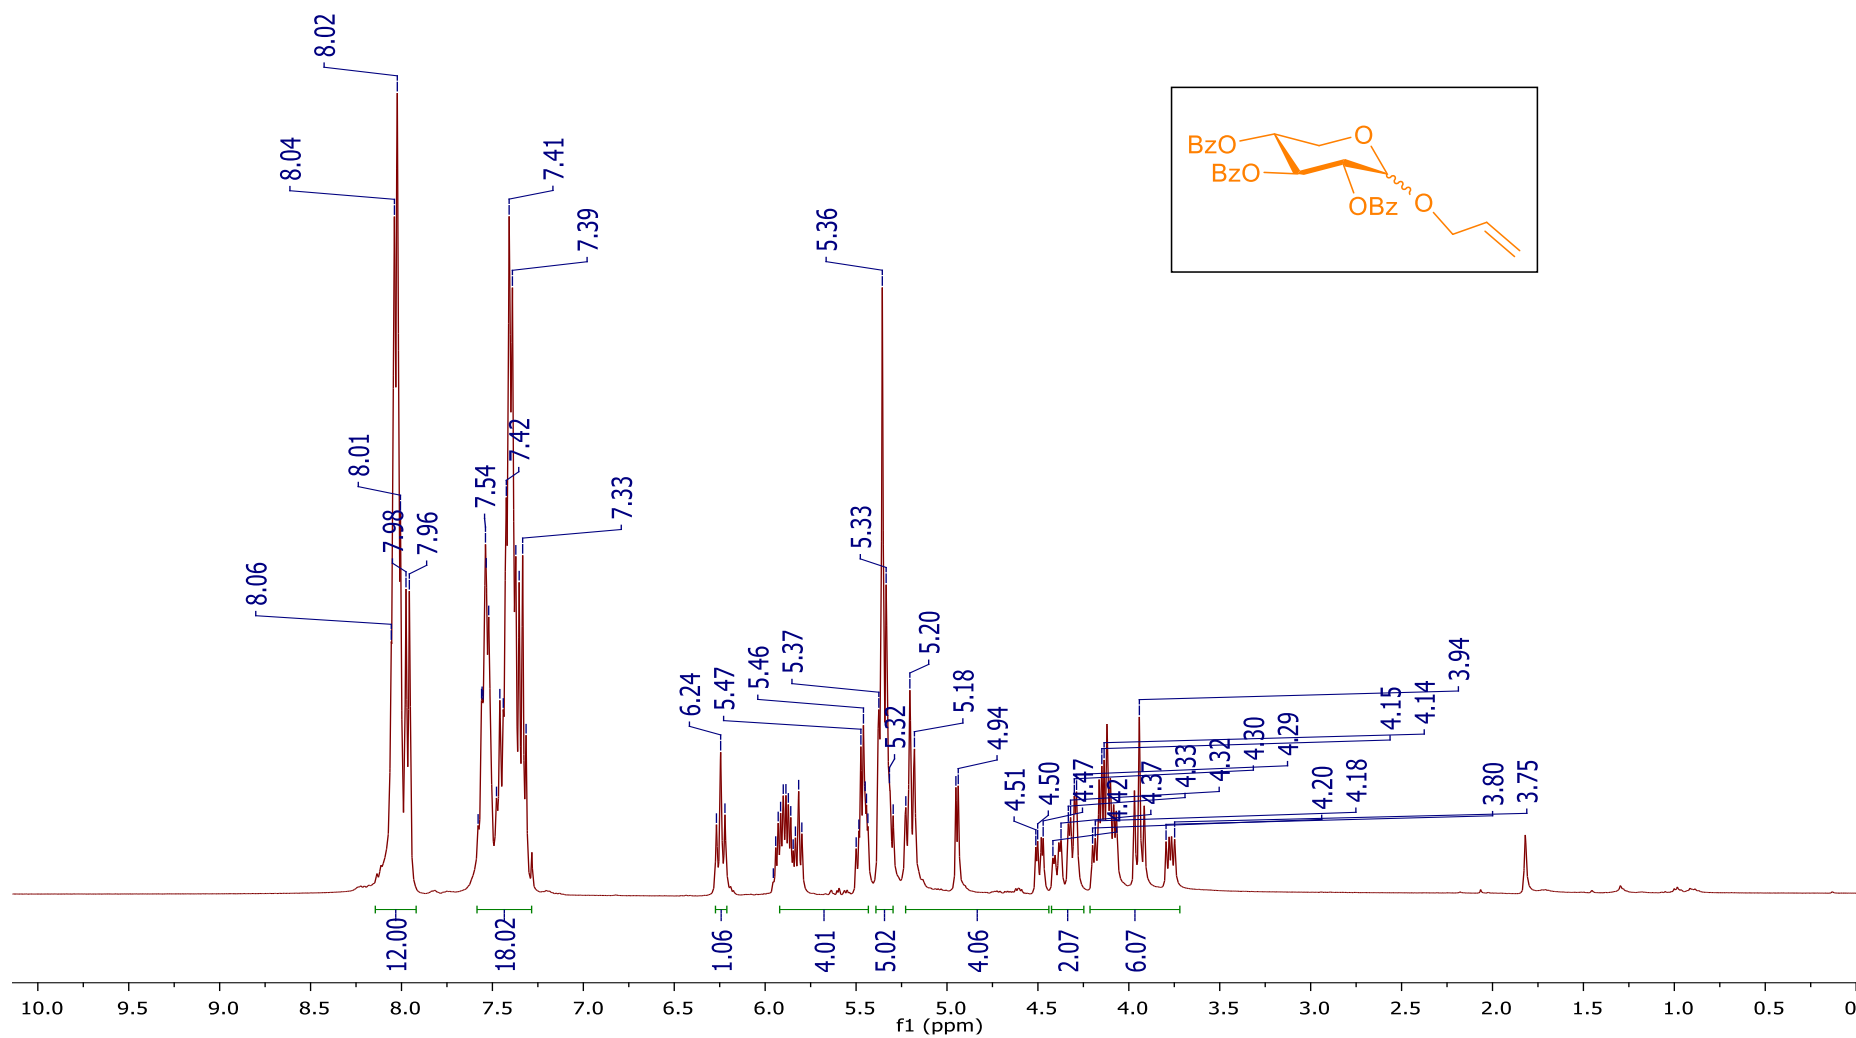

$^{13}\text{C}$  NMR Spectrum (100.67MHz,  $\text{CDCl}_3$ ) of compound **11**

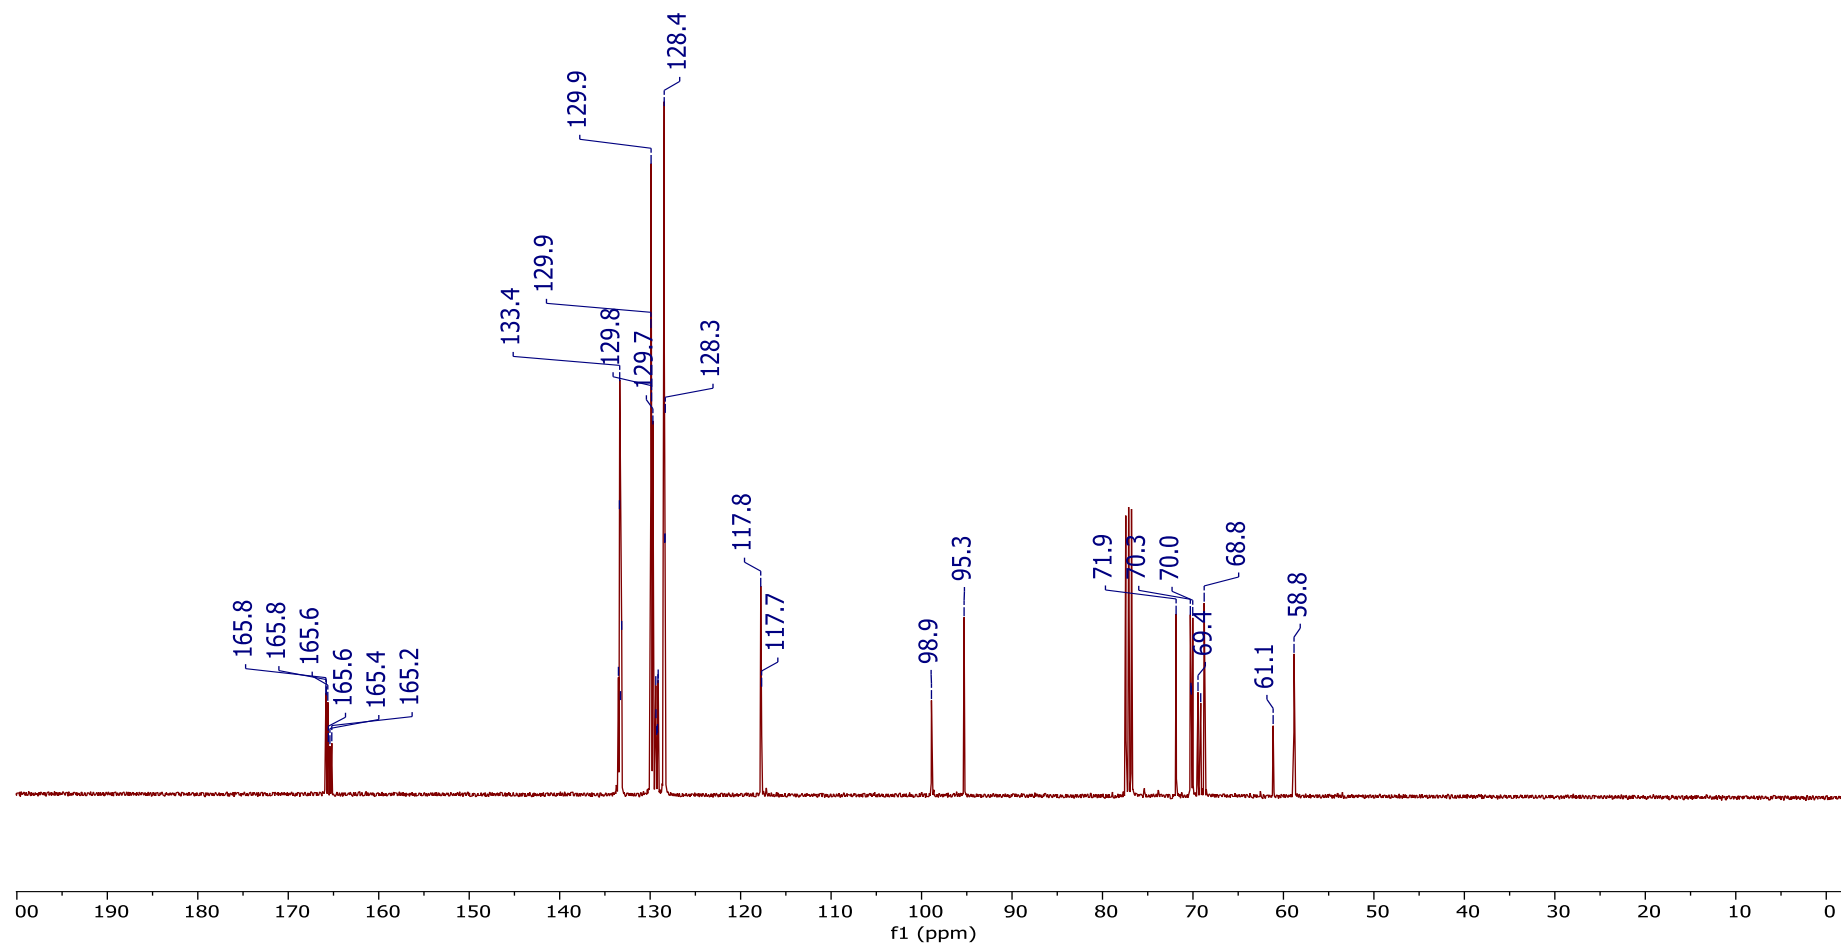

DEPT NMR Spectrum (100.67MHz, CDCl<sub>3</sub>) of compound **11**

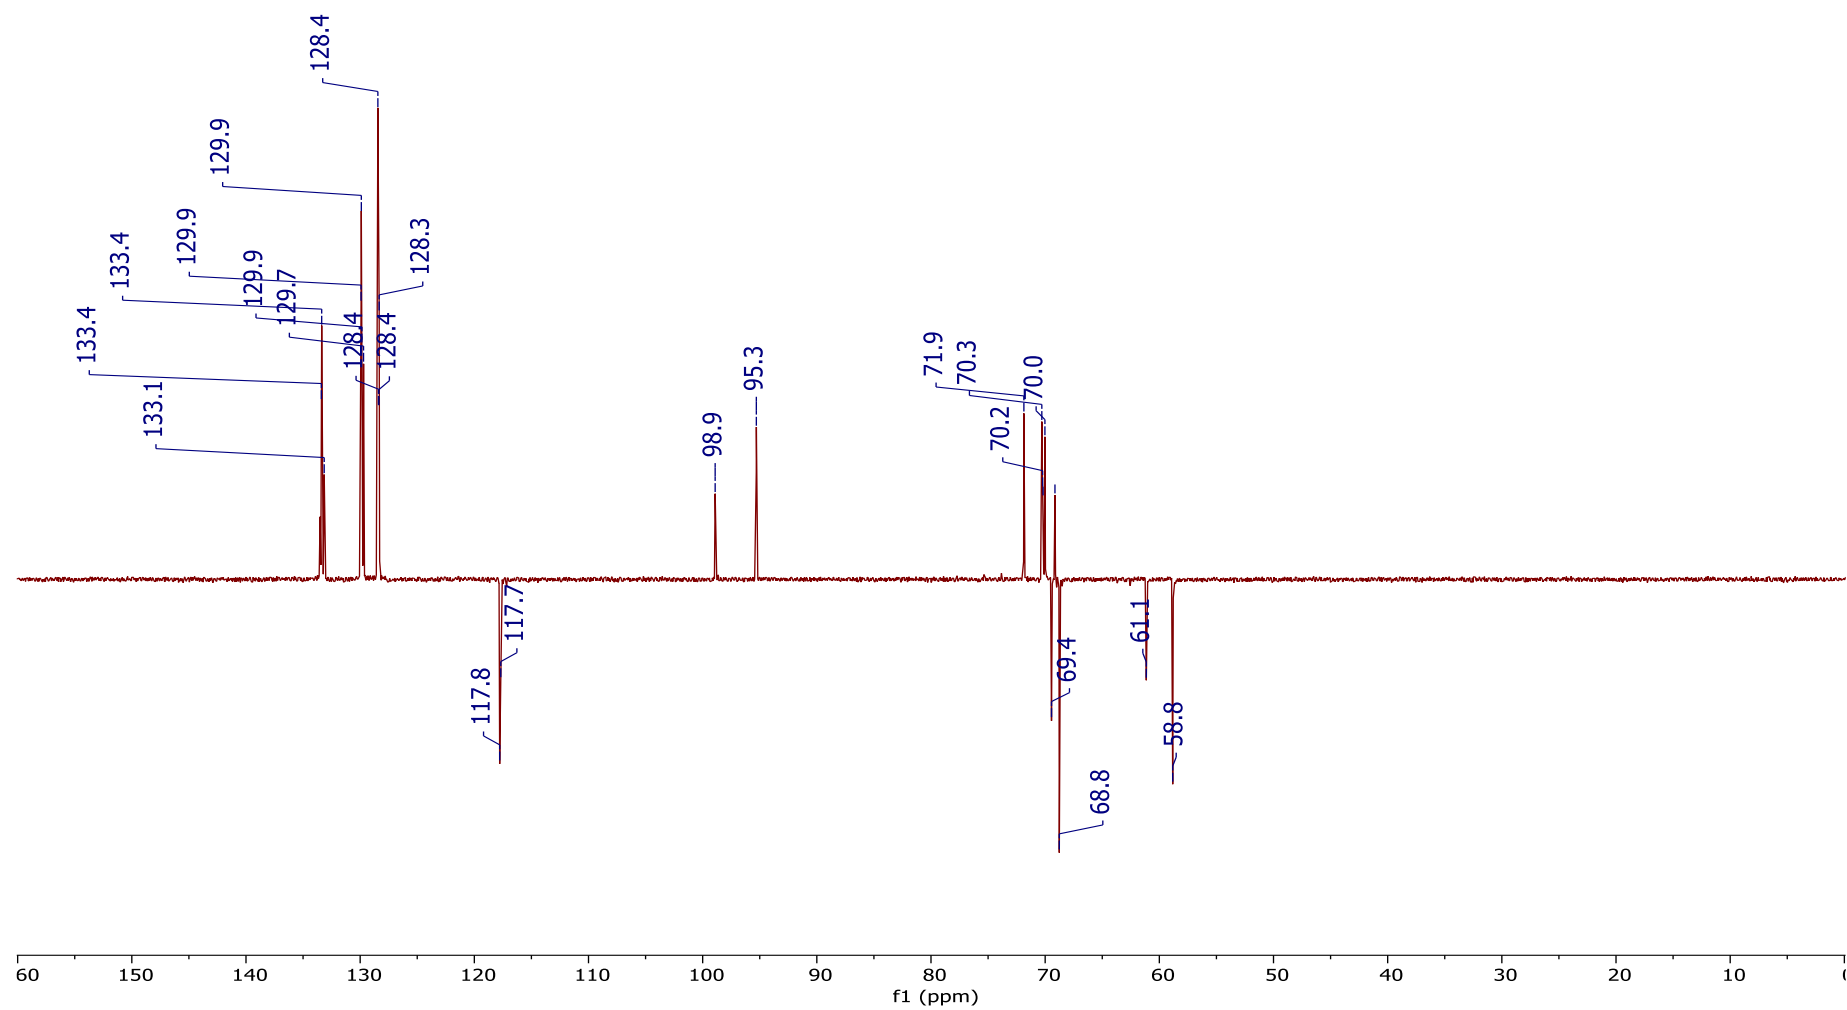

$^1\text{H}$  NMR Spectrum (400.31 MHz,  $\text{CDCl}_3$ ) of compound **4**

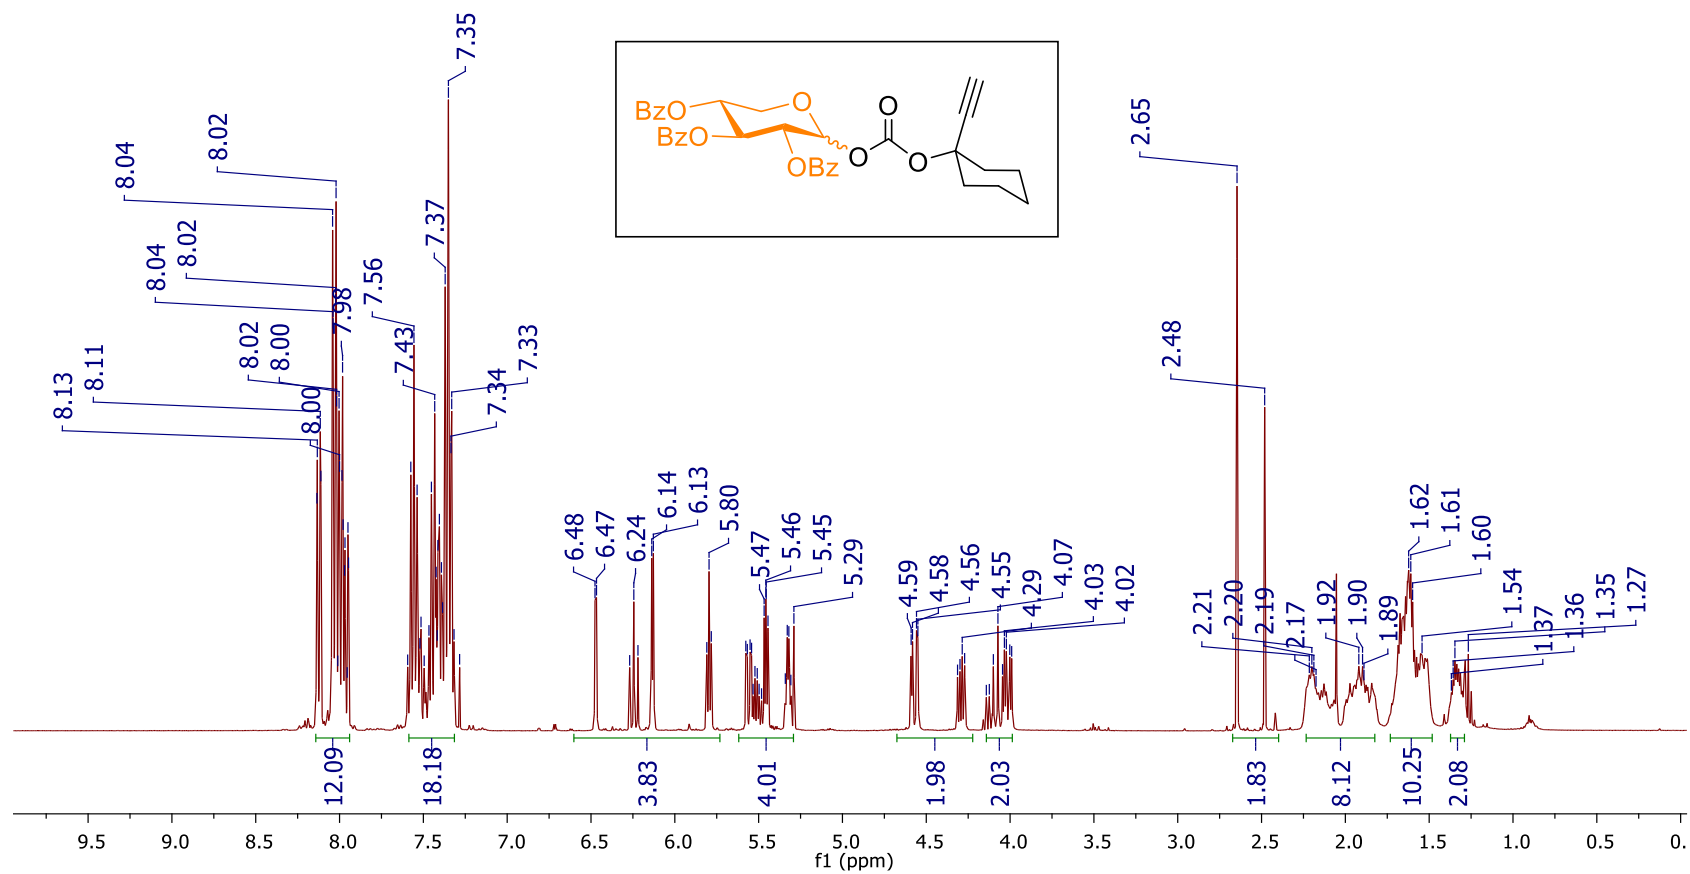

$^{13}\text{C}$  NMR Spectrum (100.67MHz,  $\text{CDCl}_3$ ) of compound **4**

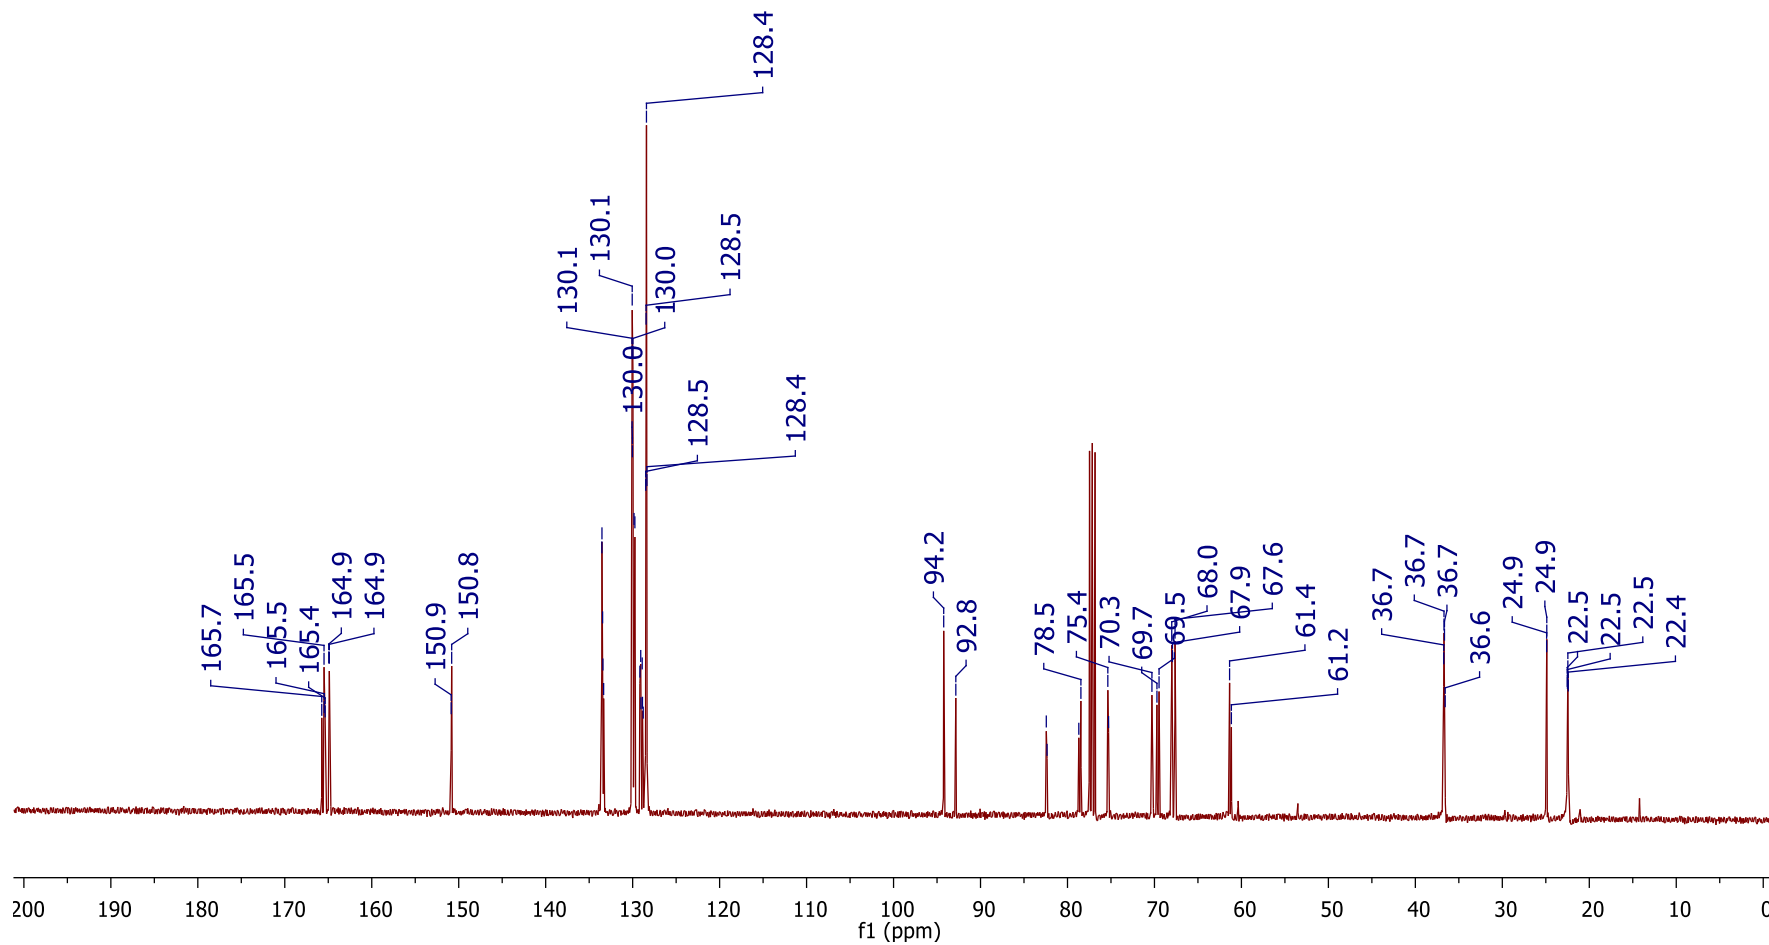

DEPT NMR Spectrum (100.67MHz, CDCl<sub>3</sub>) of compound **4**

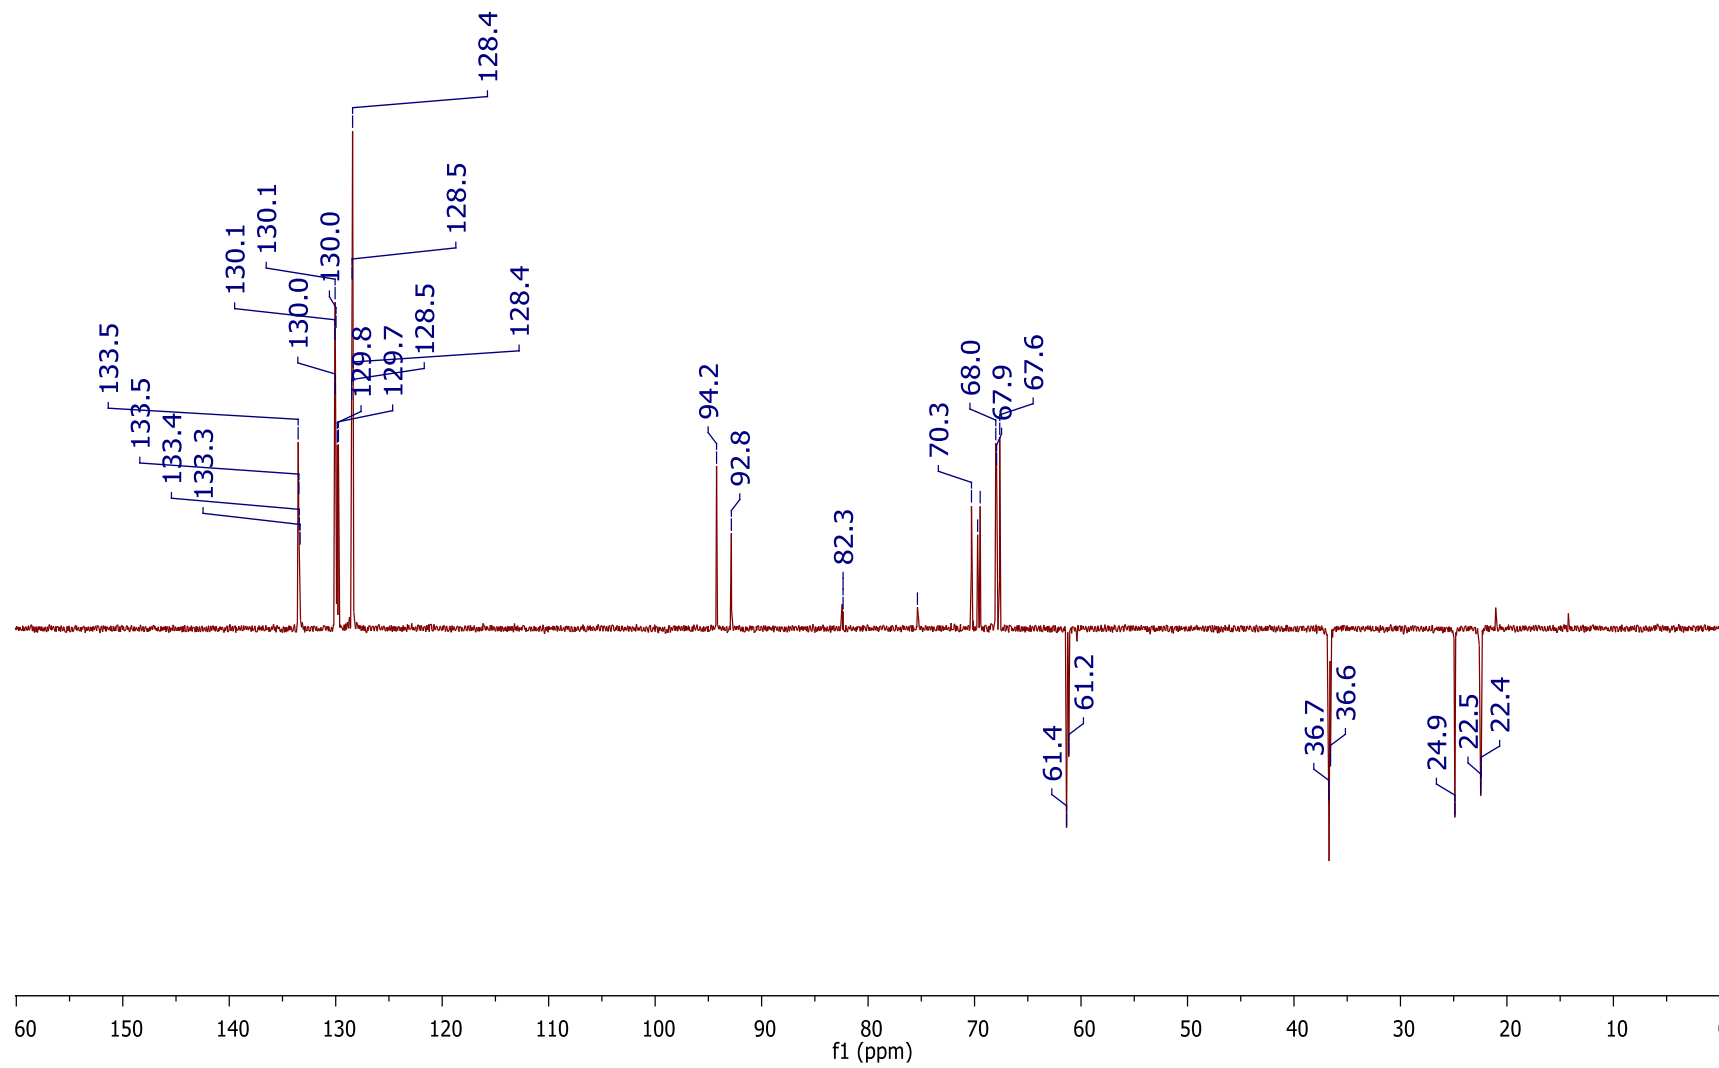

$^1\text{H}$  NMR Spectrum (400.31 MHz,  $\text{CDCl}_3$ ) of compound **13**

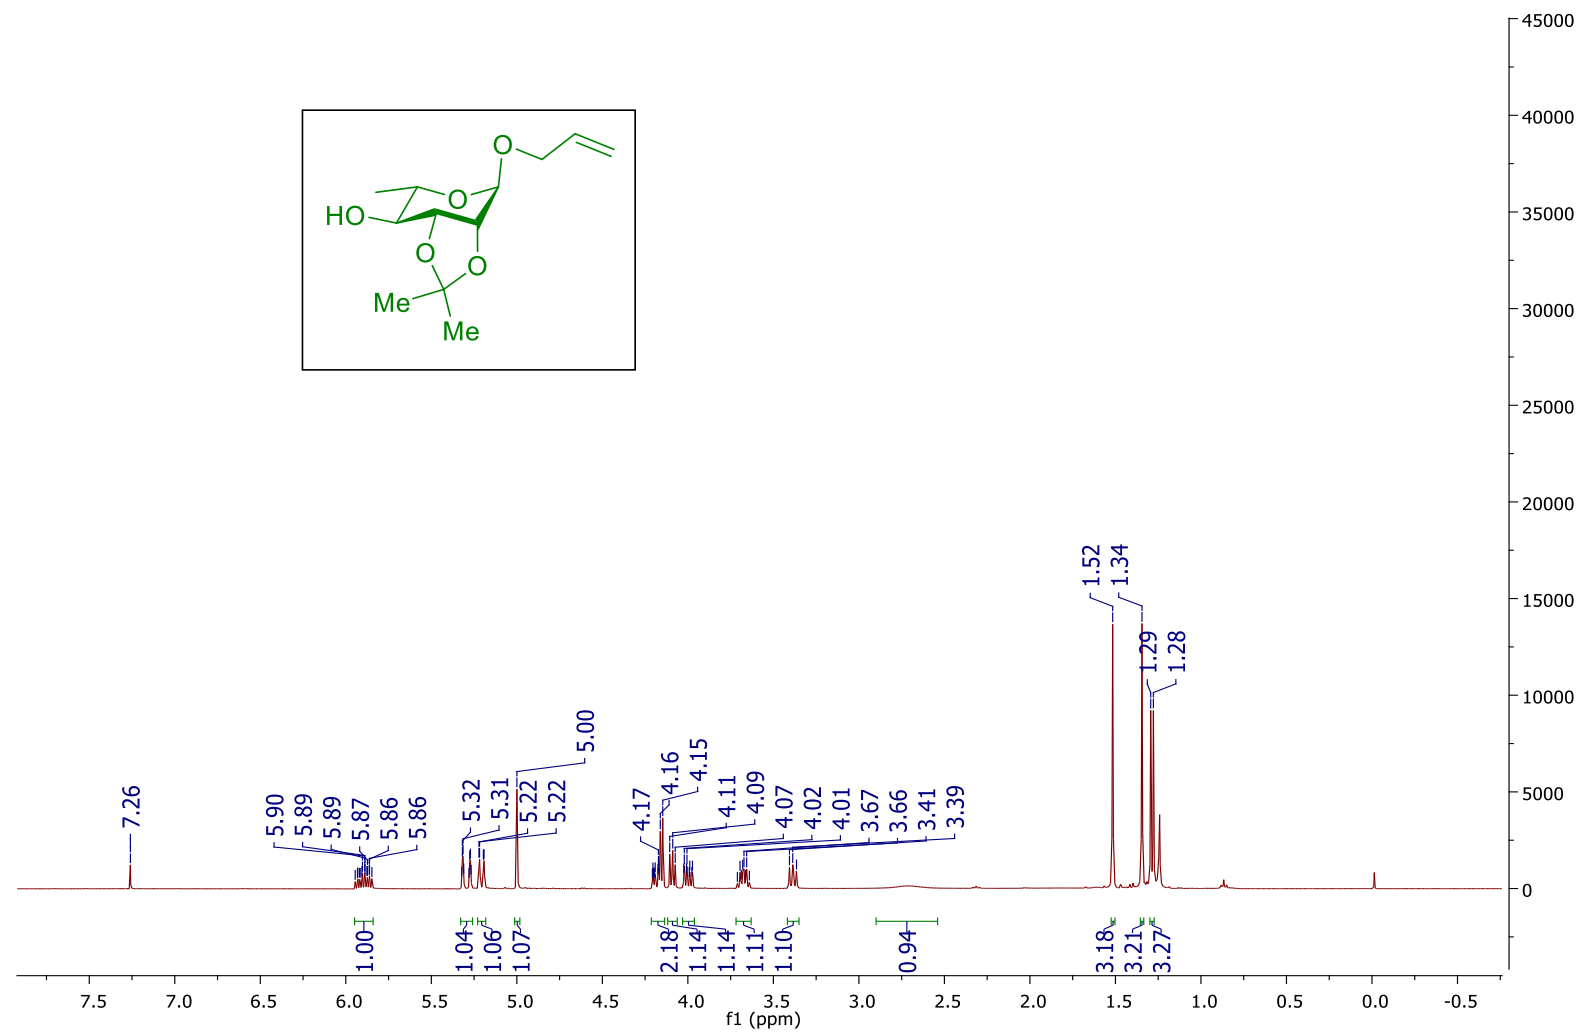

$^{13}\text{C}$  NMR Spectrum (100.67MHz,  $\text{CDCl}_3$ ) of compound **13**

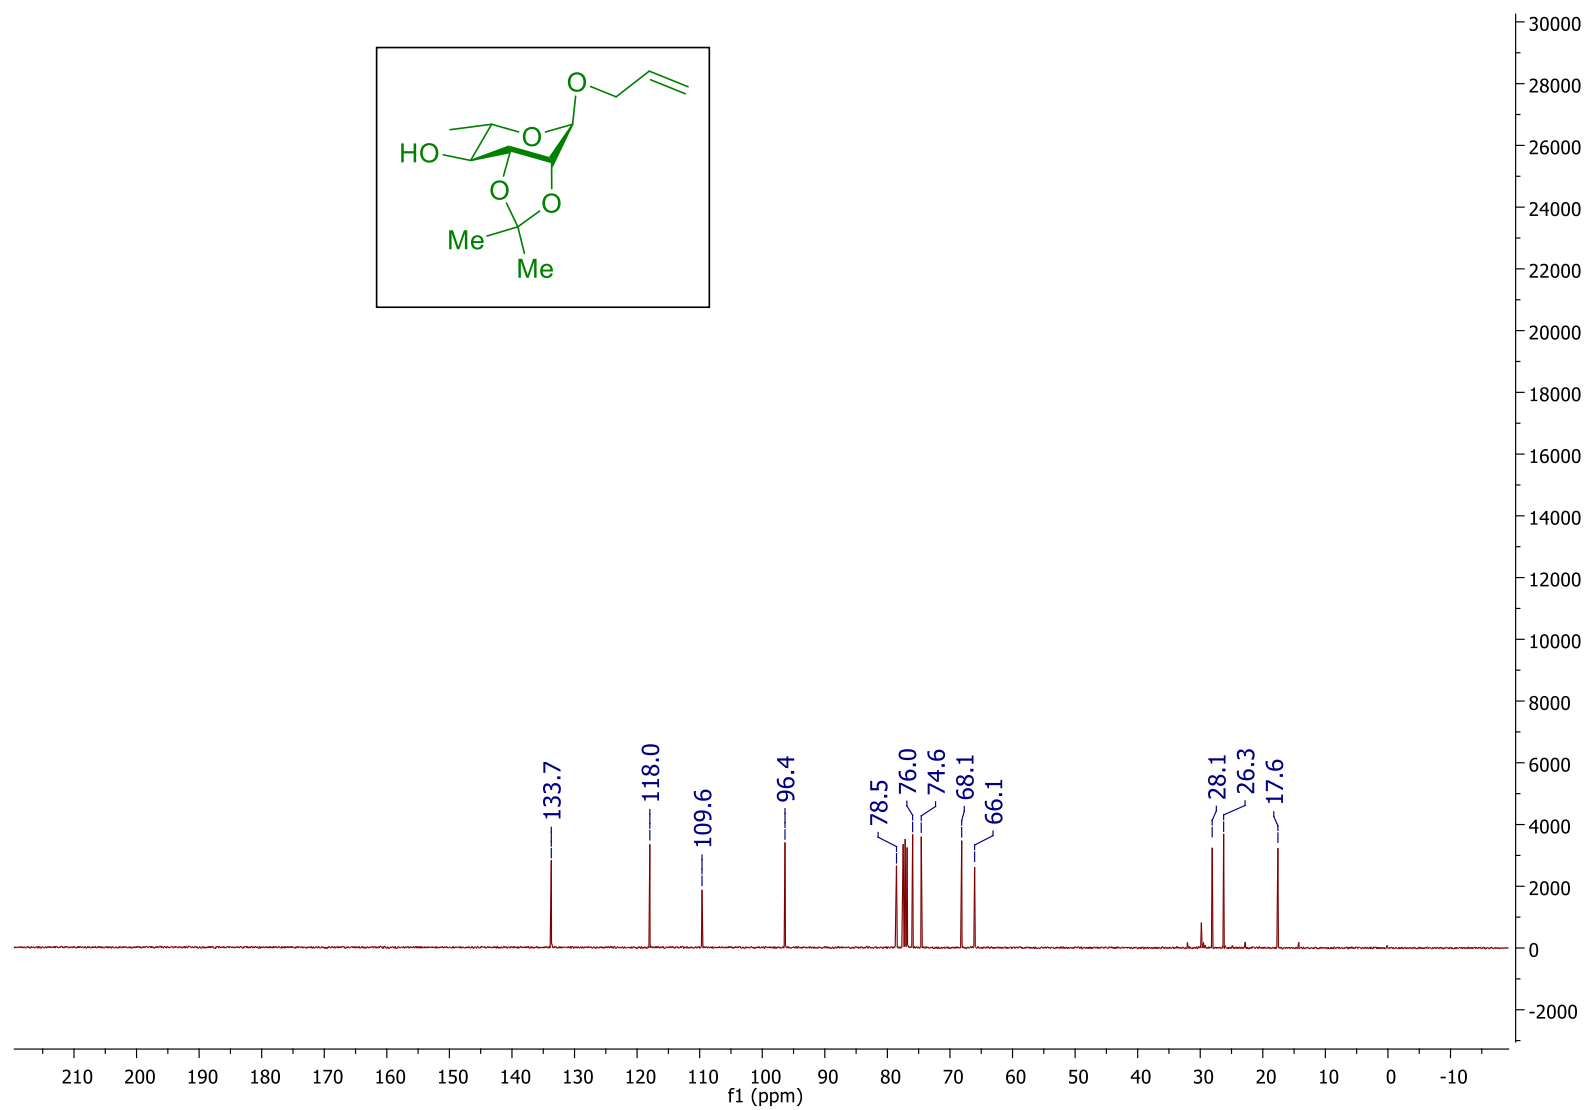



DEPT NMR Spectrum (100.67MHz, CDCl<sub>3</sub>) of compound **13**

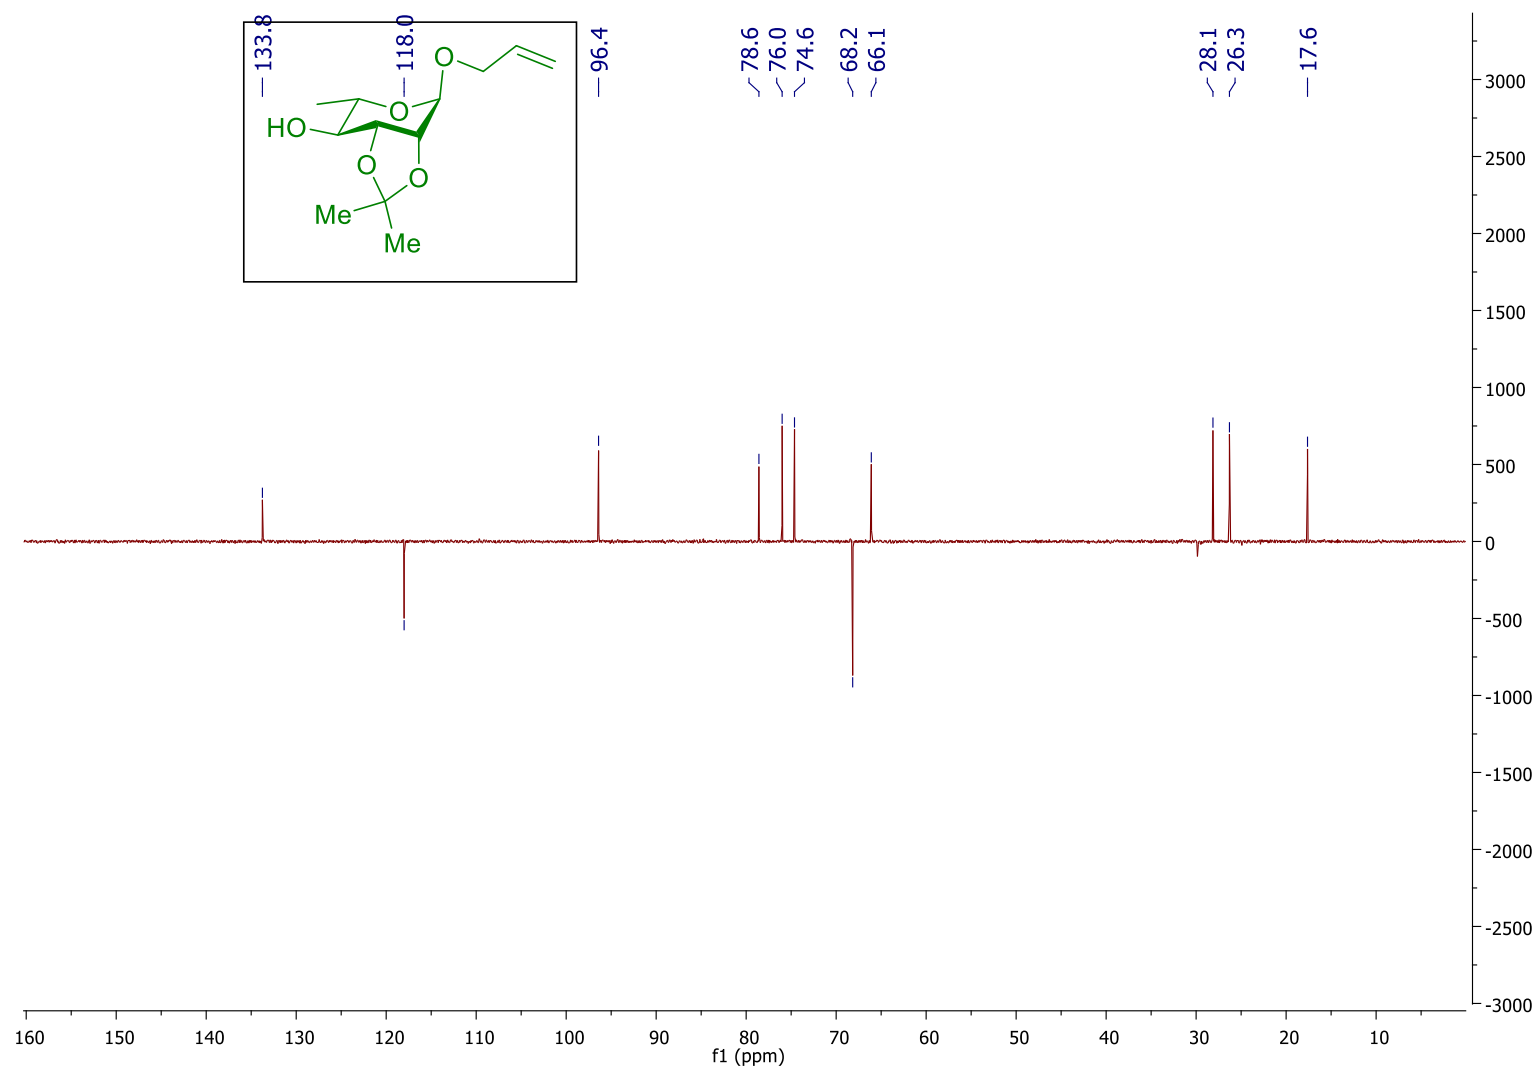

<sup>1</sup>H NMR Spectrum (400.31 MHz, CDCl<sub>3</sub>) of compound **14**

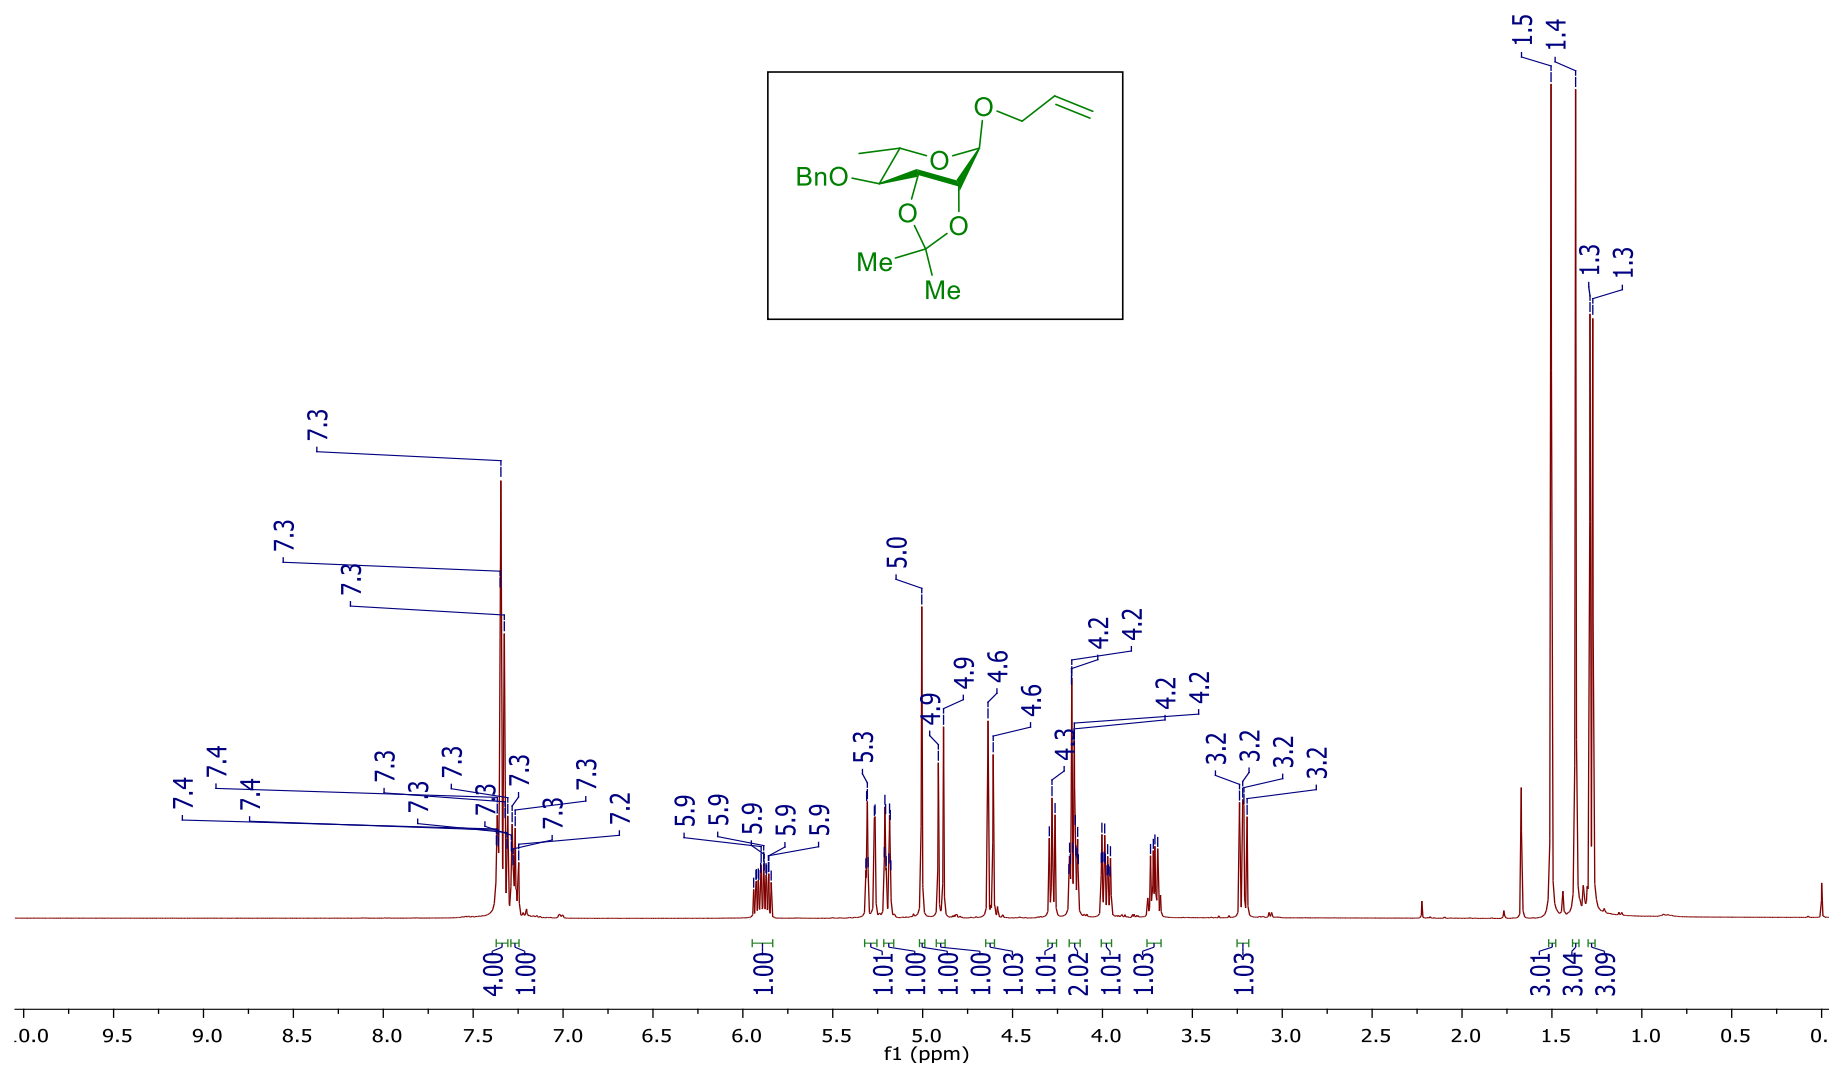

$^{13}\text{C}$  NMR Spectrum (100.67MHz,  $\text{CDCl}_3$ ) of compound **14**

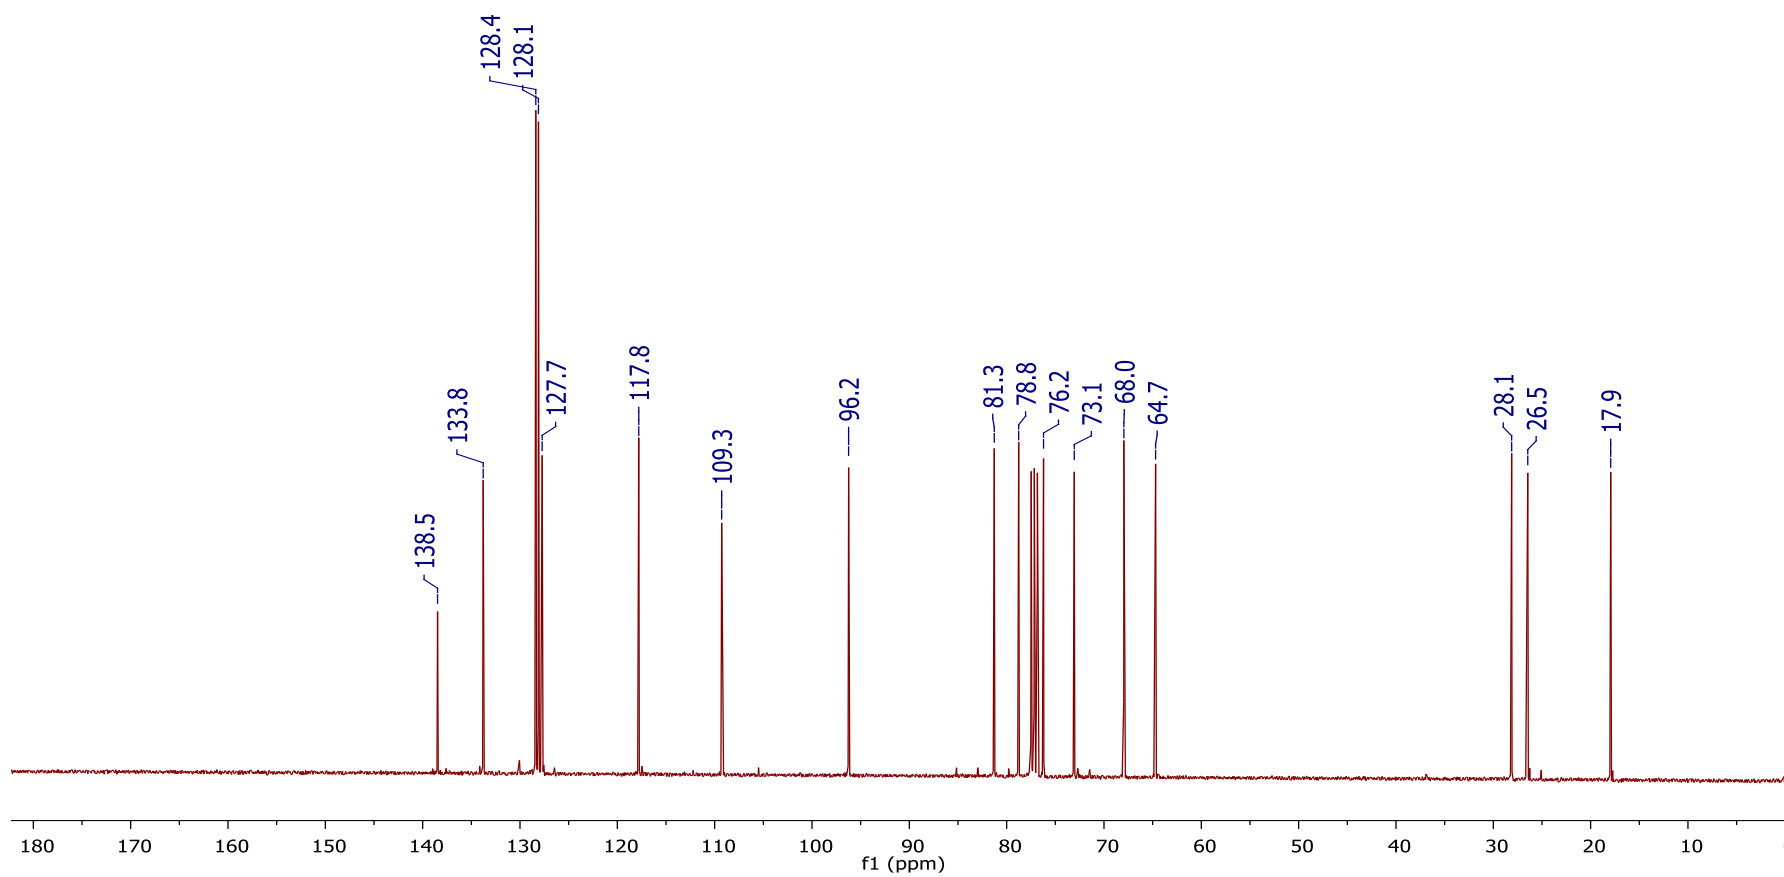

DEPT NMR Spectrum (100.67MHz, CDCl<sub>3</sub>) of compound **14**

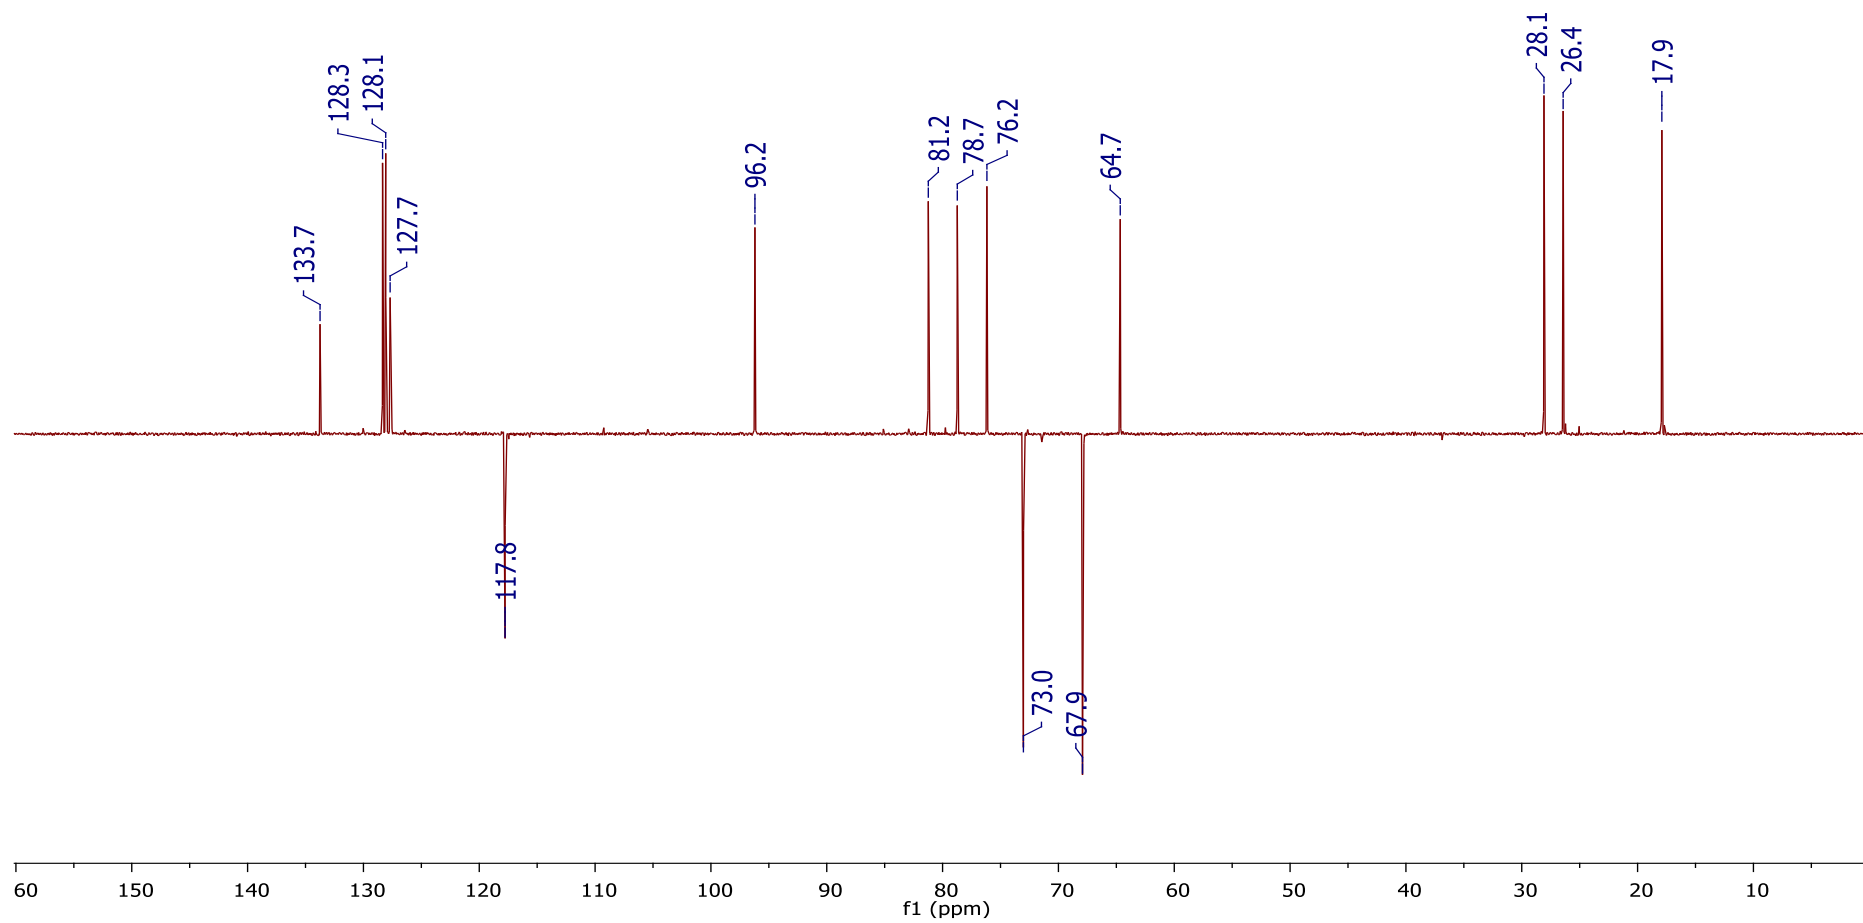

$^1\text{H}$  NMR Spectrum (400.31 MHz,  $\text{CDCl}_3$ ) of compound **15**

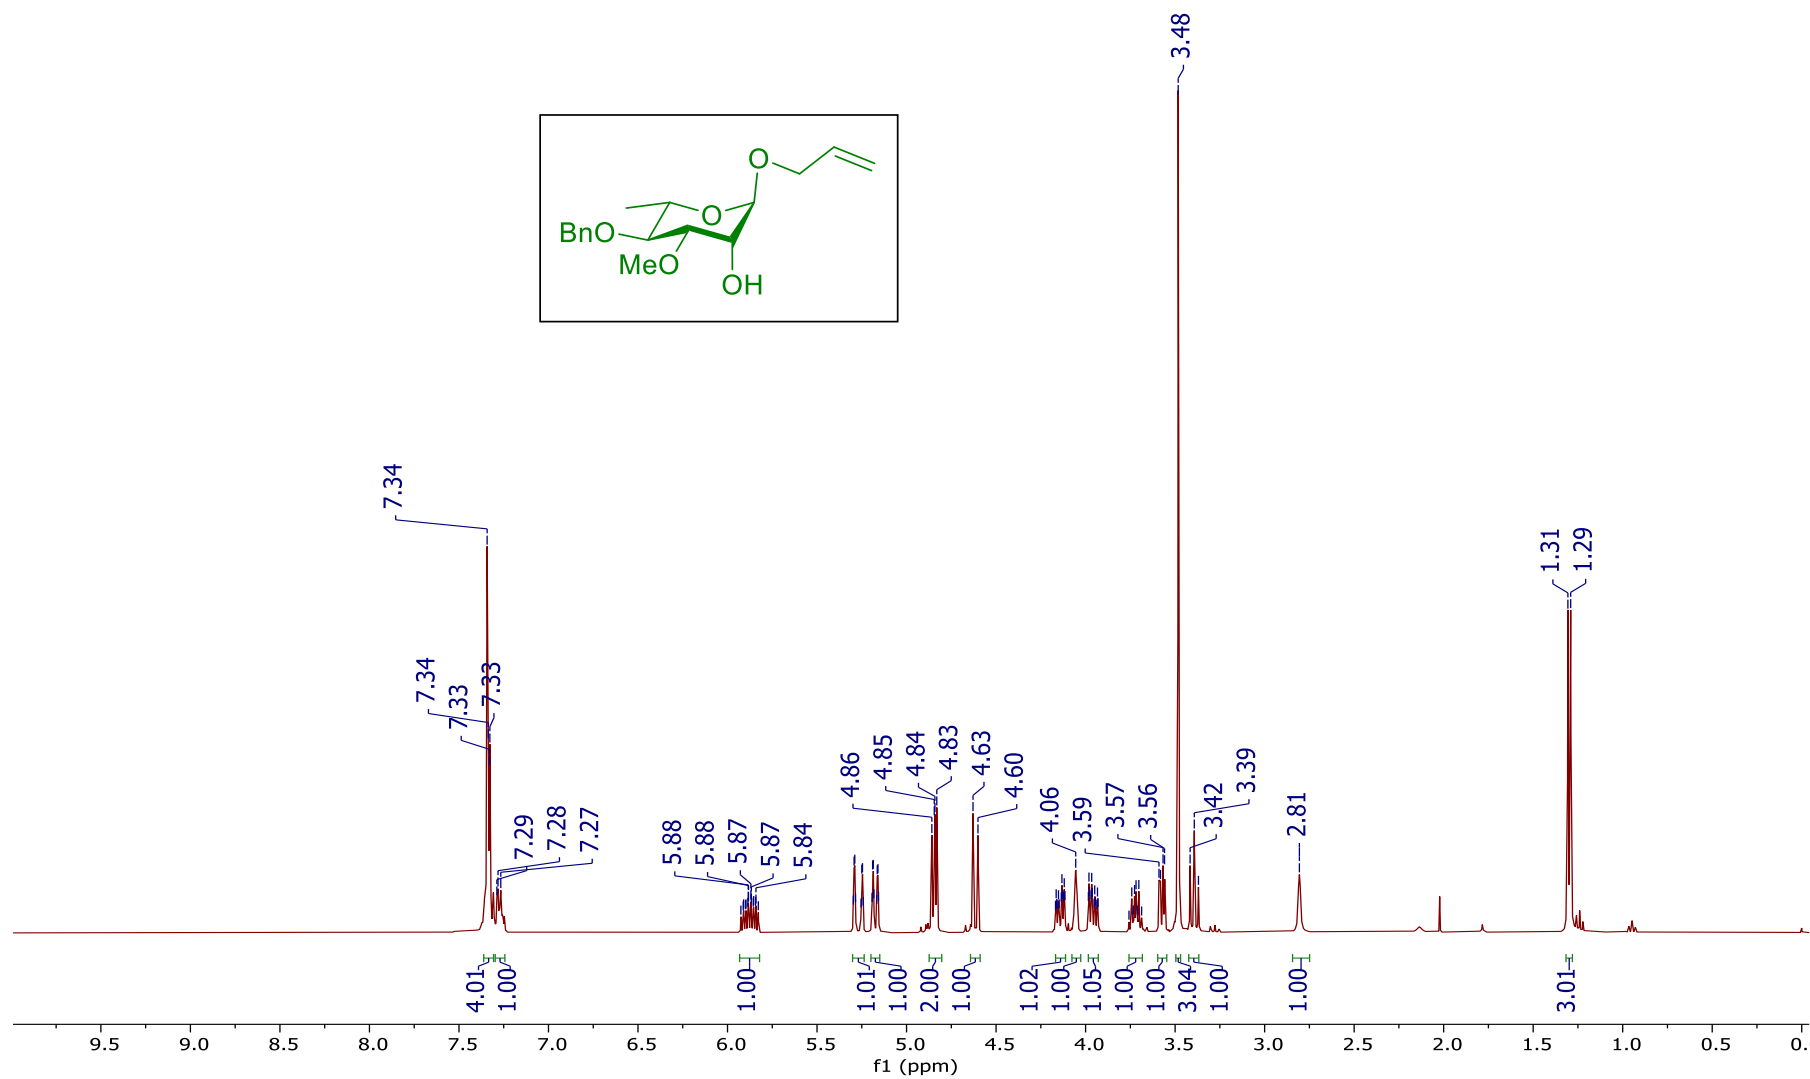

$^{13}\text{C}$  NMR Spectrum (100.67MHz,  $\text{CDCl}_3$ ) of compound **15**

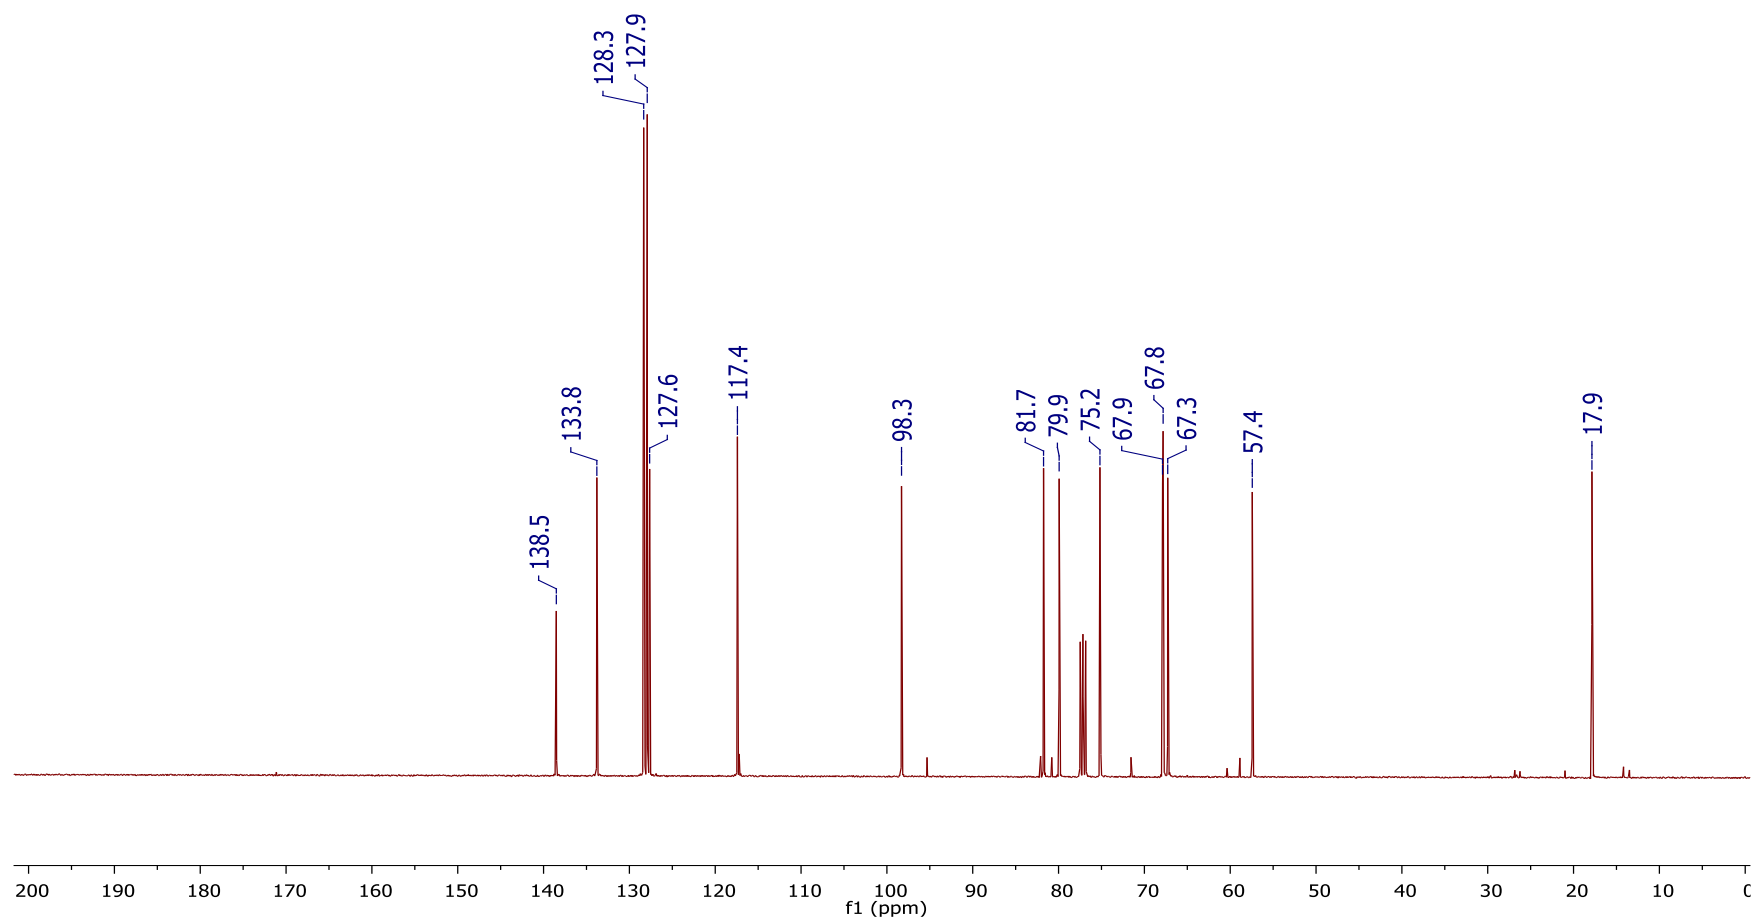

DEPT NMR Spectrum (100.67MHz, CDCl<sub>3</sub>) of compound **15**

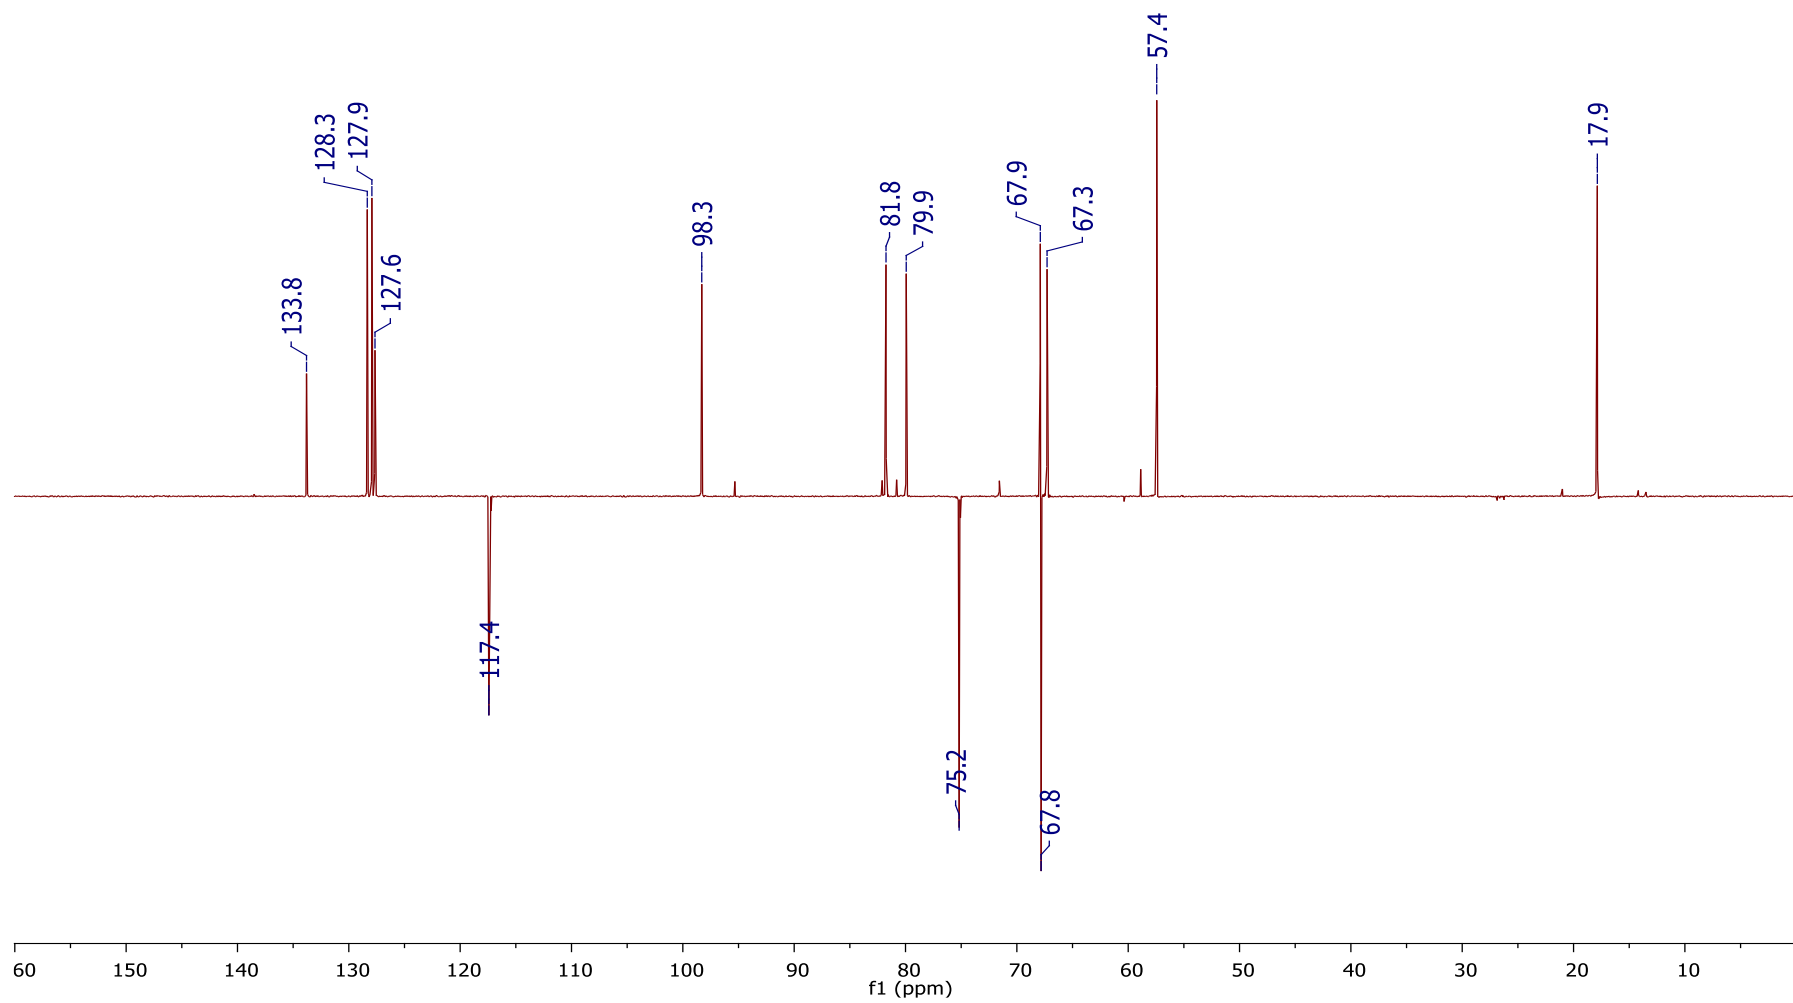

<sup>1</sup>H NMR Spectrum (400.31 MHz, CDCl<sub>3</sub>) of compound **5**

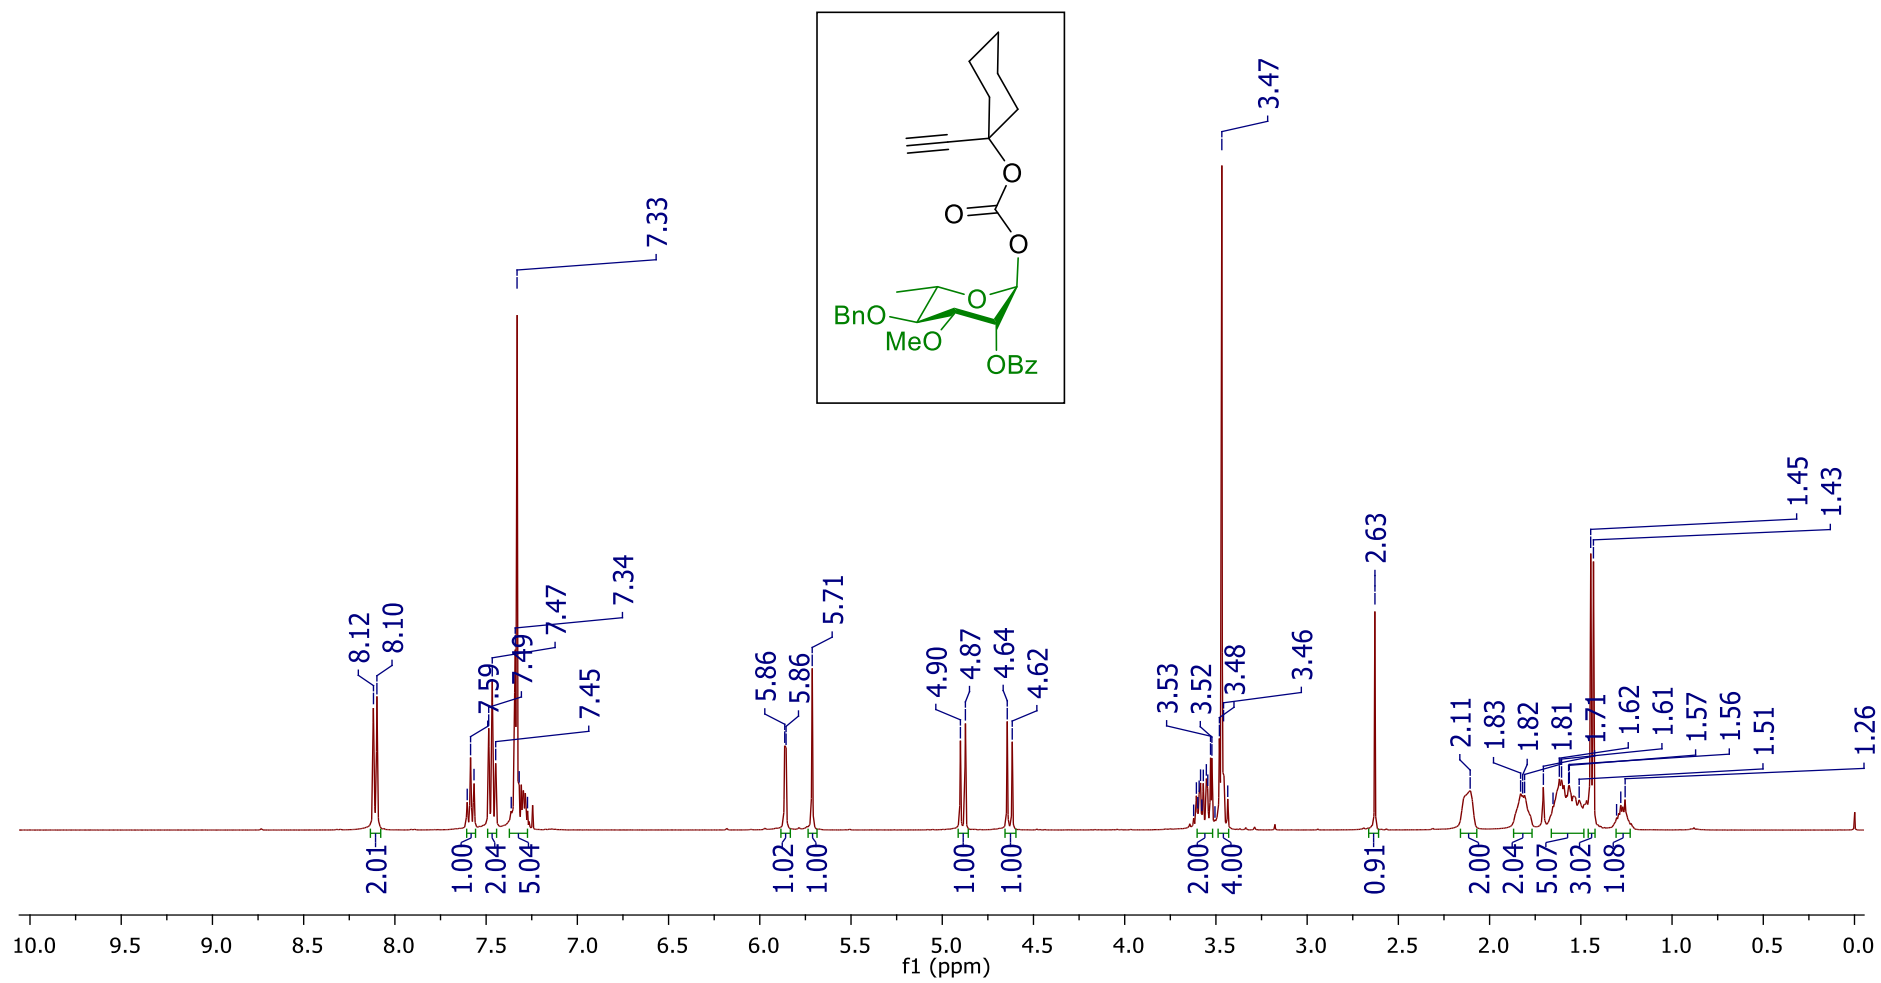



$^{13}\text{C}$  NMR Spectrum (100.67MHz,  $\text{CDCl}_3$ ) of compound **5**

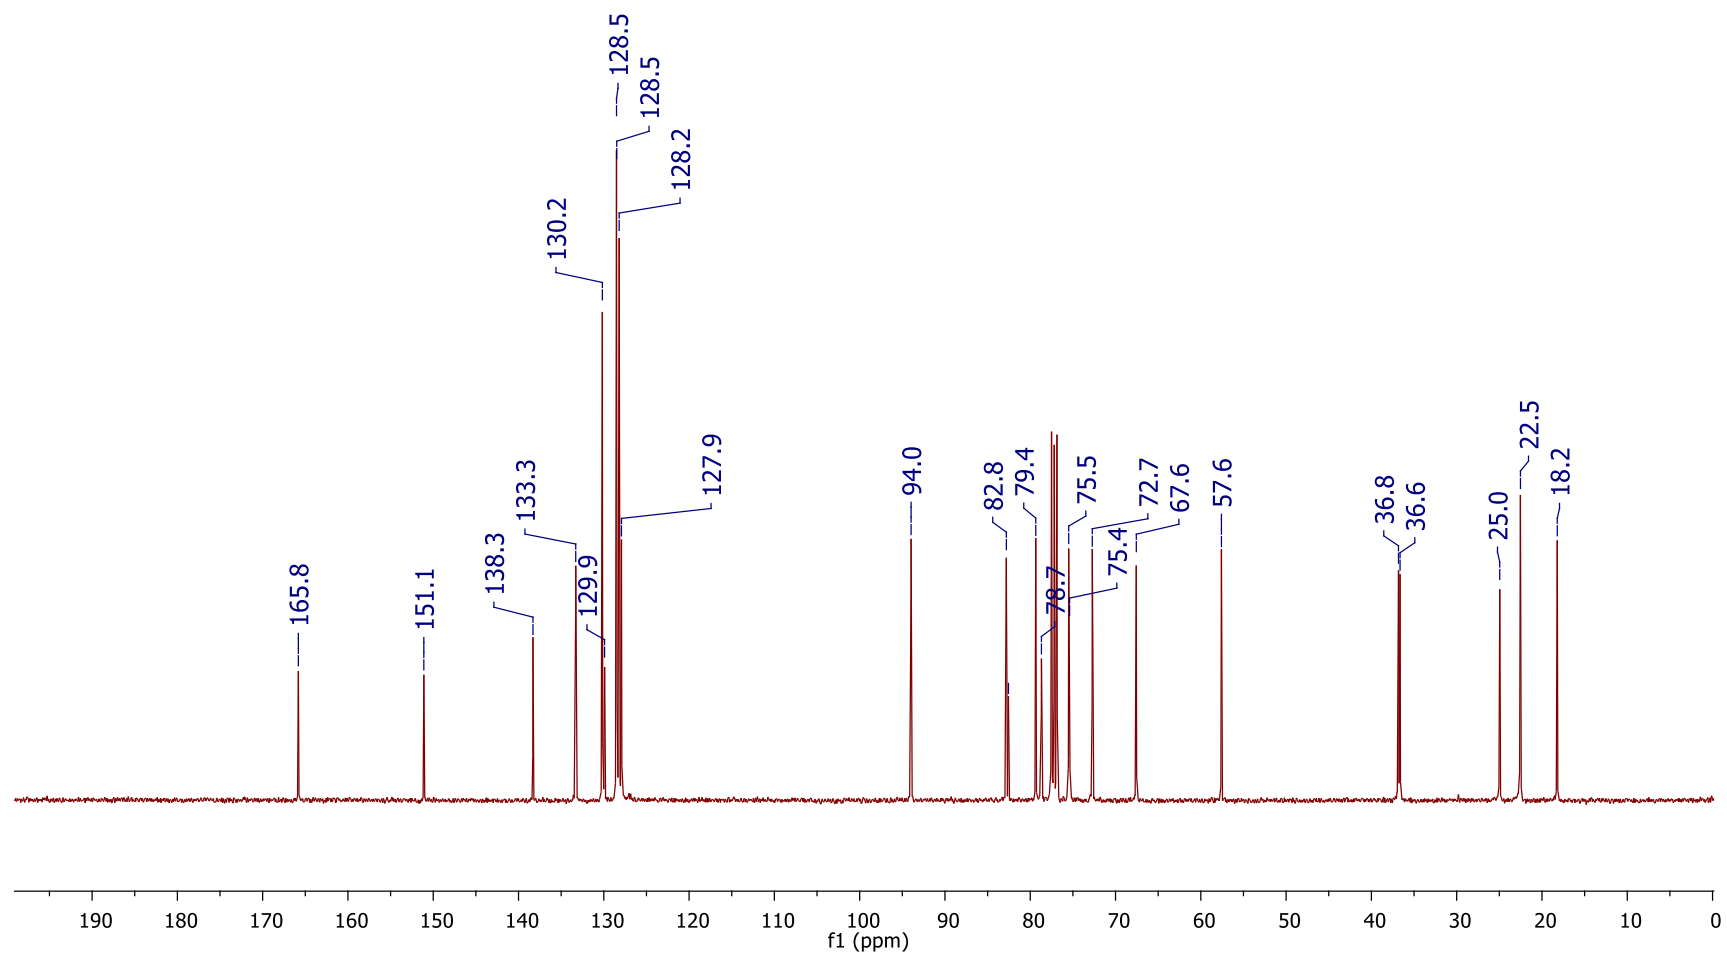

DEPT NMR Spectrum (100.67MHz, CDCl<sub>3</sub>) of compound **5**

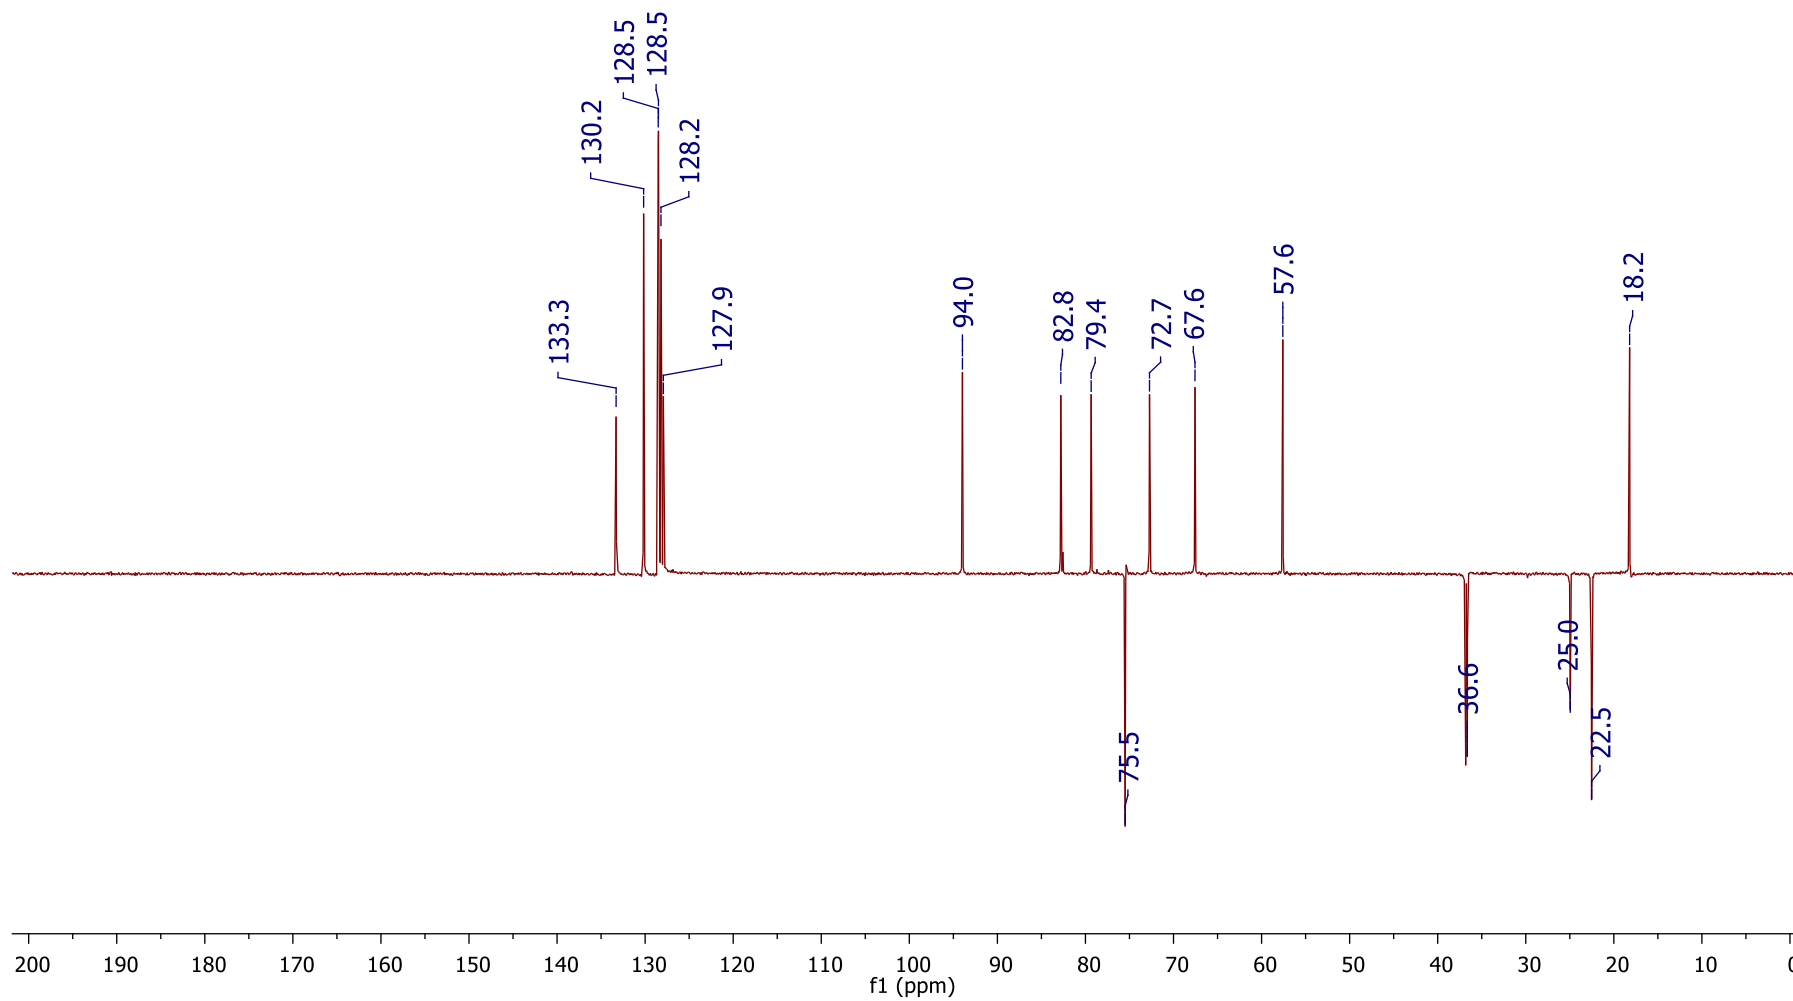

$^1\text{H}$  NMR Spectrum (400.31 MHz,  $\text{CDCl}_3$ ) of compound **6a $\beta$**

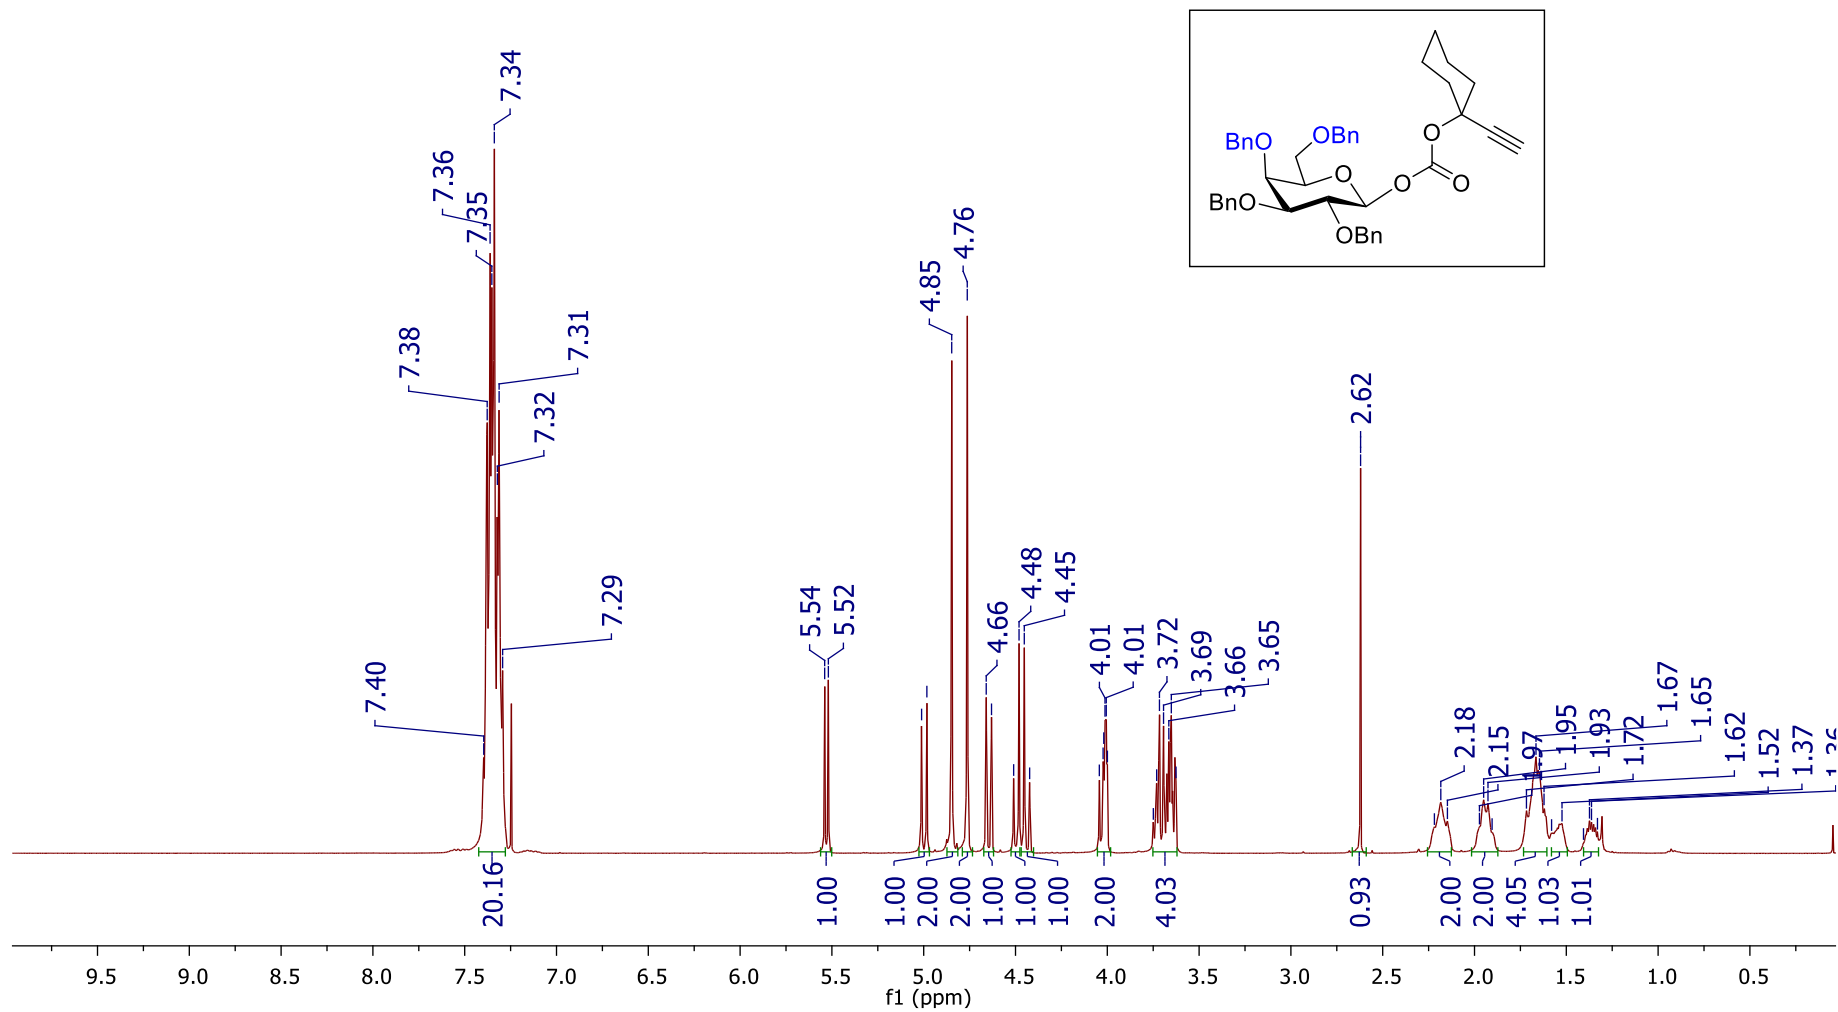

$^{13}\text{C}$  NMR Spectrum (100.67MHz,  $\text{CDCl}_3$ ) of compound **6a $\beta$**

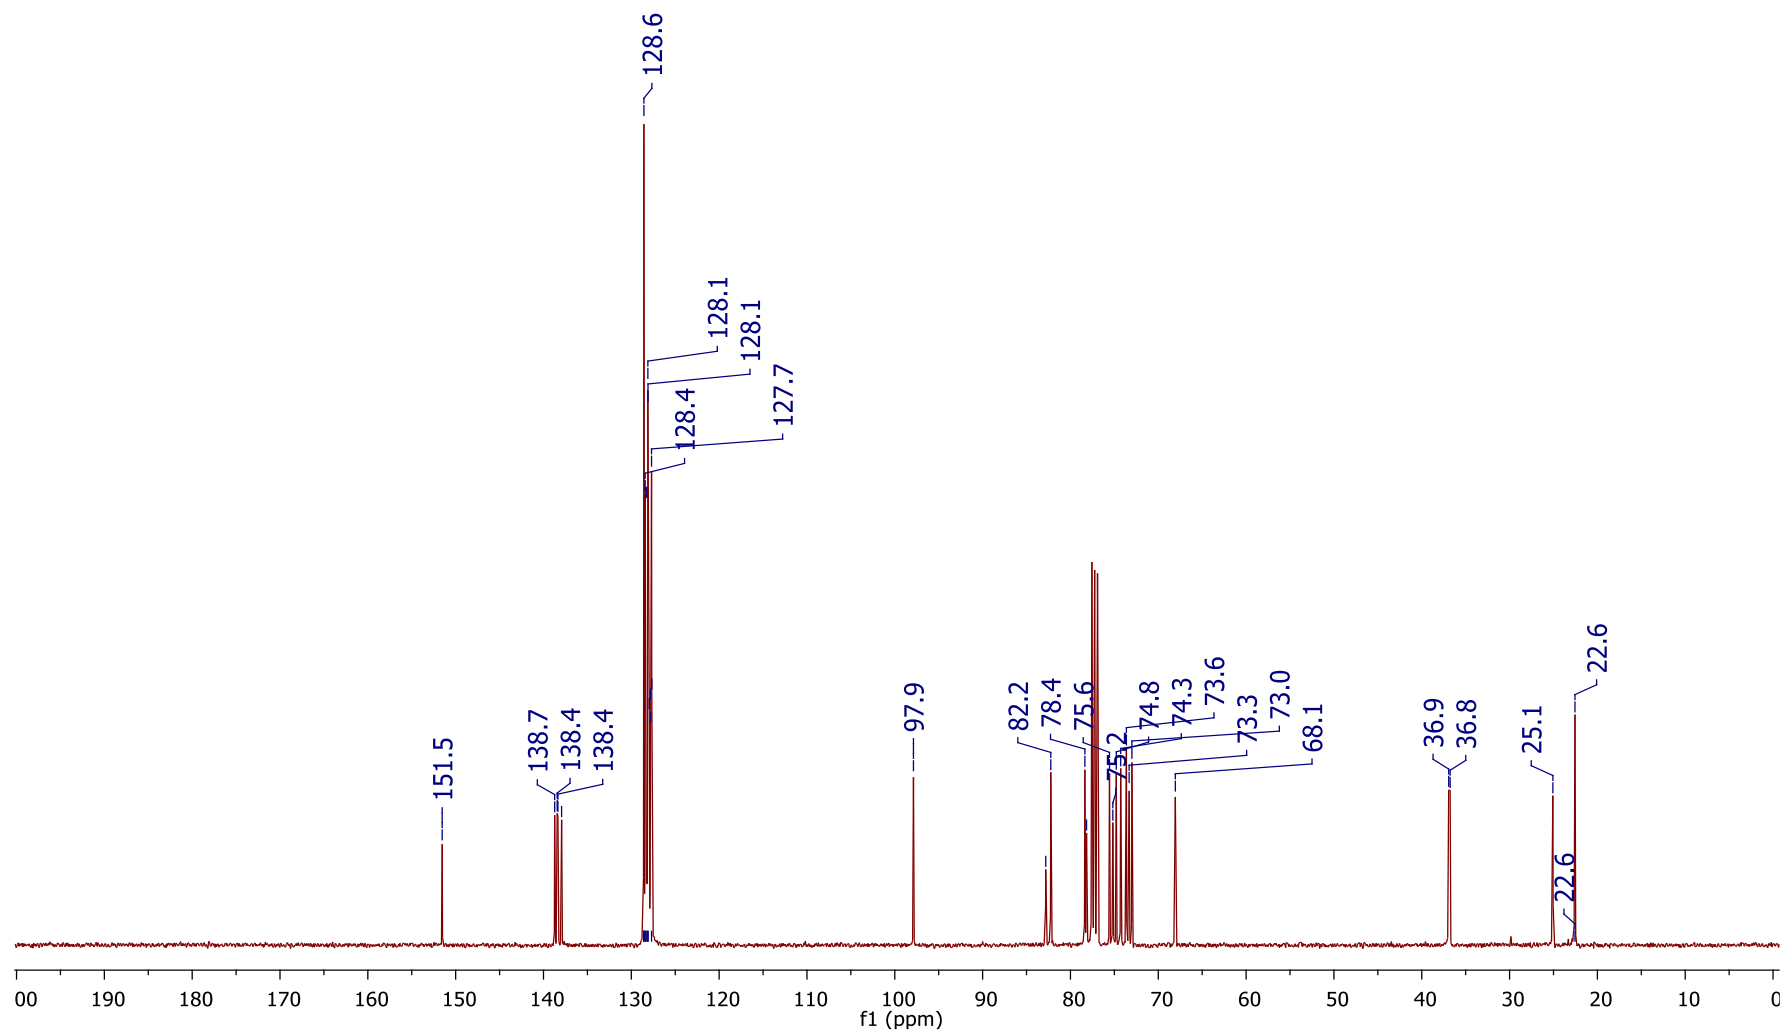

DEPT NMR Spectrum (100.67MHz, CDCl<sub>3</sub>) of compound **6a $\beta$**

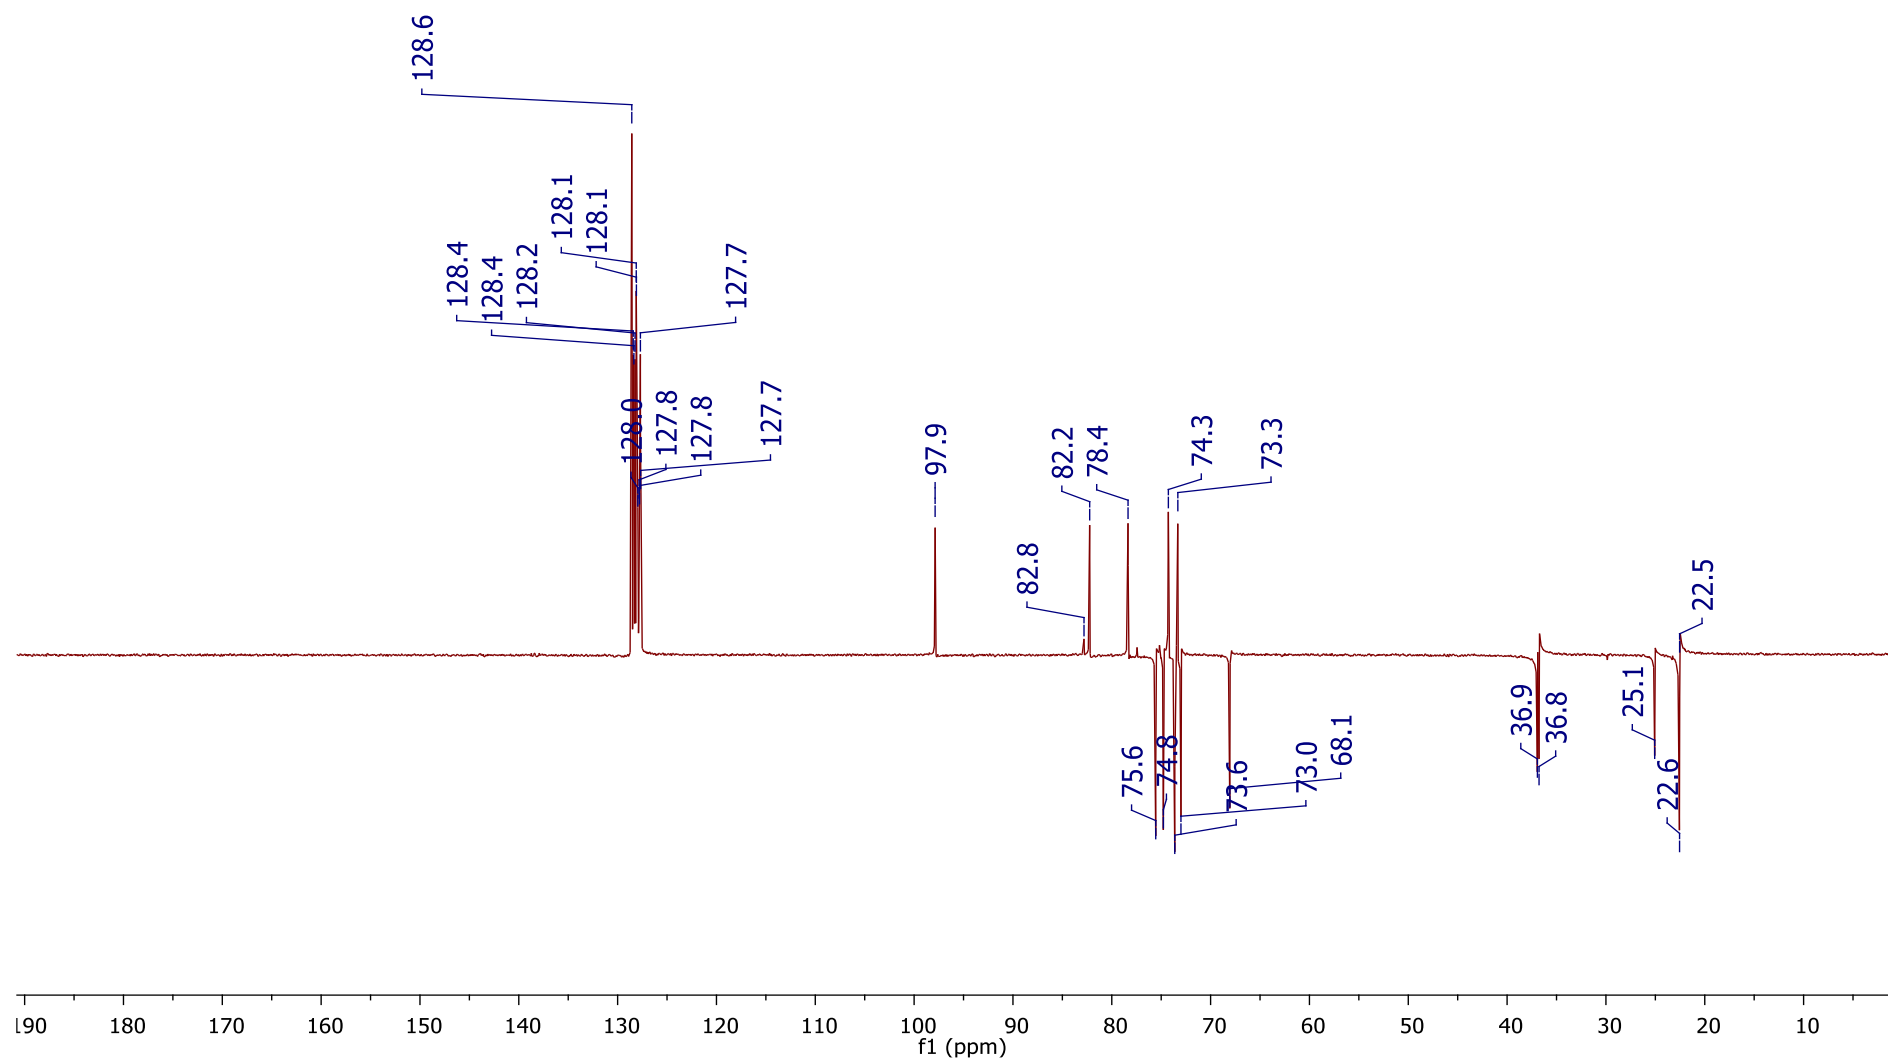

$^1\text{H}$  NMR Spectrum (400.31 MHz,  $\text{CDCl}_3$ ) of compound **6a $\alpha$**

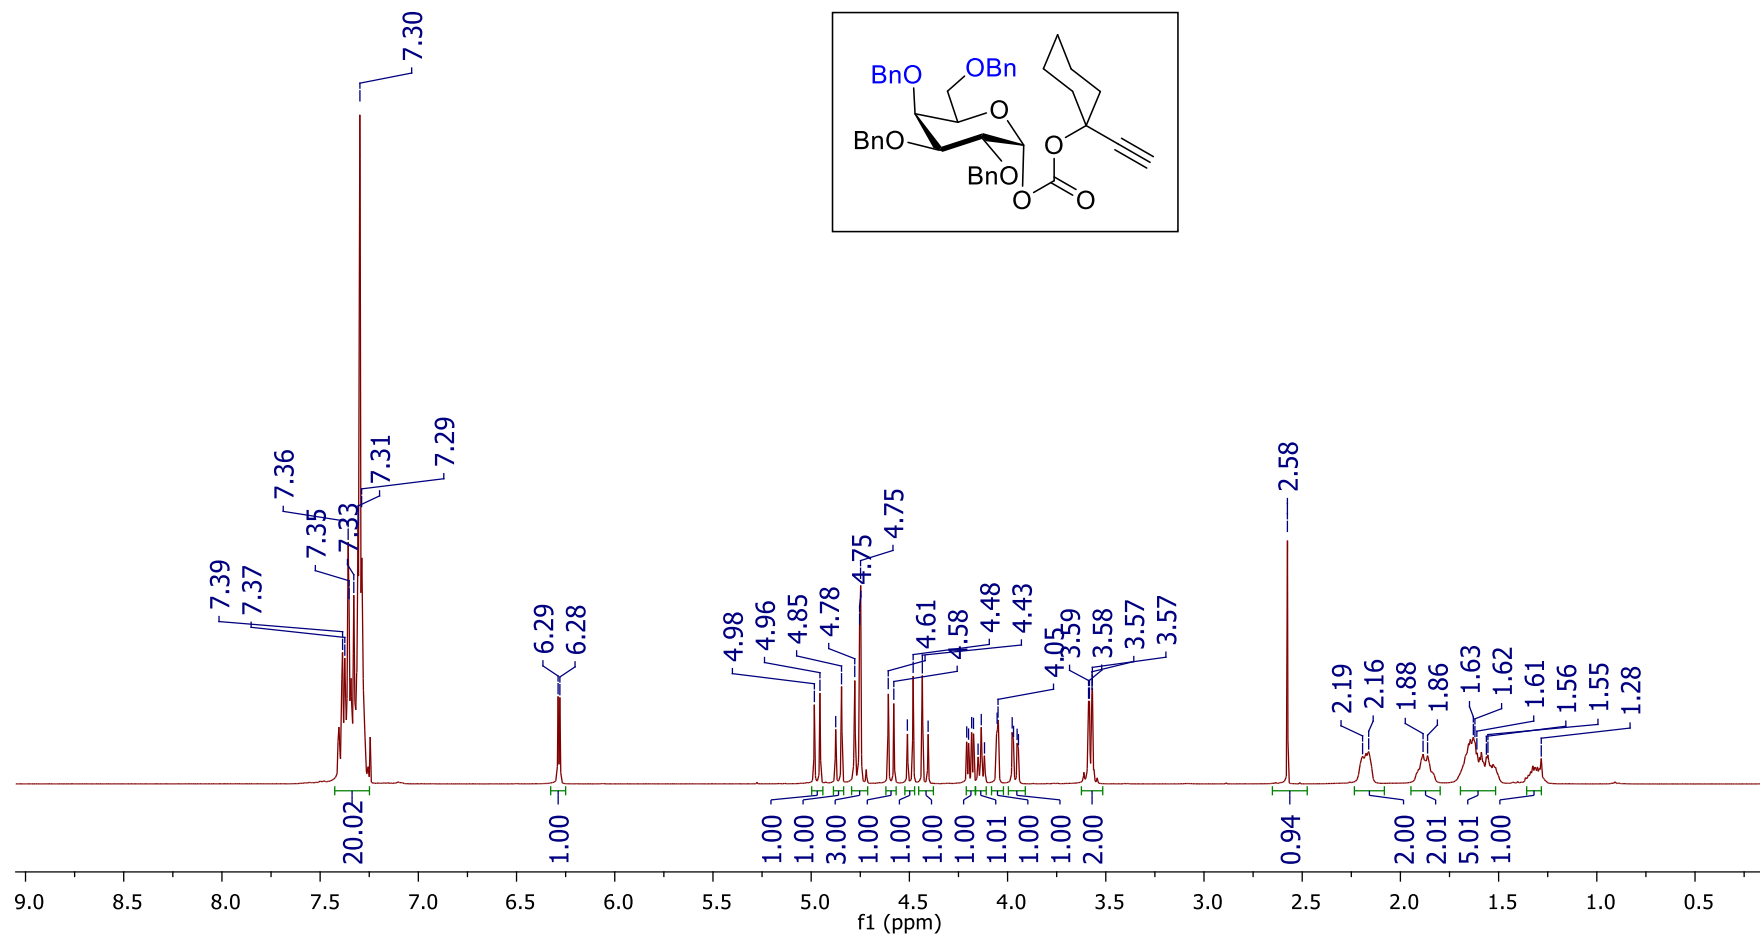

$^{13}\text{C}$  NMR Spectrum (100.67MHz,  $\text{CDCl}_3$ ) of compound **6a $\alpha$**

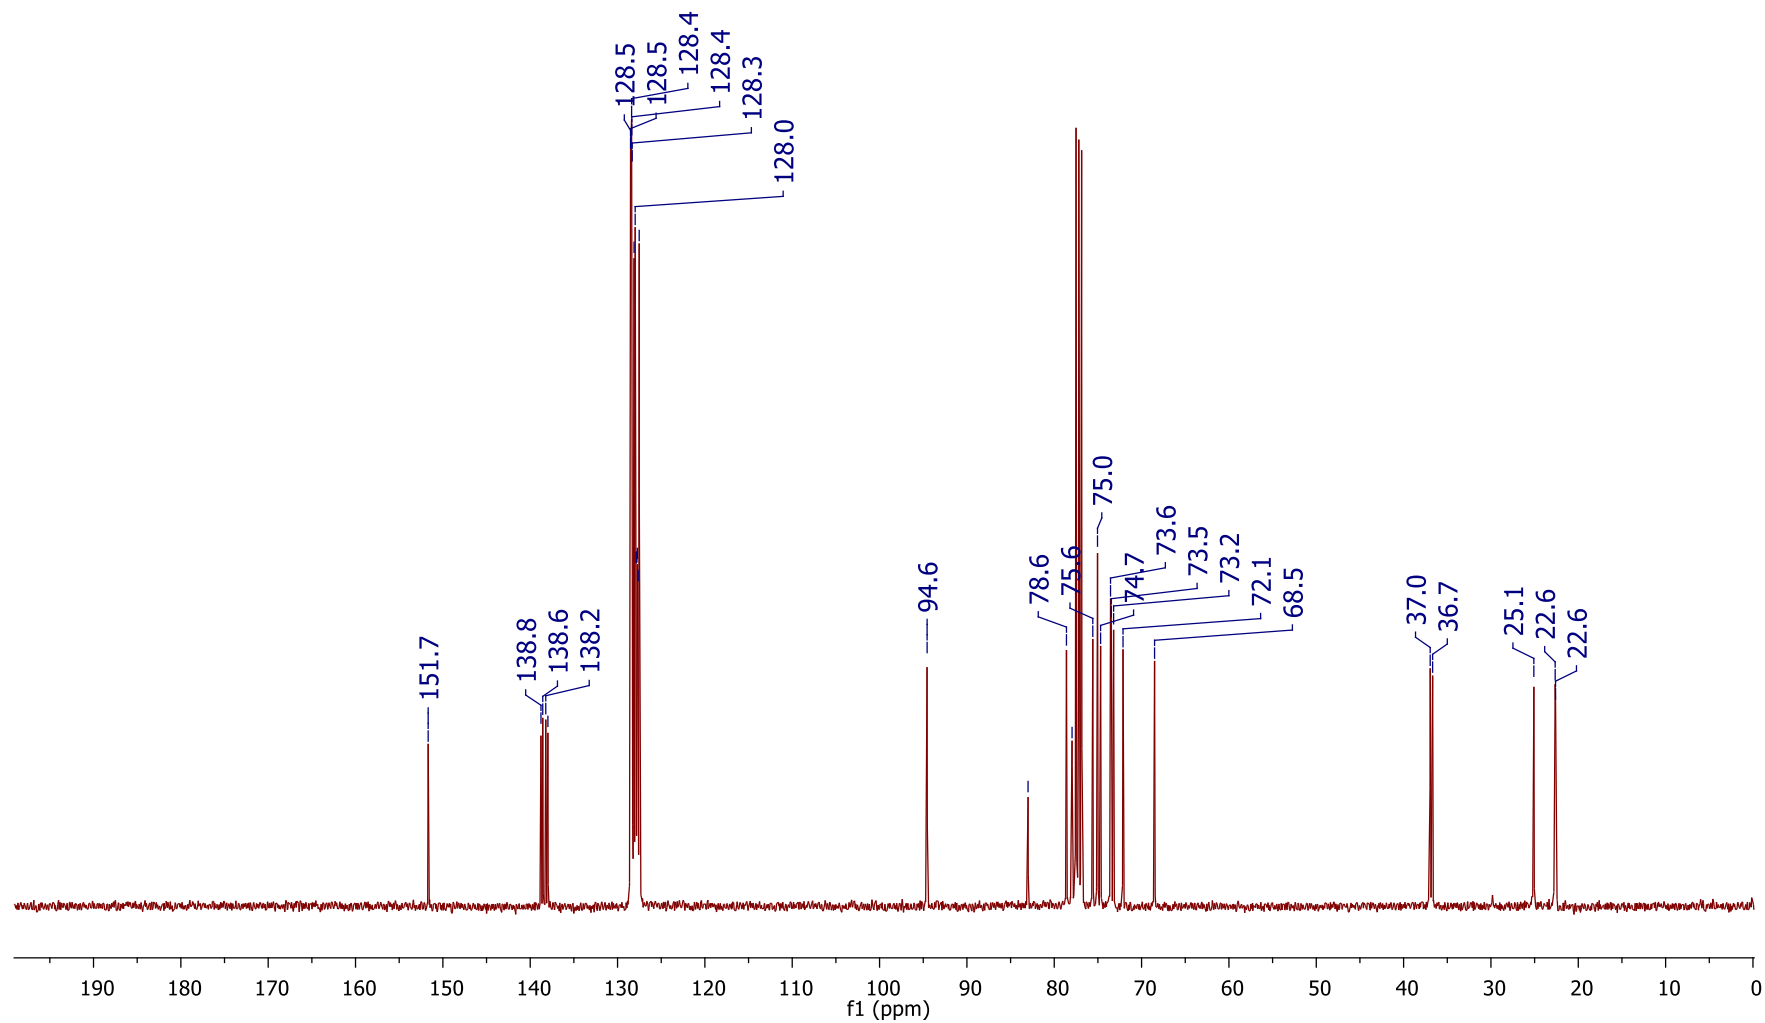

DEPT NMR Spectrum (100.67MHz, CDCl<sub>3</sub>) of compound **6aα**

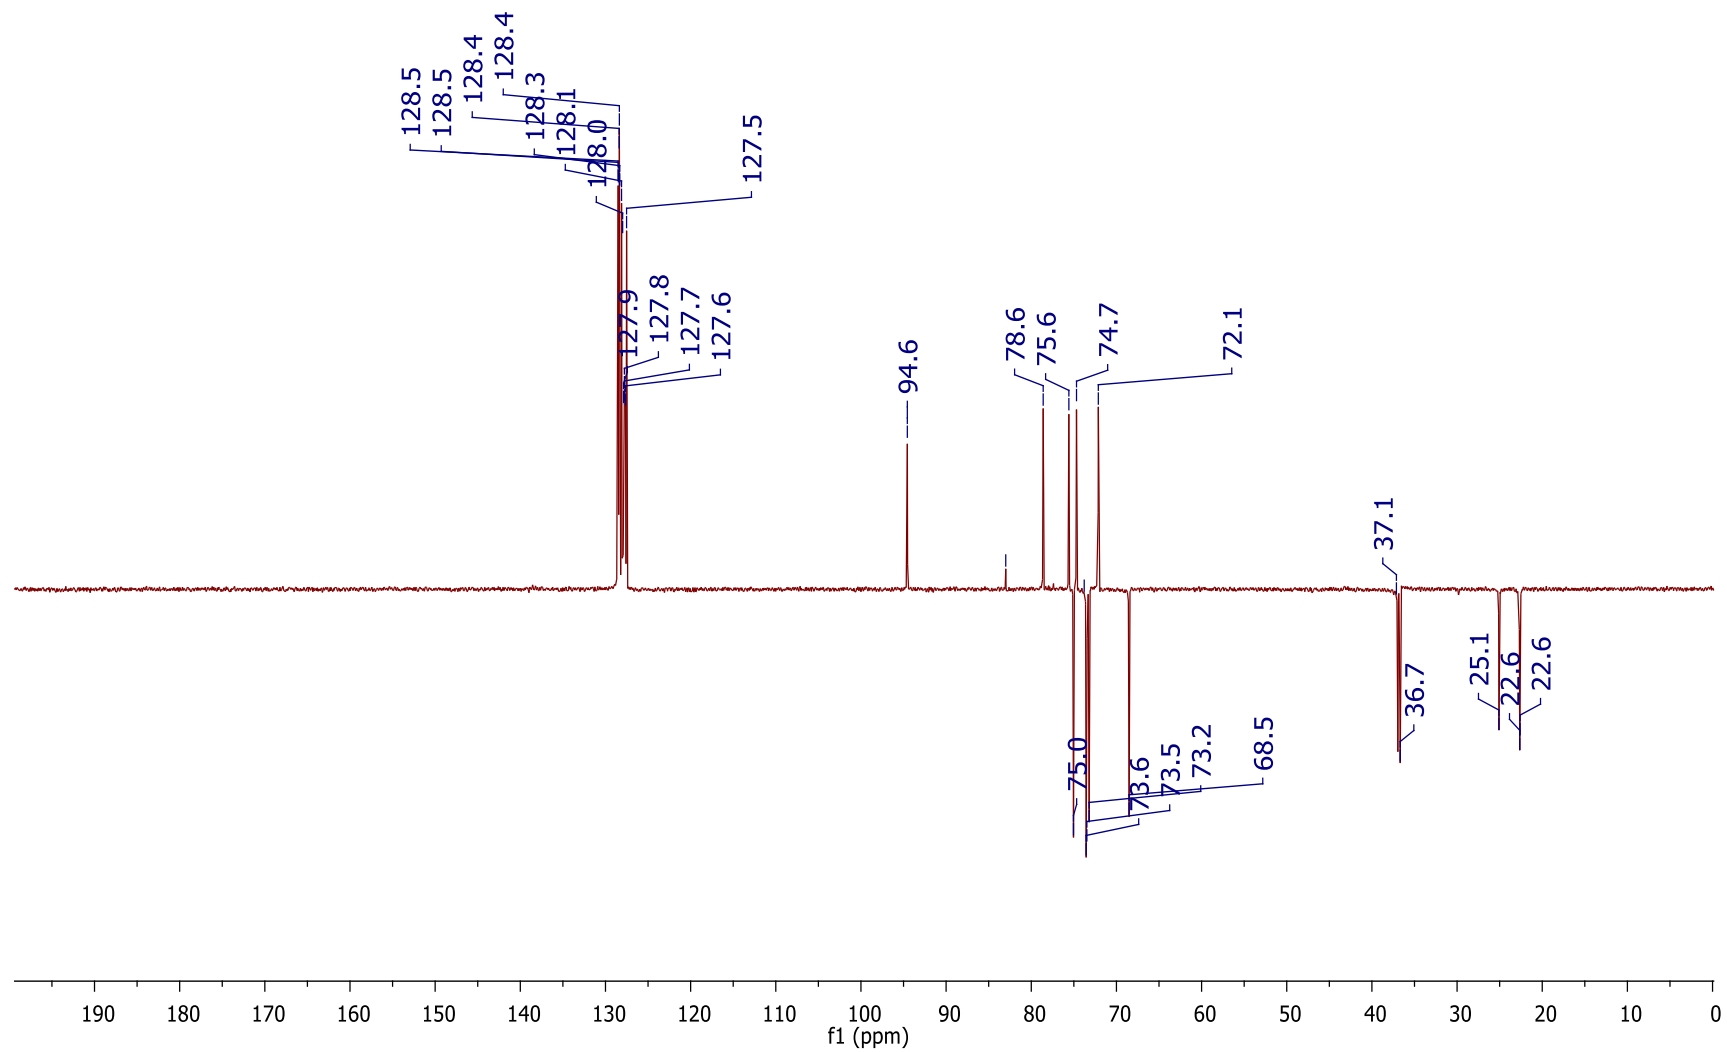



$^1\text{H}$  NMR Spectrum (400.31 MHz,  $\text{CDCl}_3$ ) of compound **6b**

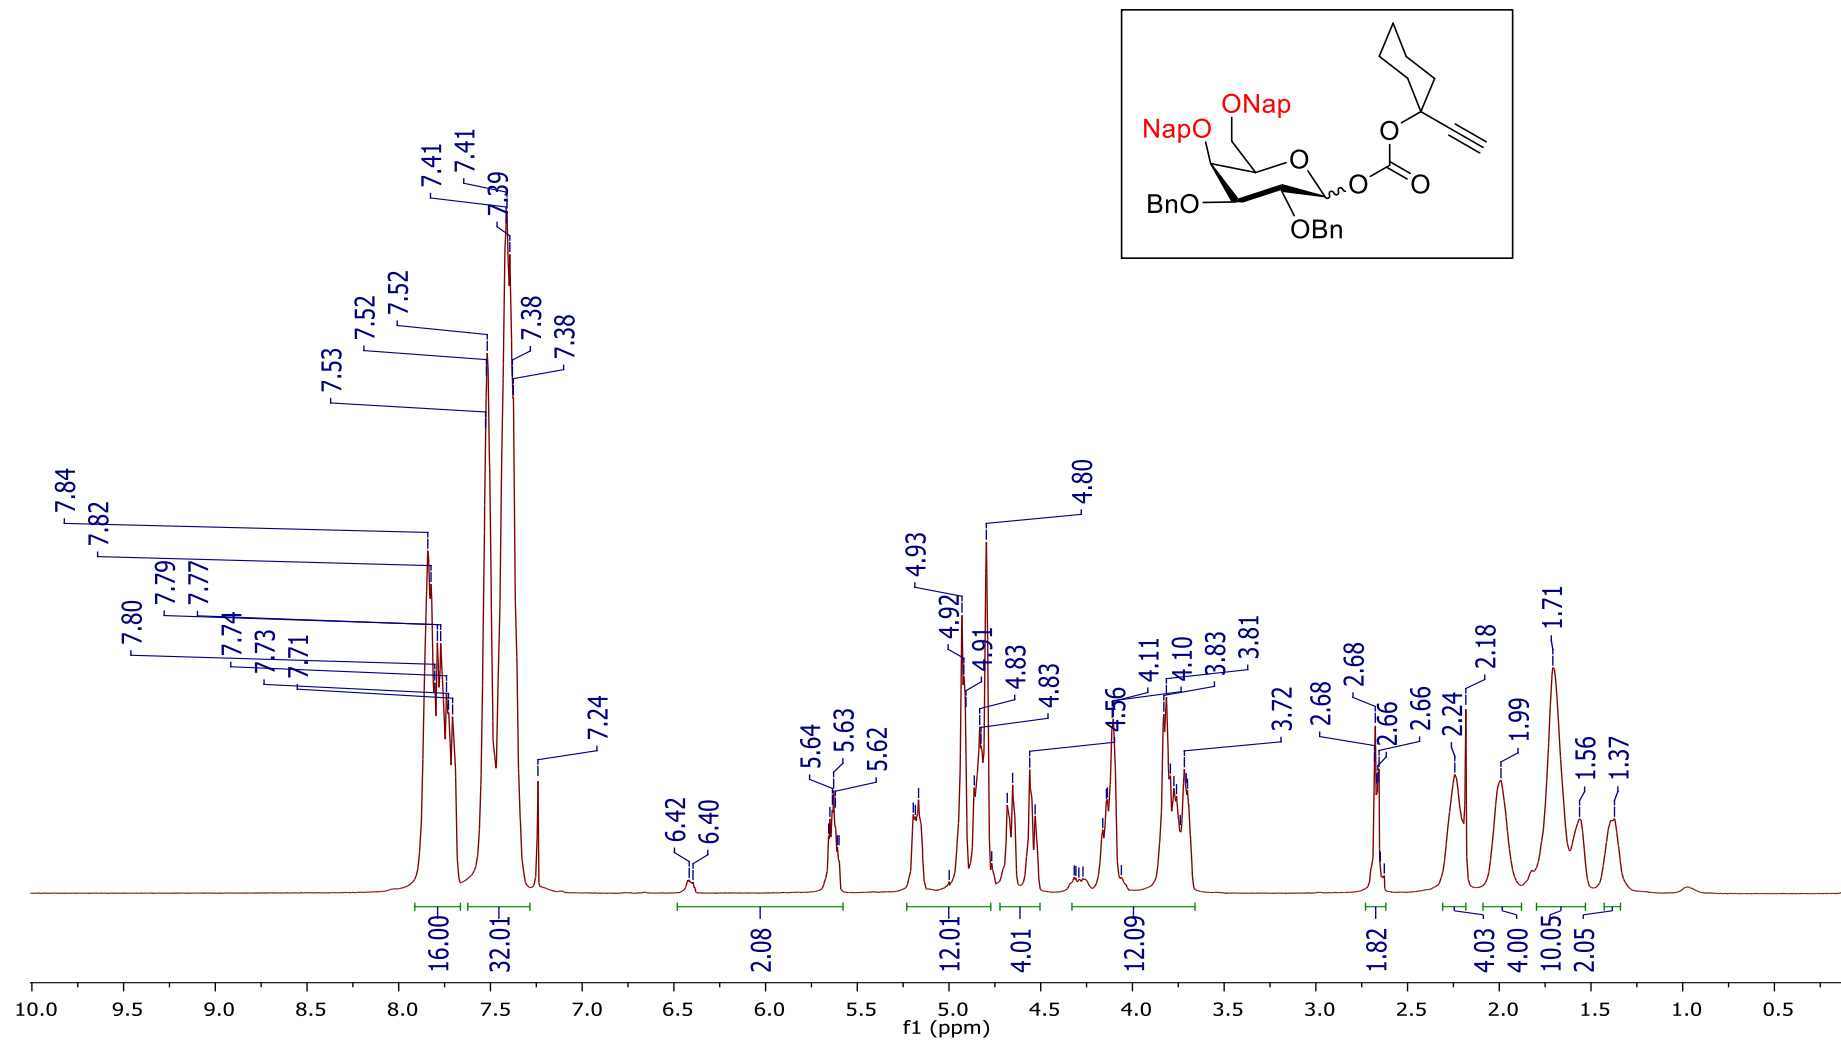

$^{13}\text{C}$  NMR Spectrum (100.67MHz,  $\text{CDCl}_3$ ) of compound **6b**

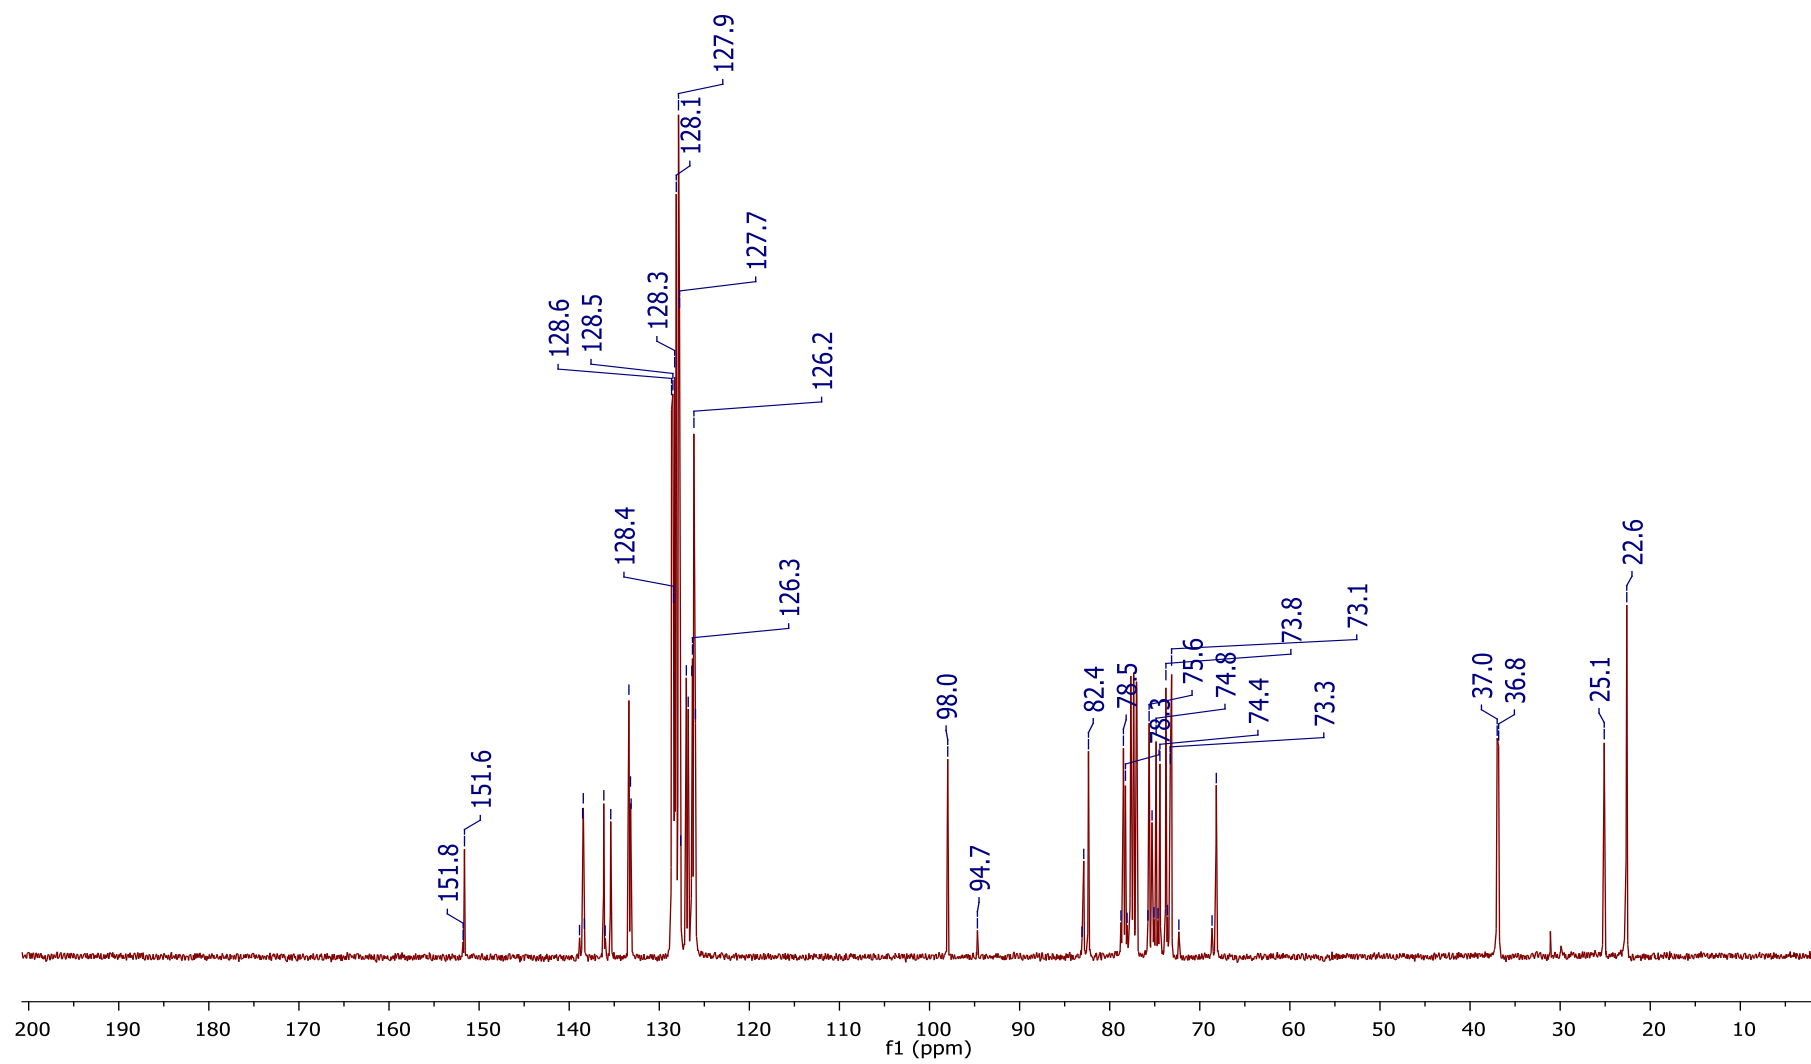

DEPT NMR Spectrum (100.67MHz, CDCl<sub>3</sub>) of compound **6b**

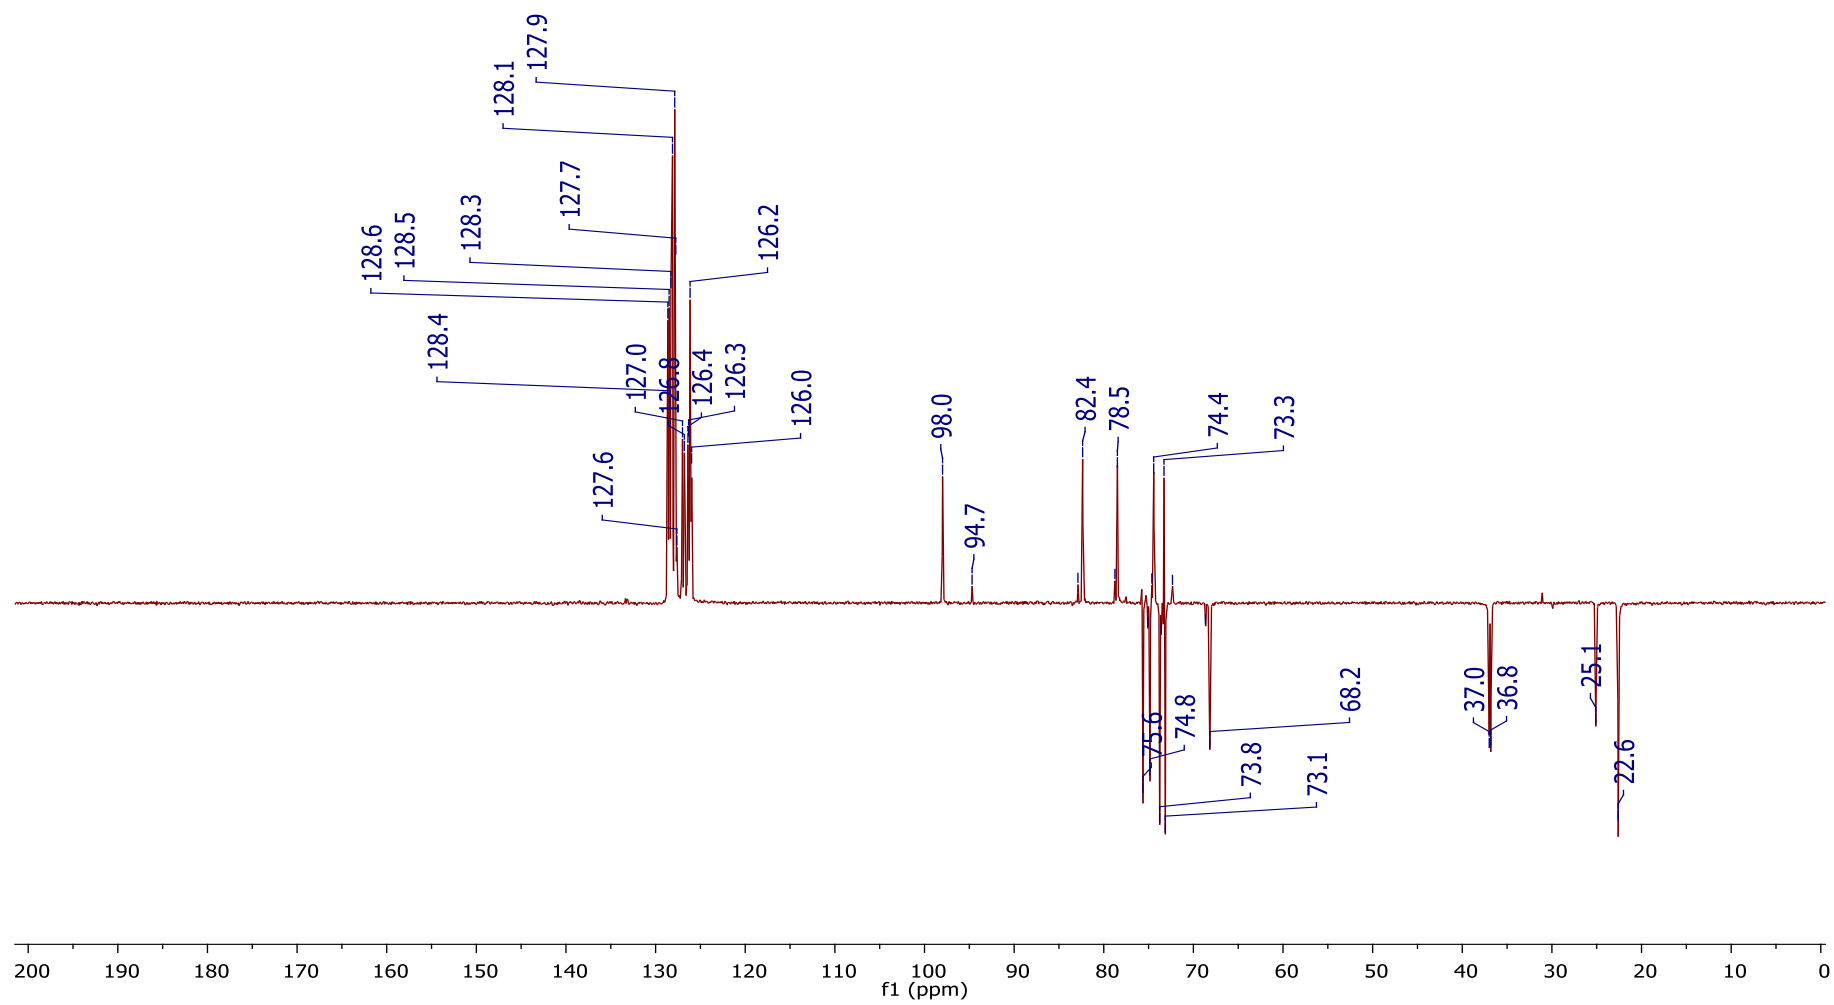

$^1\text{H}$  NMR Spectrum (400.31 MHz,  $\text{CDCl}_3$ ) of compound **6c**

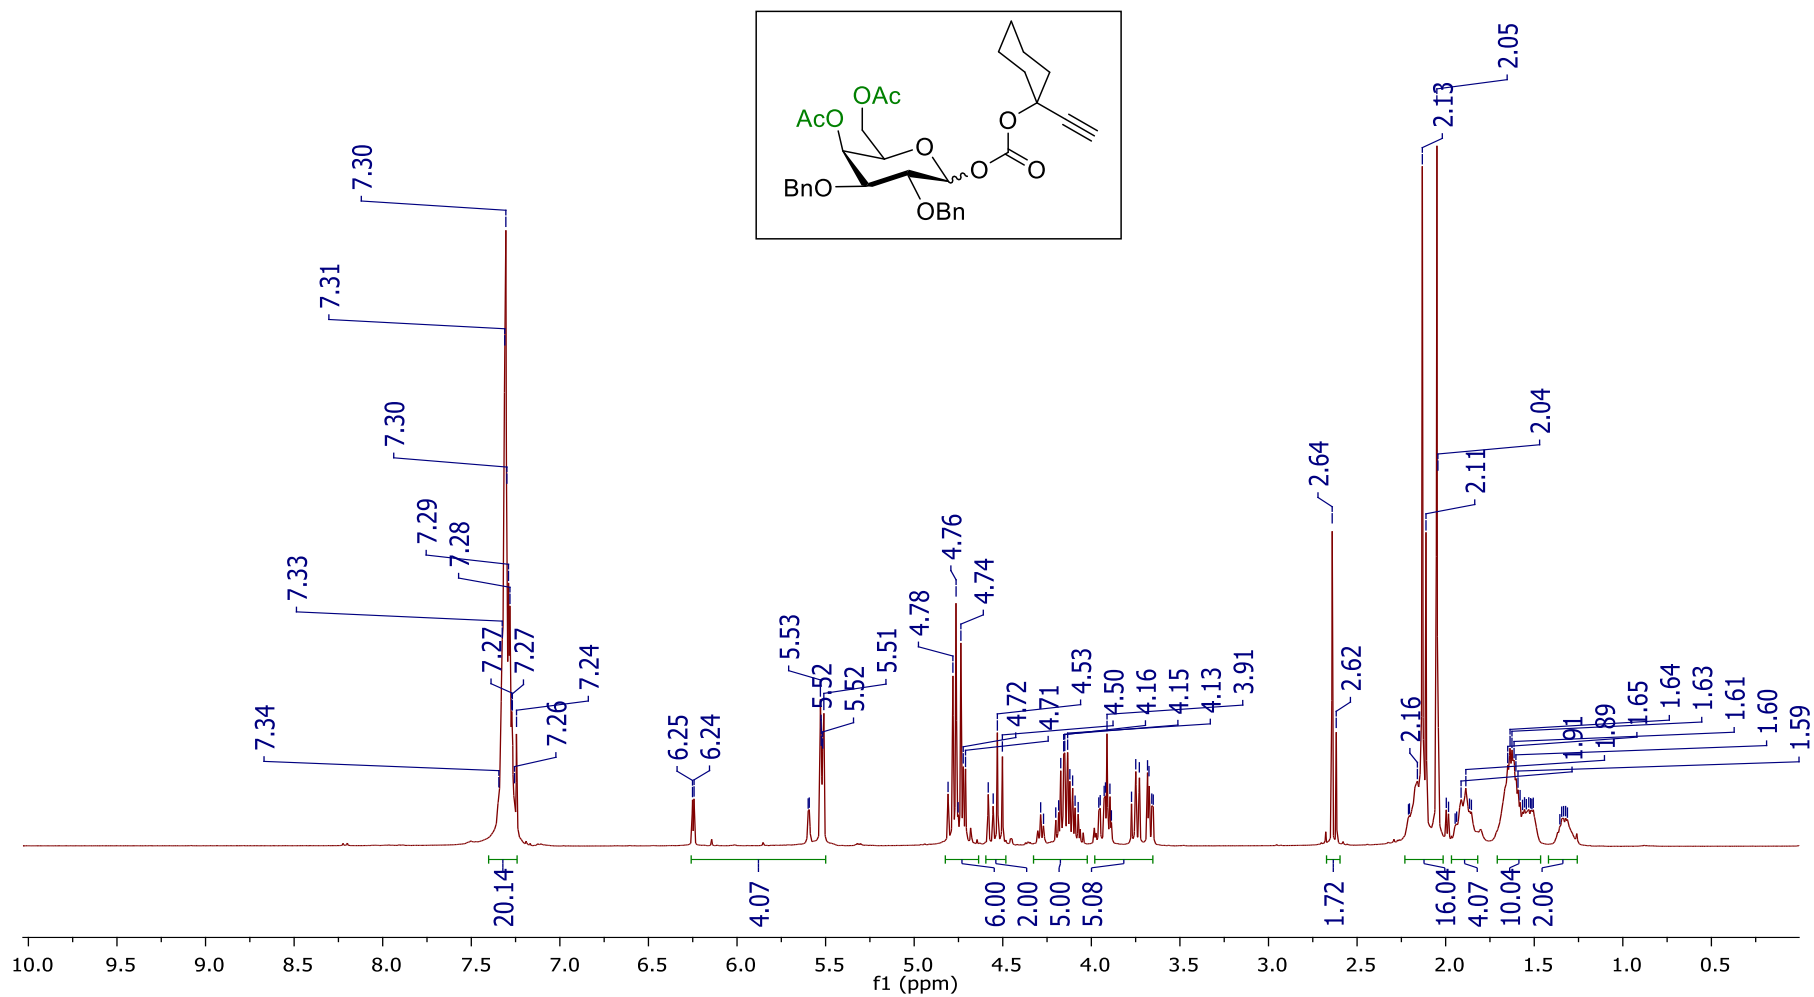

$^{13}\text{C}$  NMR Spectrum (100.67MHz,  $\text{CDCl}_3$ ) of compound **6c**

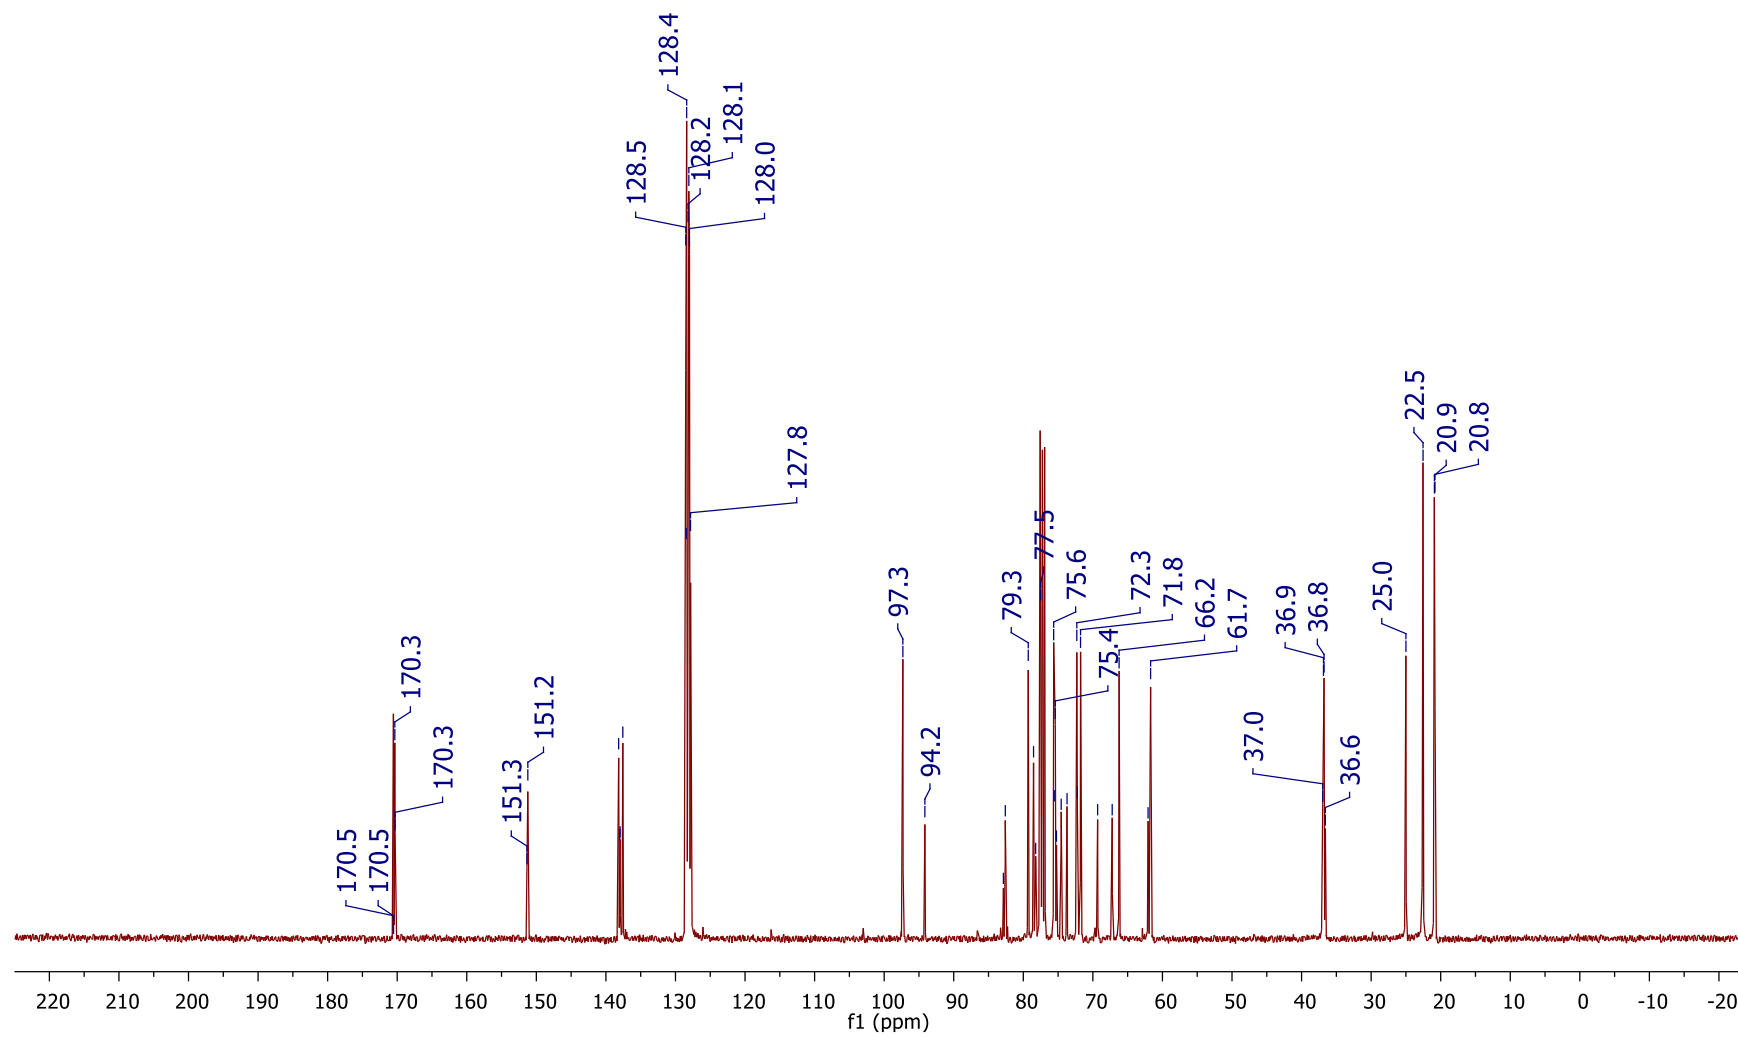

DEPT NMR Spectrum (100.67MHz, CDCl<sub>3</sub>) of compound **6c**

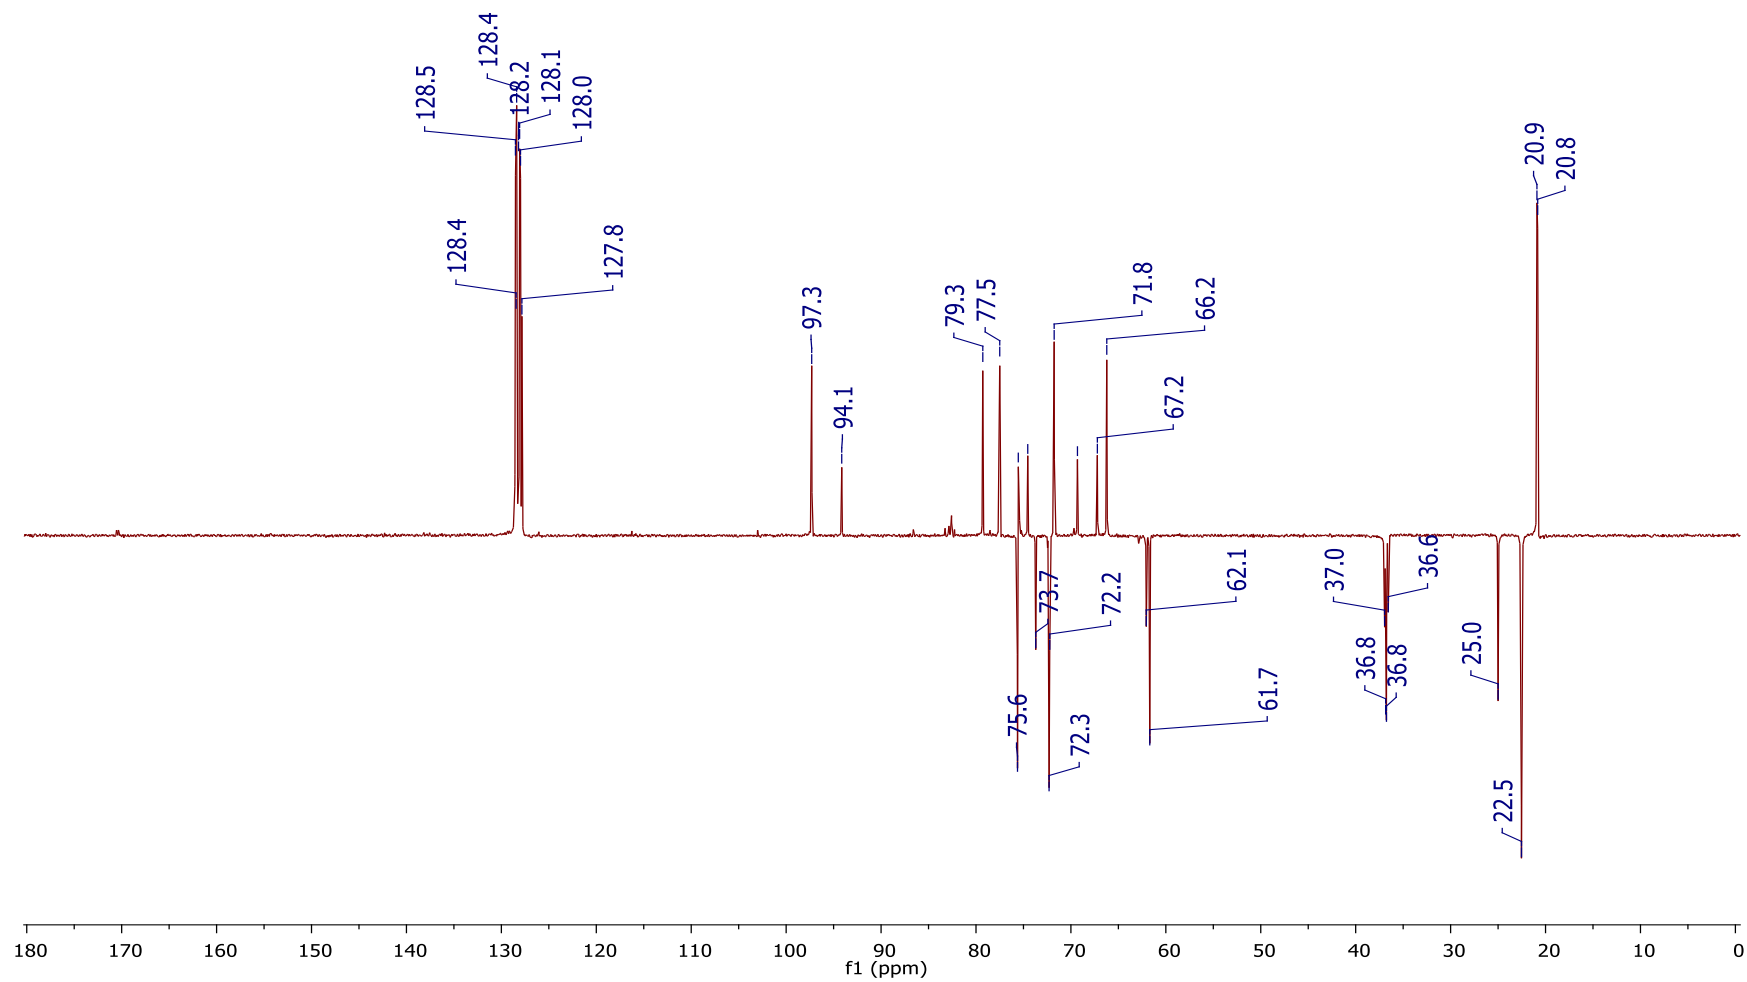

$^1\text{H}$  NMR Spectrum (400.31 MHz,  $\text{CDCl}_3$ ) of compound **6d**

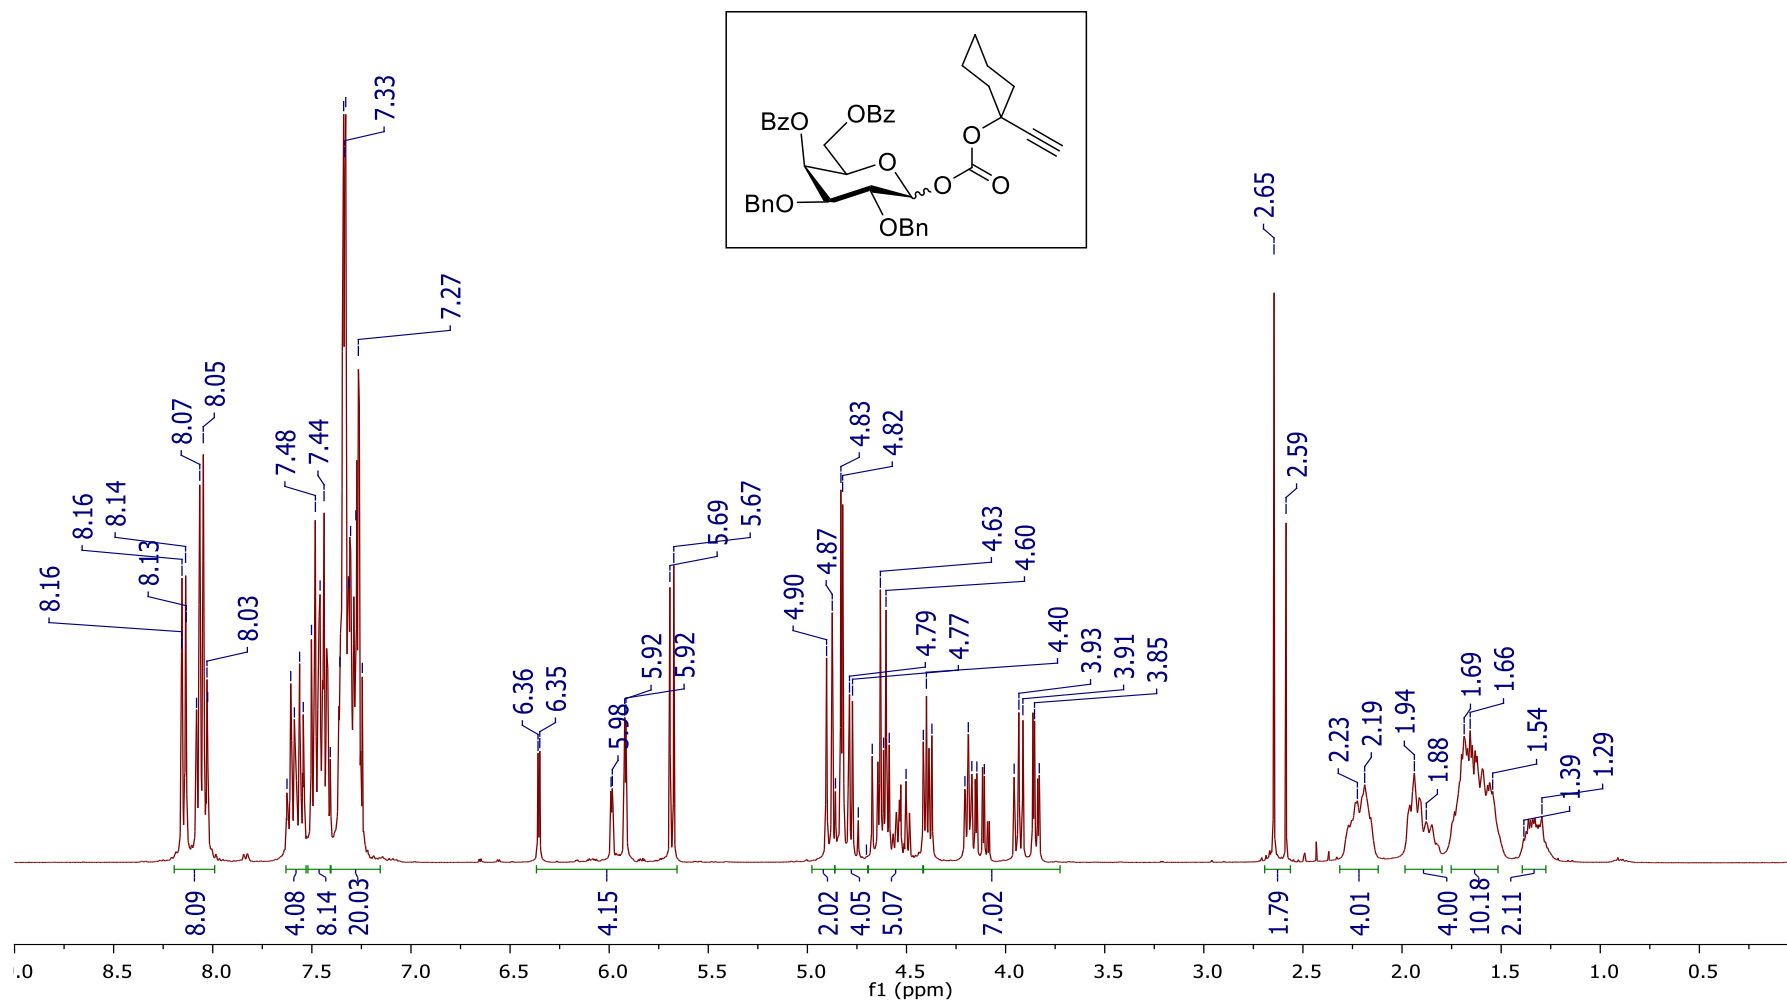

$^{13}\text{C}$  NMR Spectrum (100.67MHz,  $\text{CDCl}_3$ ) of compound **6d**

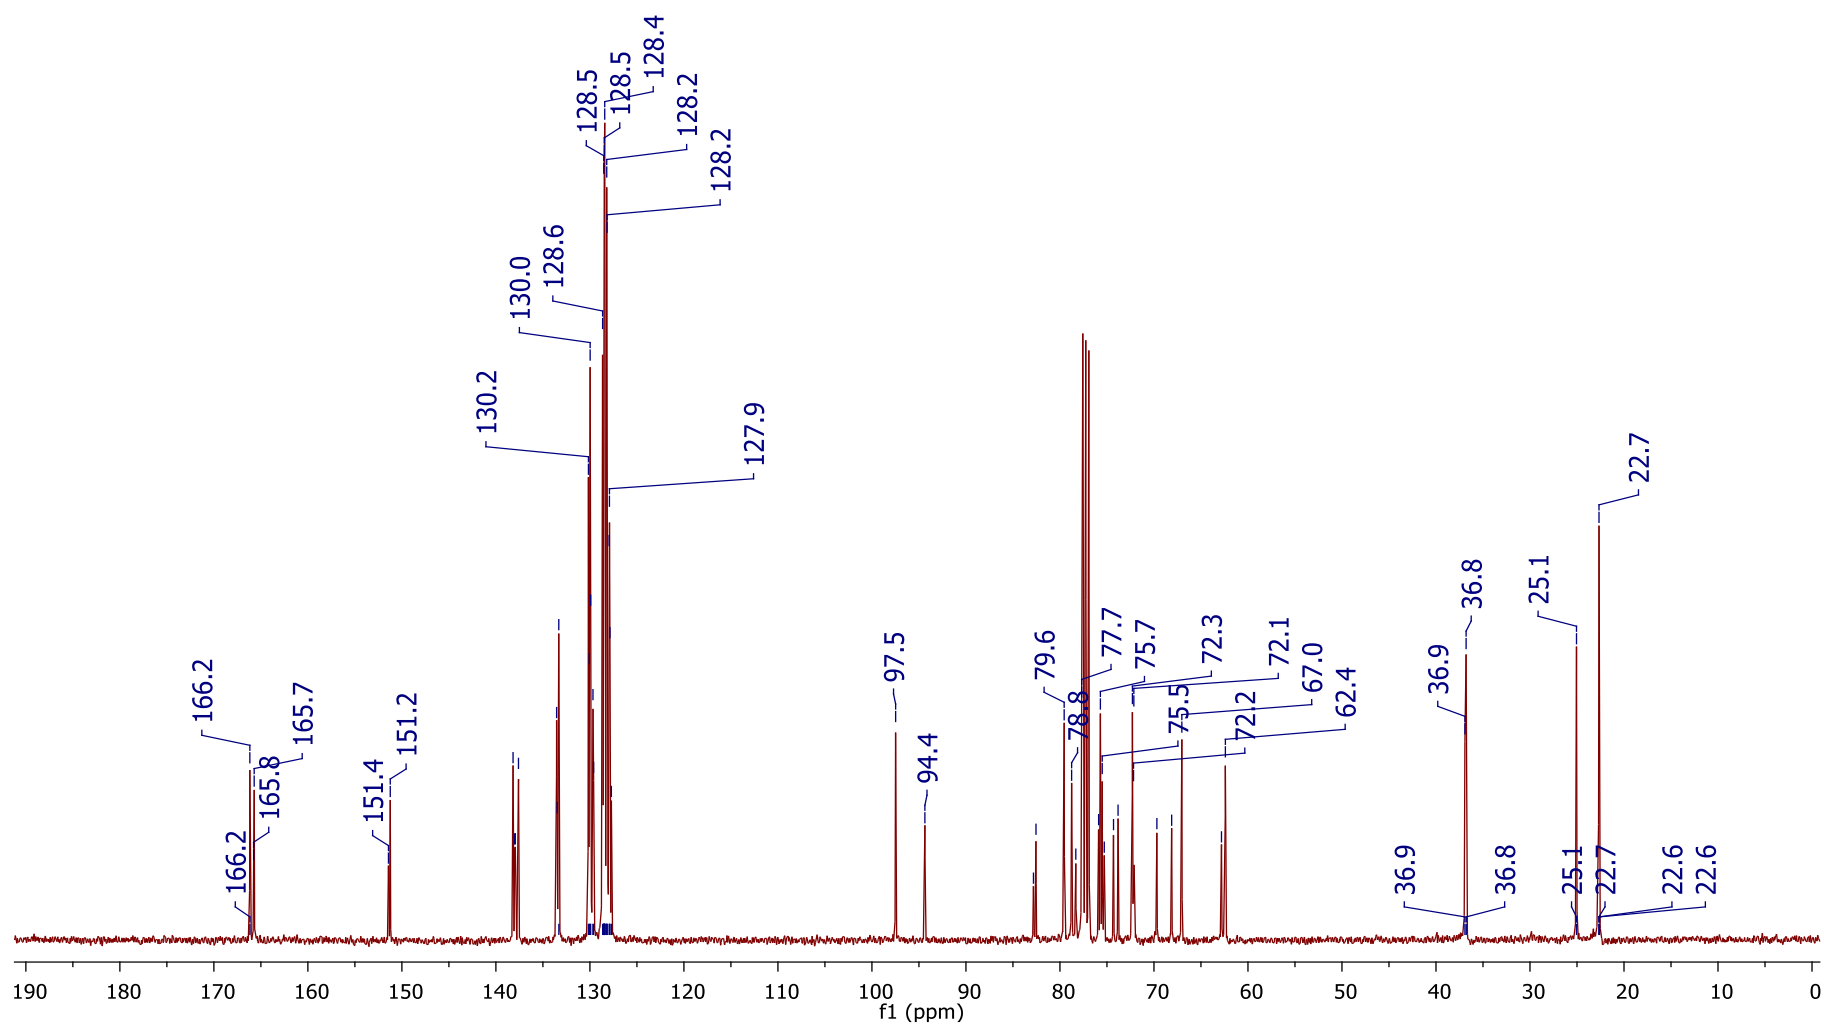



DEPT NMR Spectrum (100.67MHz, CDCl<sub>3</sub>) of compound **6d**

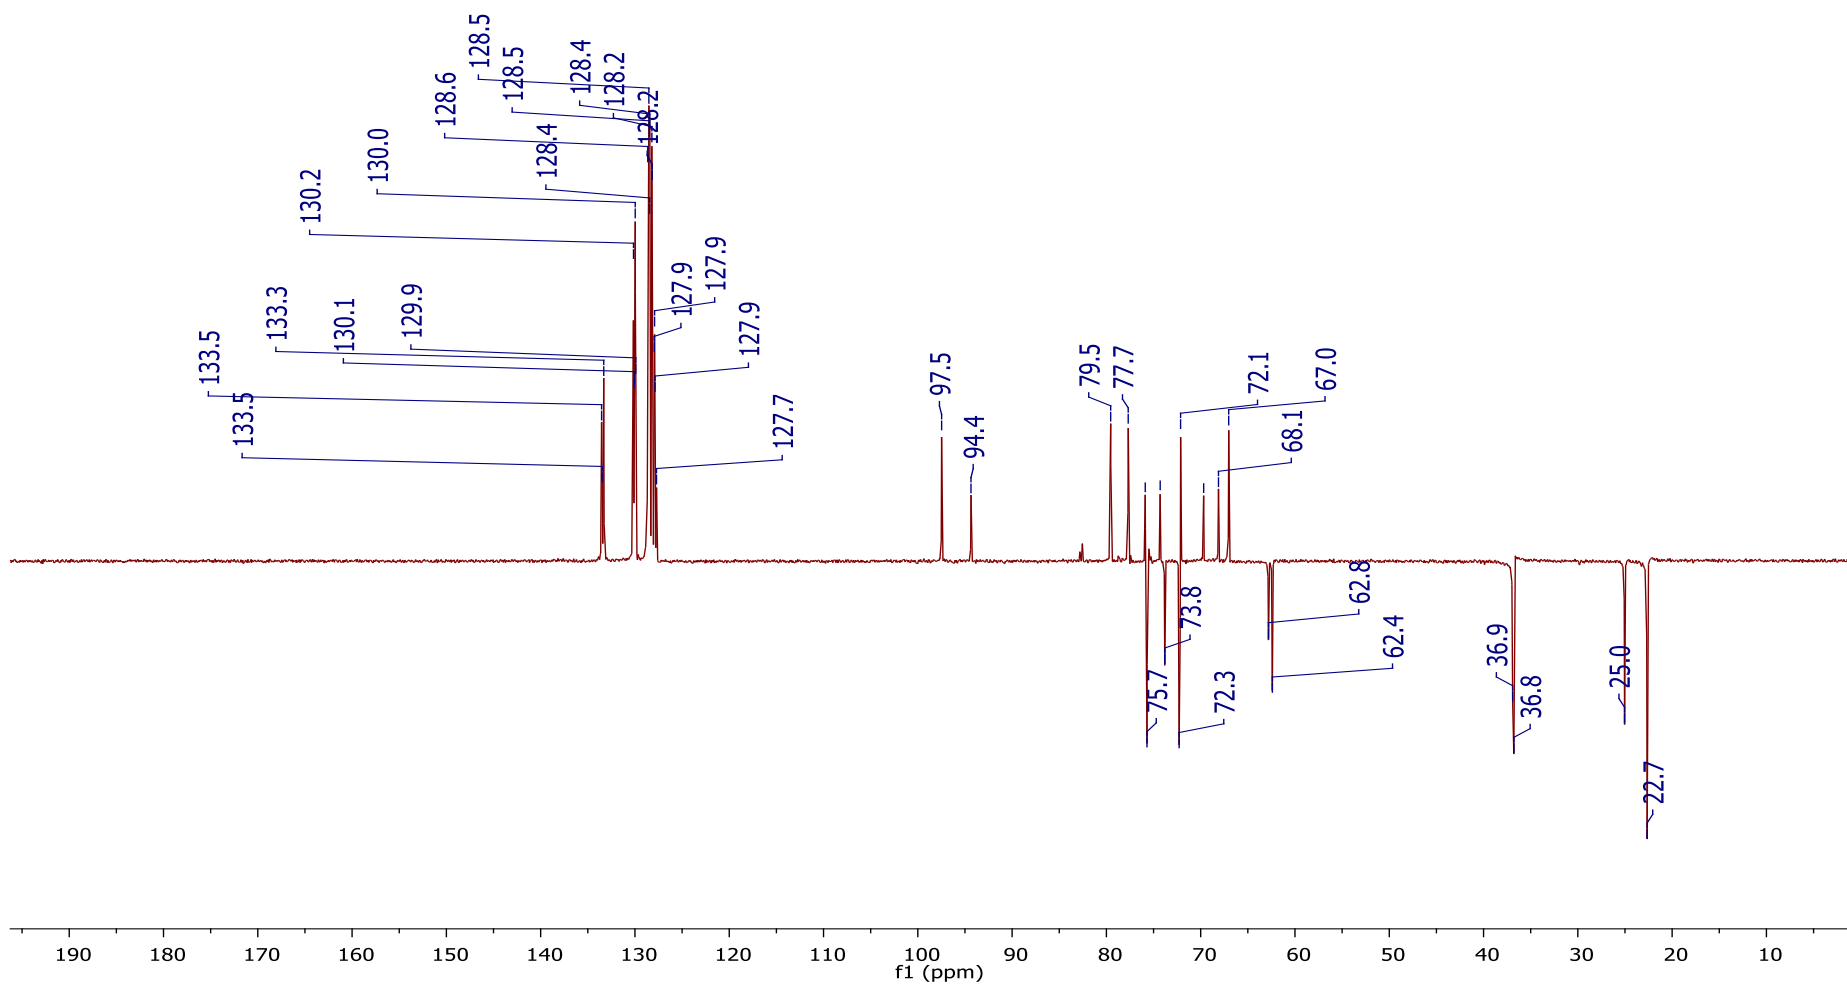

<sup>1</sup>H NMR Spectrum (400.31 MHz, CDCl<sub>3</sub>) of compound **6e**

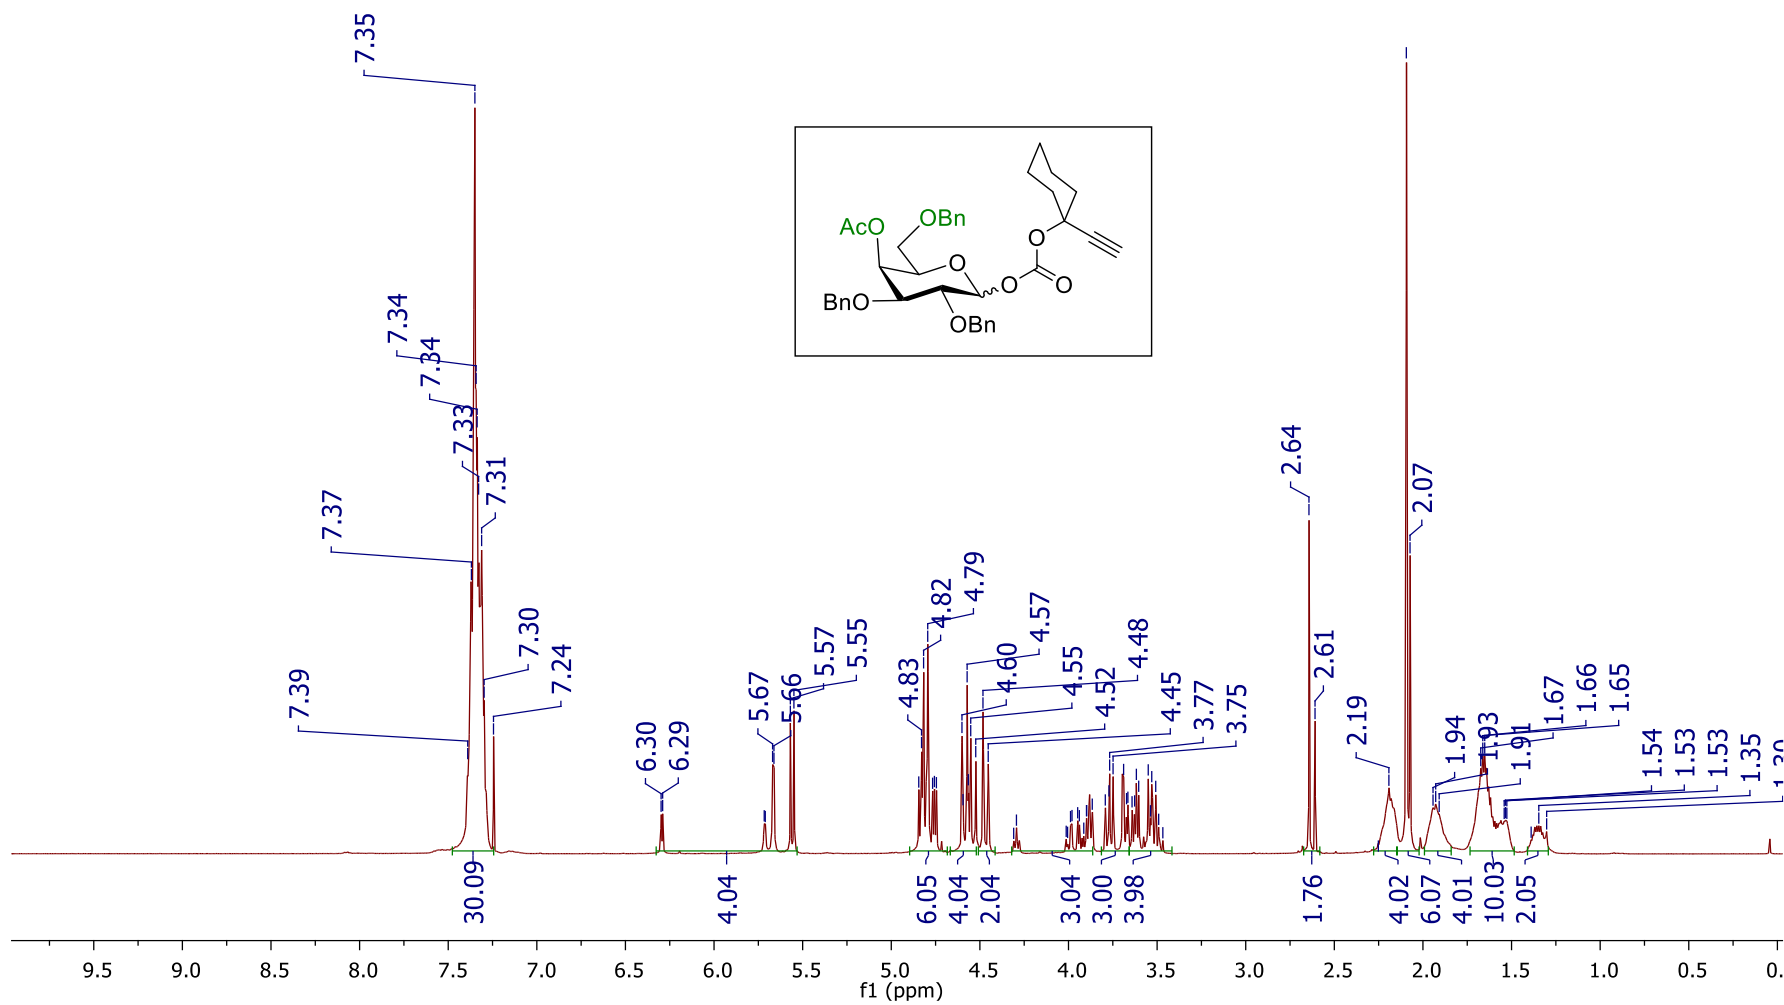

$^{13}\text{C}$  NMR Spectrum (100.67MHz,  $\text{CDCl}_3$ ) of compound **6e**

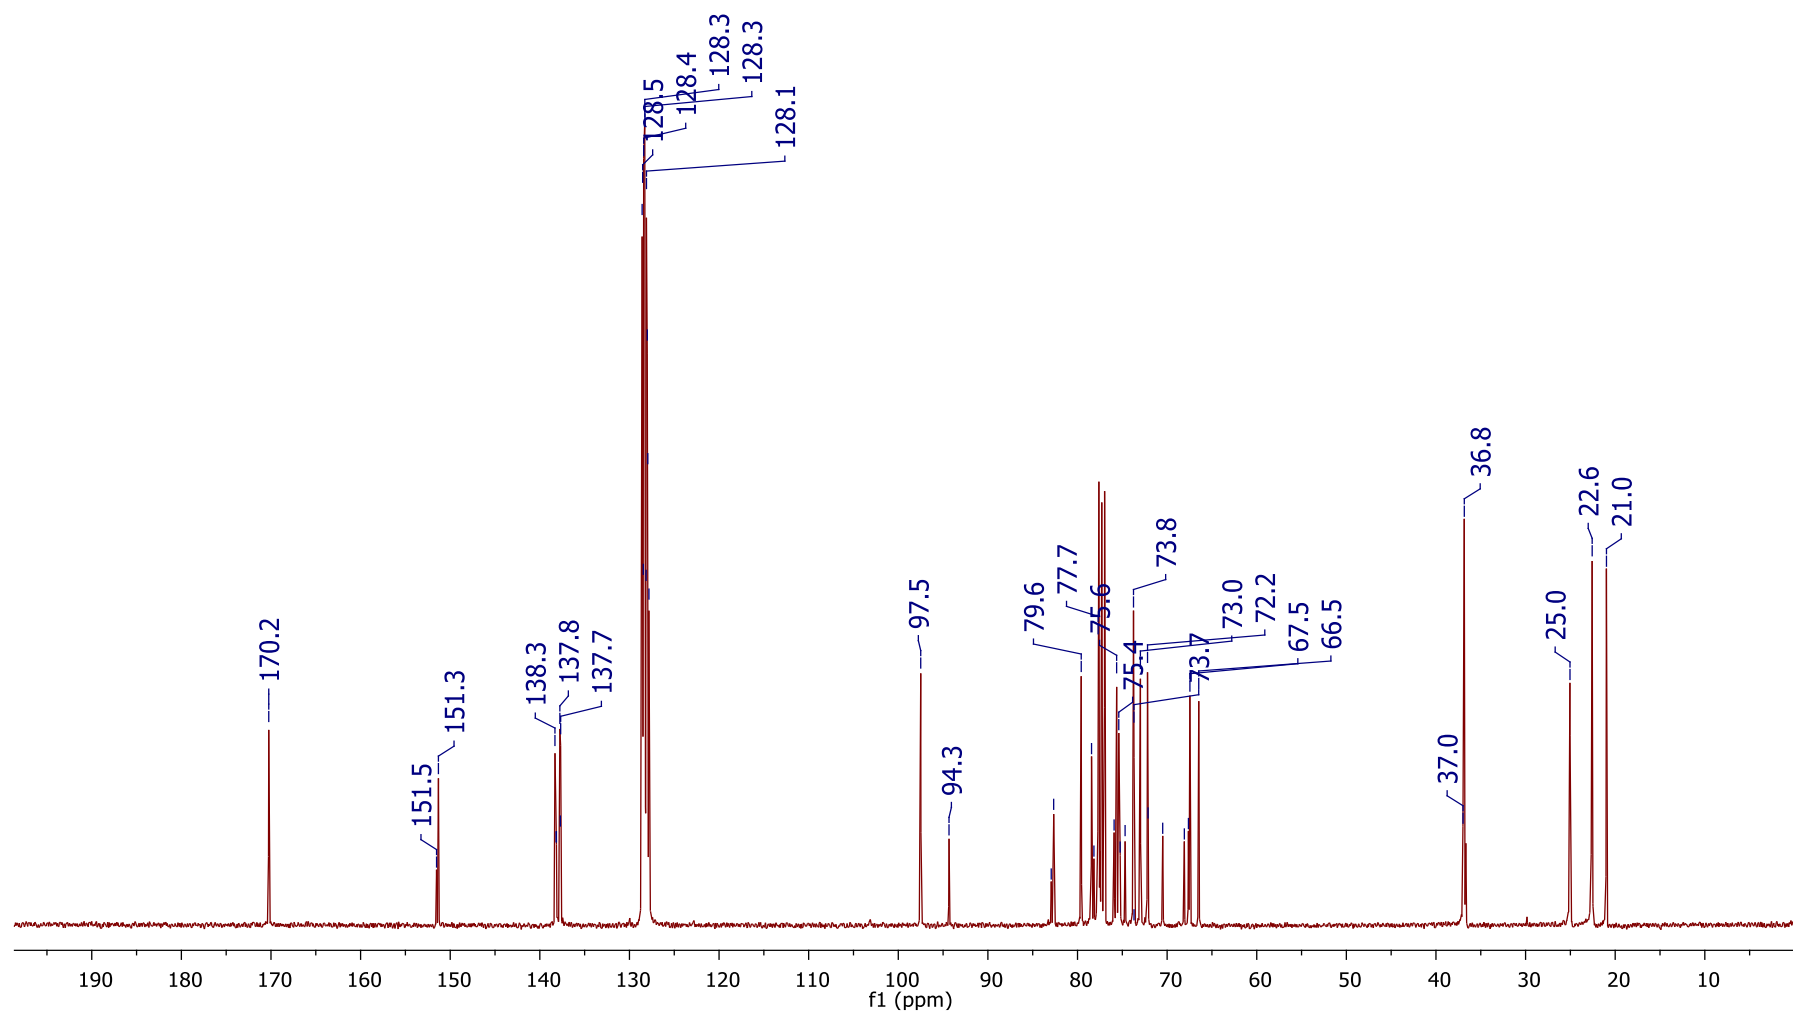

DEPT NMR Spectrum (100.67MHz, CDCl<sub>3</sub>) of compound **6e**

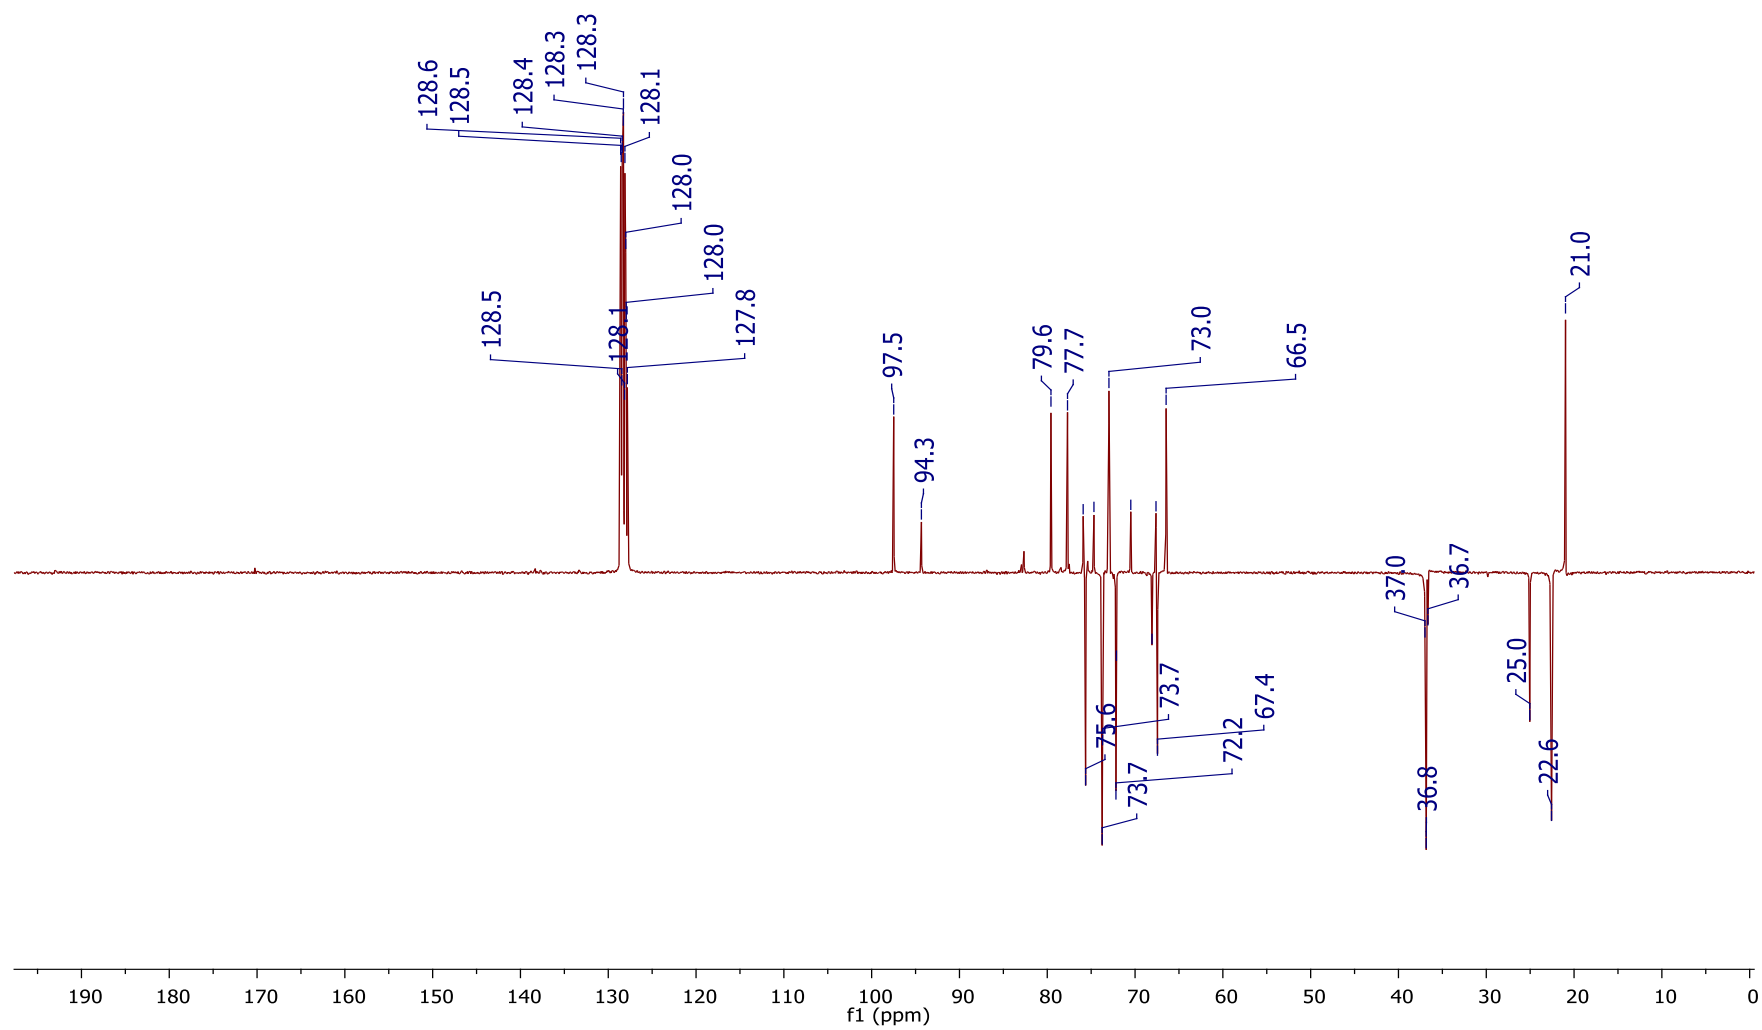

$^1\text{H}$  NMR Spectrum (400.31 MHz,  $\text{CDCl}_3$ ) of compound **6f**

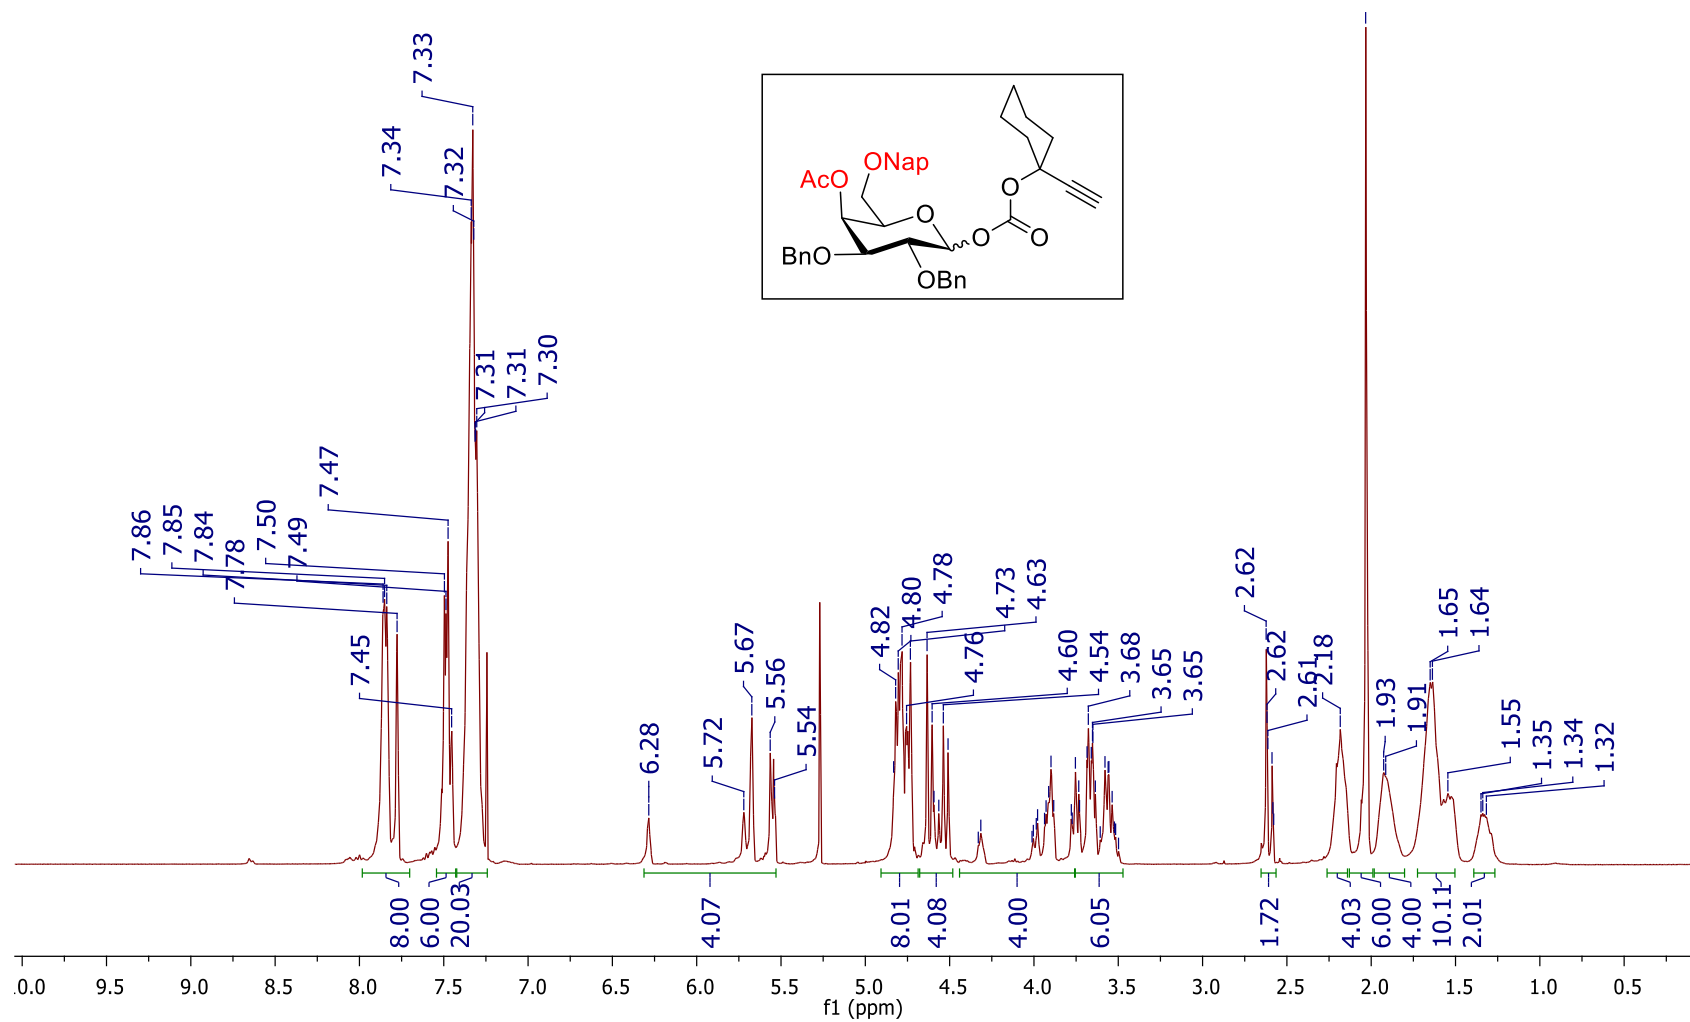

$^{13}\text{C}$  NMR Spectrum (100.67MHz,  $\text{CDCl}_3$ ) of compound **6f**

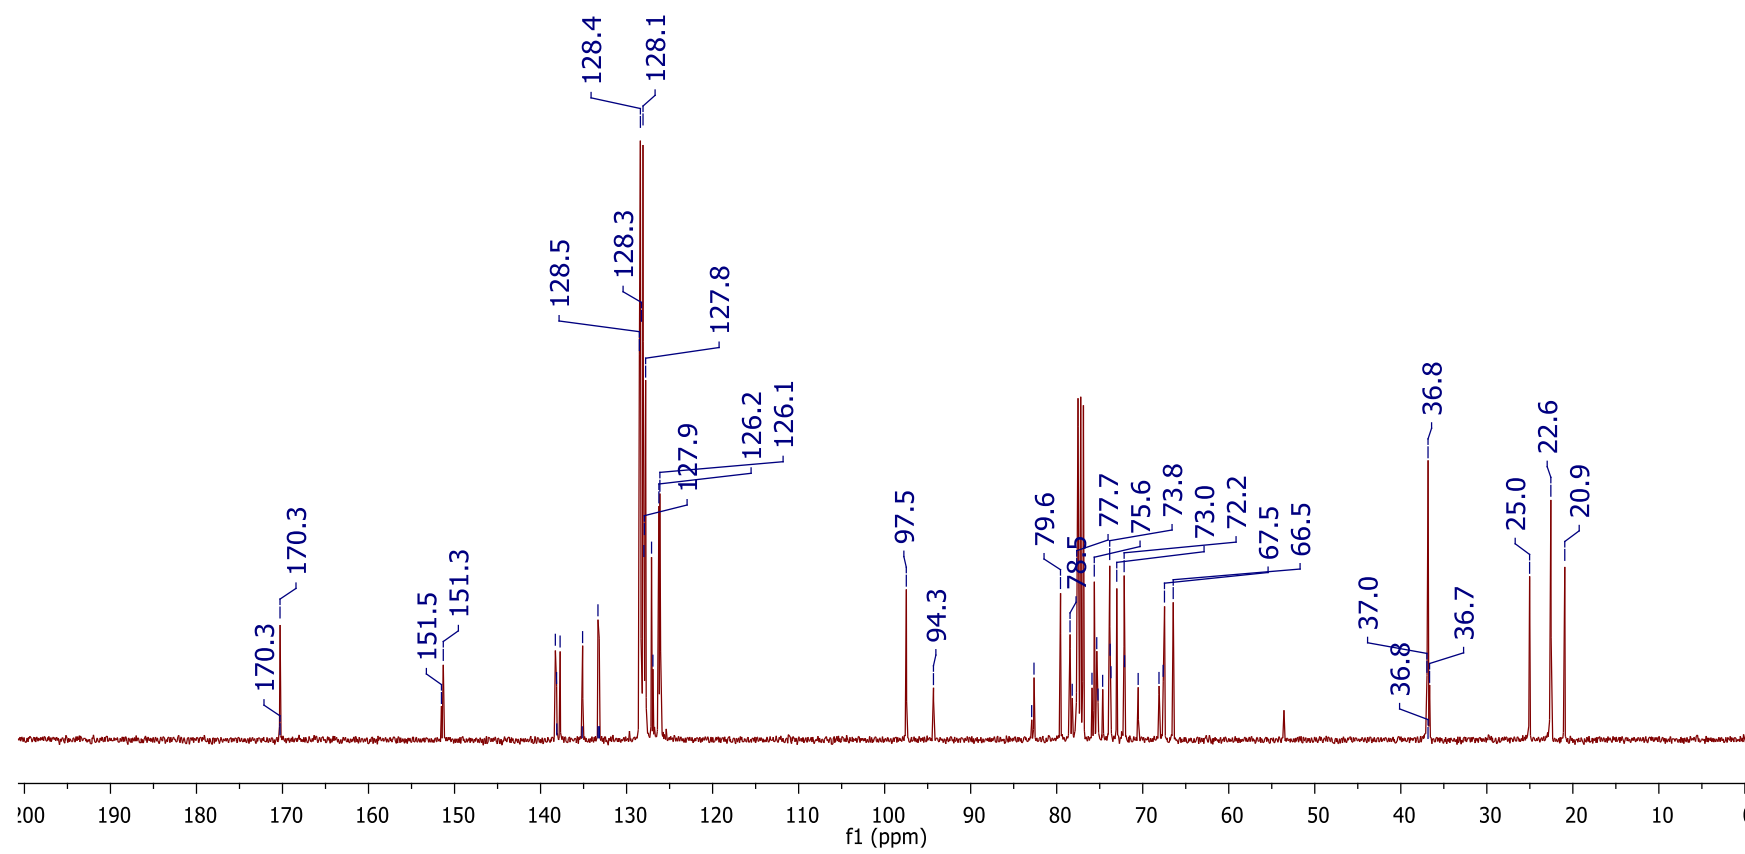

DEPT NMR Spectrum (100.67MHz, CDCl<sub>3</sub>) of compound **6f**

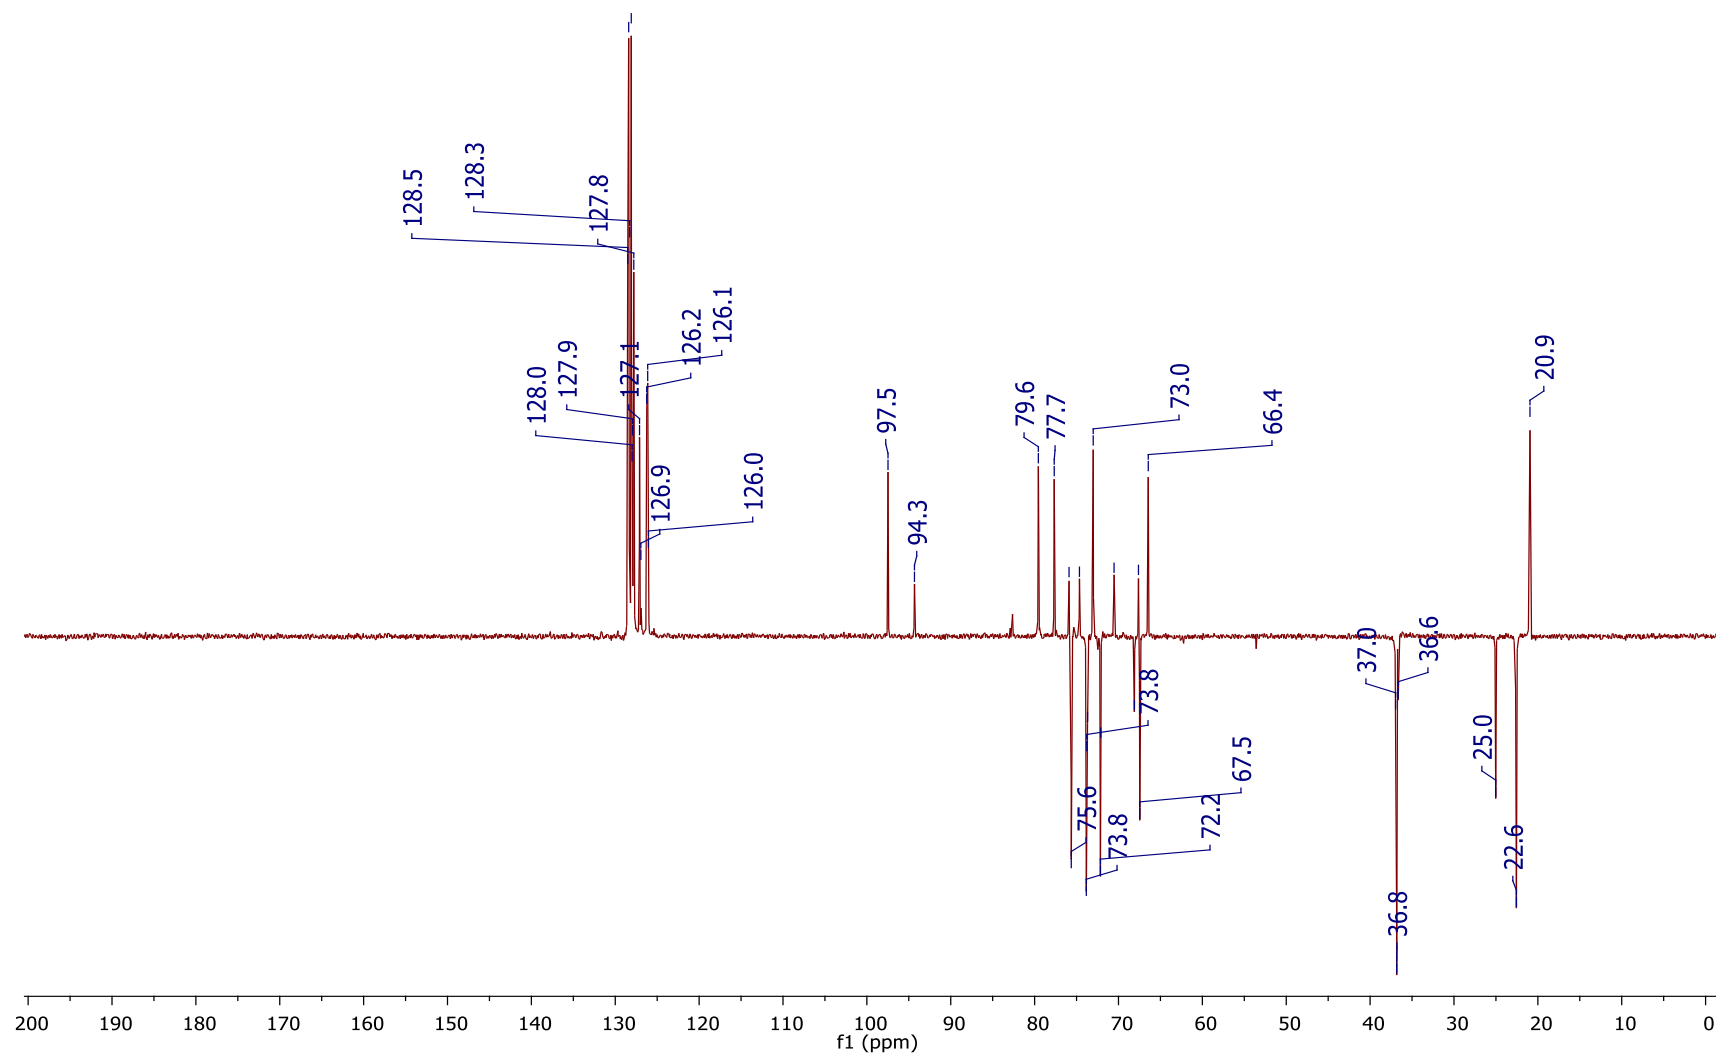

<sup>1</sup>H NMR Spectrum (400.31 MHz, CDCl<sub>3</sub>) of compound **6g**

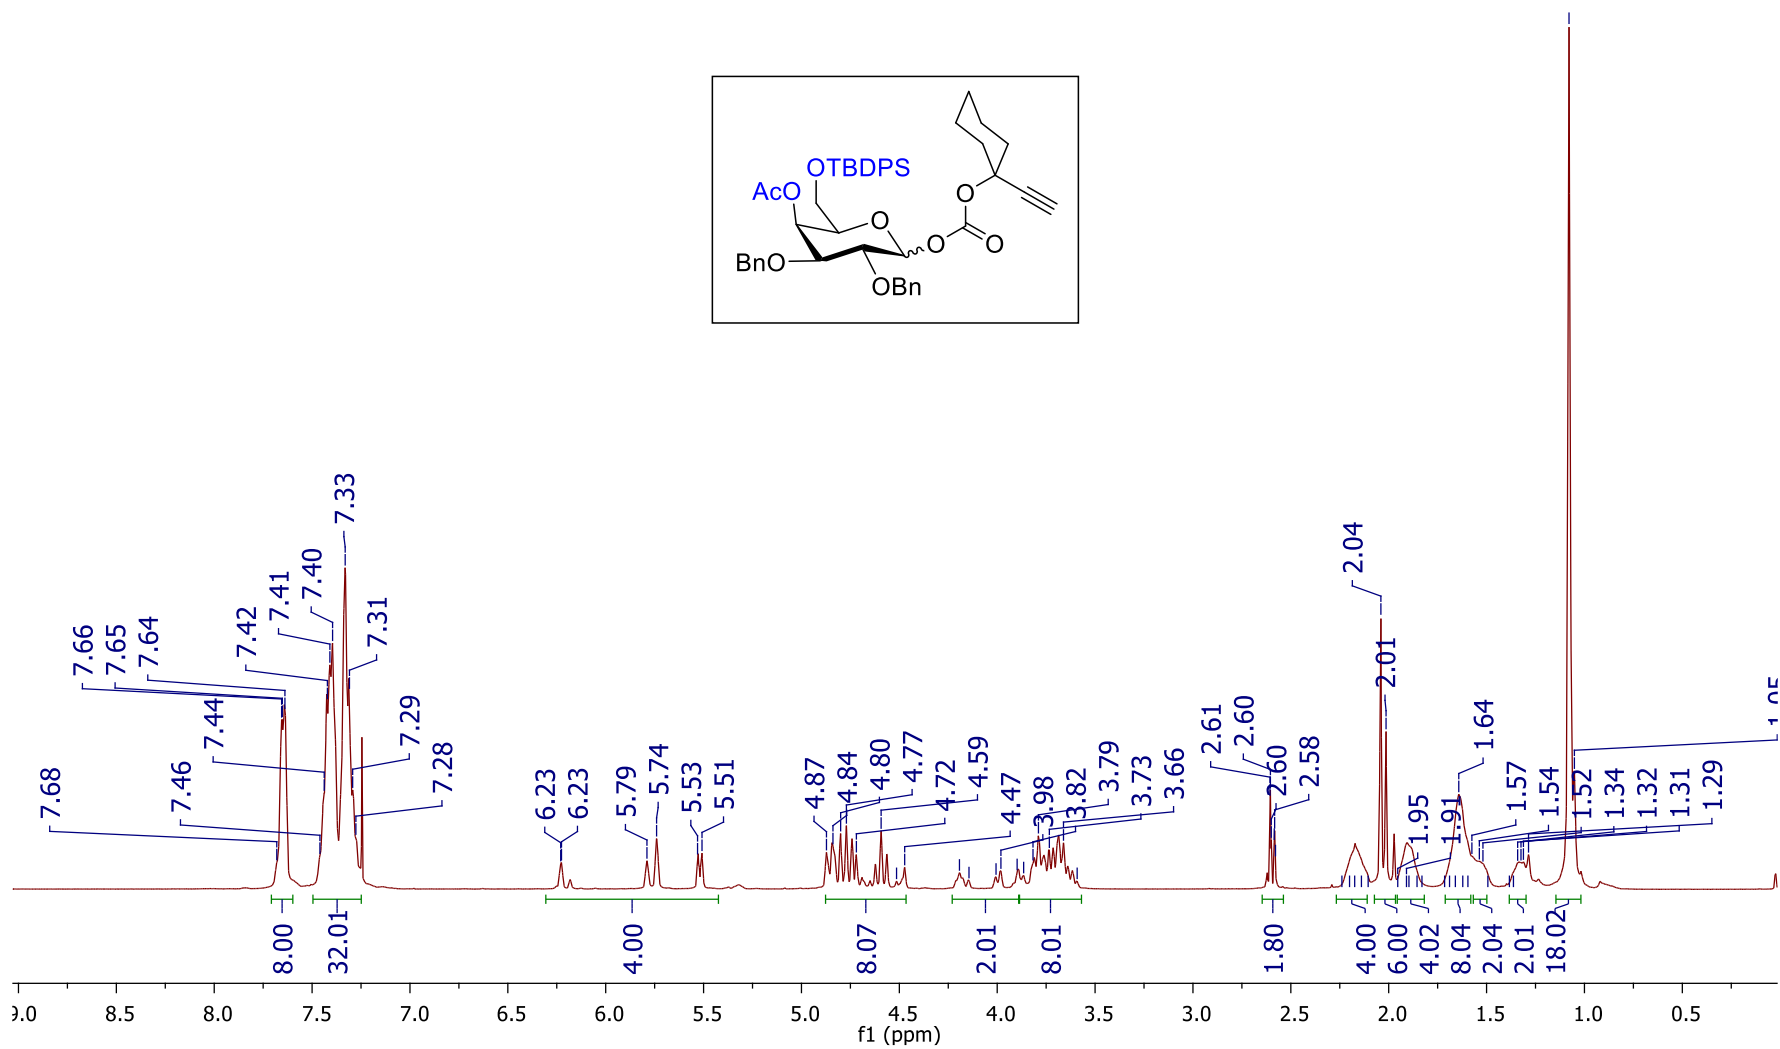



$^{13}\text{C}$  NMR Spectrum (100.67MHz,  $\text{CDCl}_3$ ) of compound **6g**

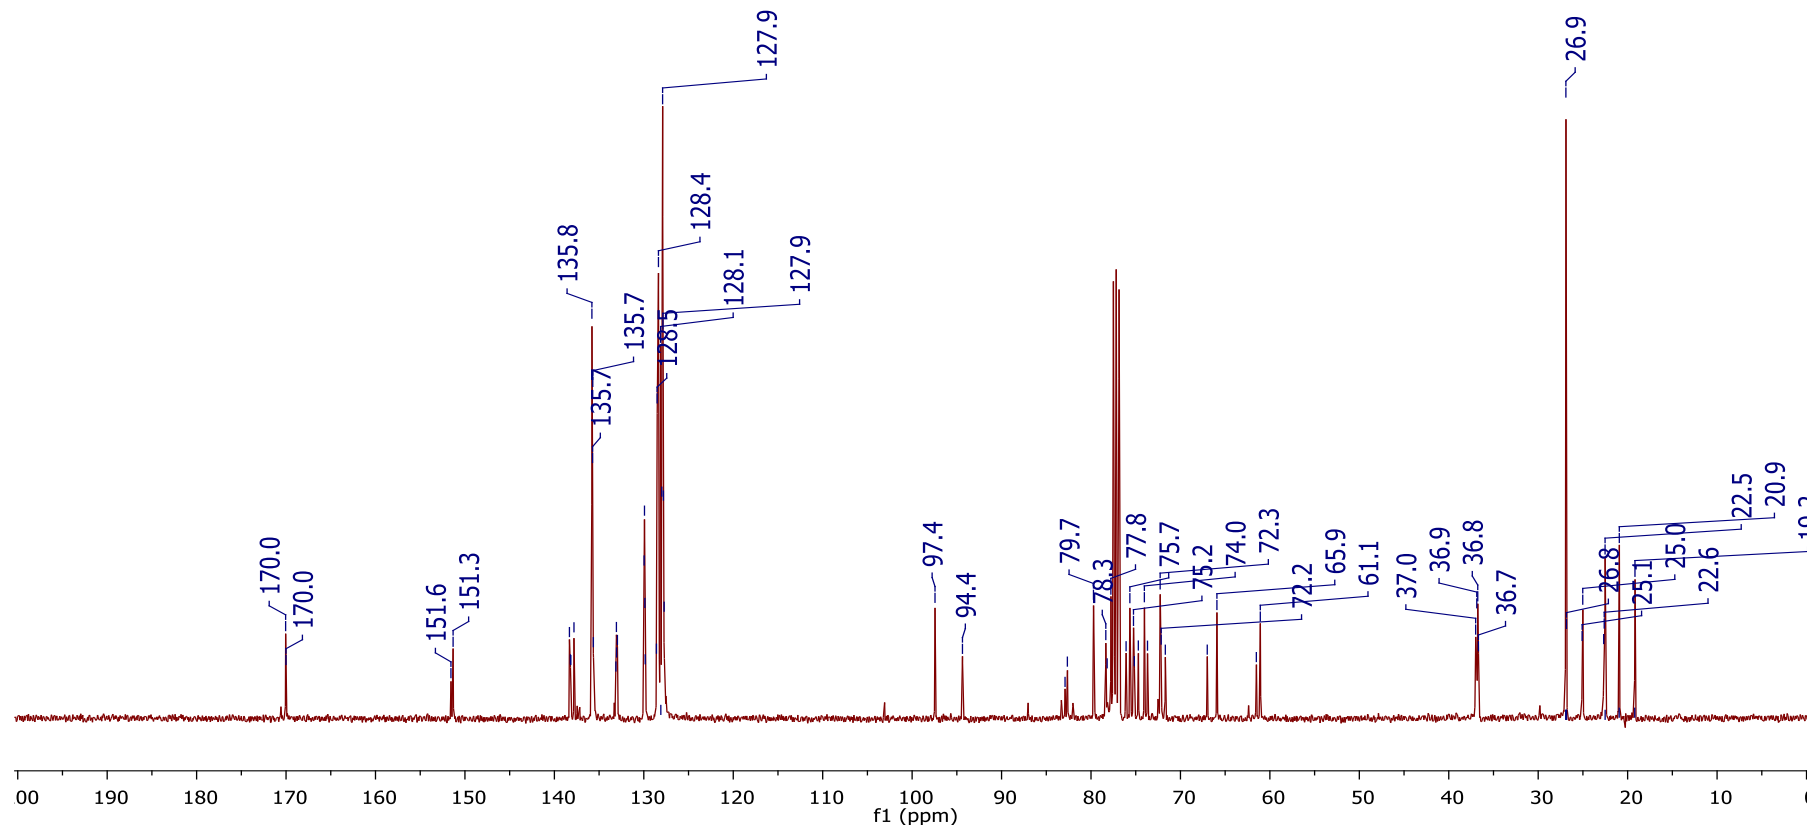

DEPT NMR Spectrum (100.67MHz, CDCl<sub>3</sub>) of compound **6g**

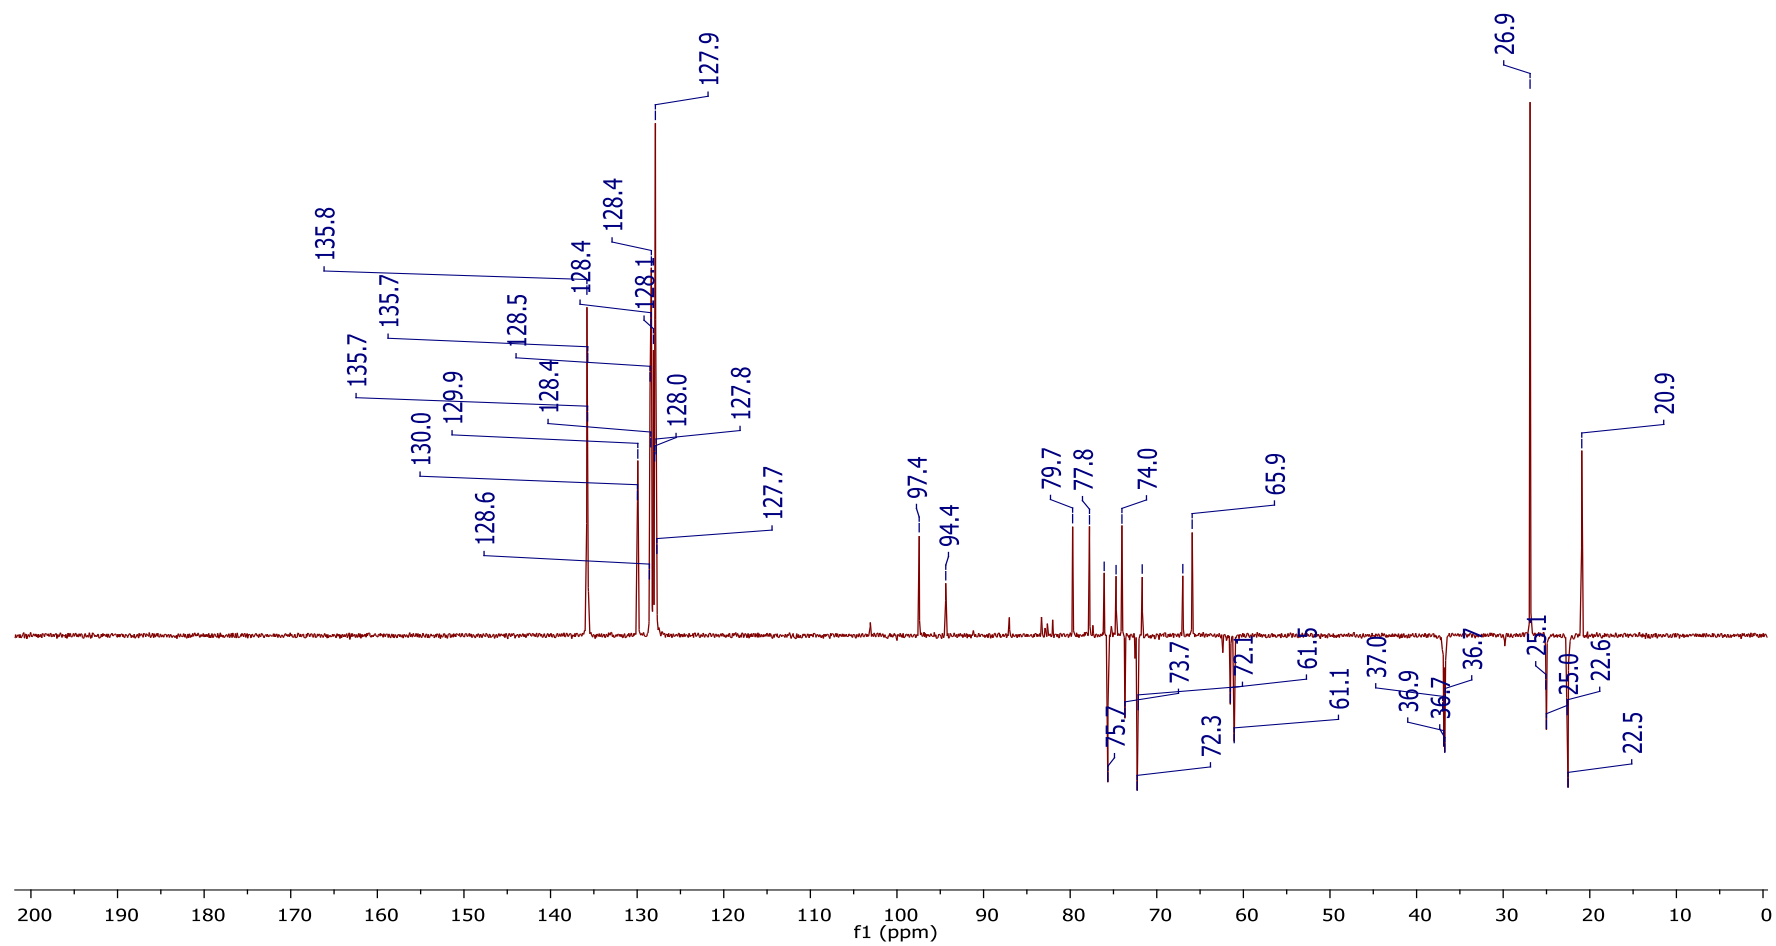

<sup>1</sup>H NMR Spectrum (400.31 MHz, CDCl<sub>3</sub>) of compound **19**

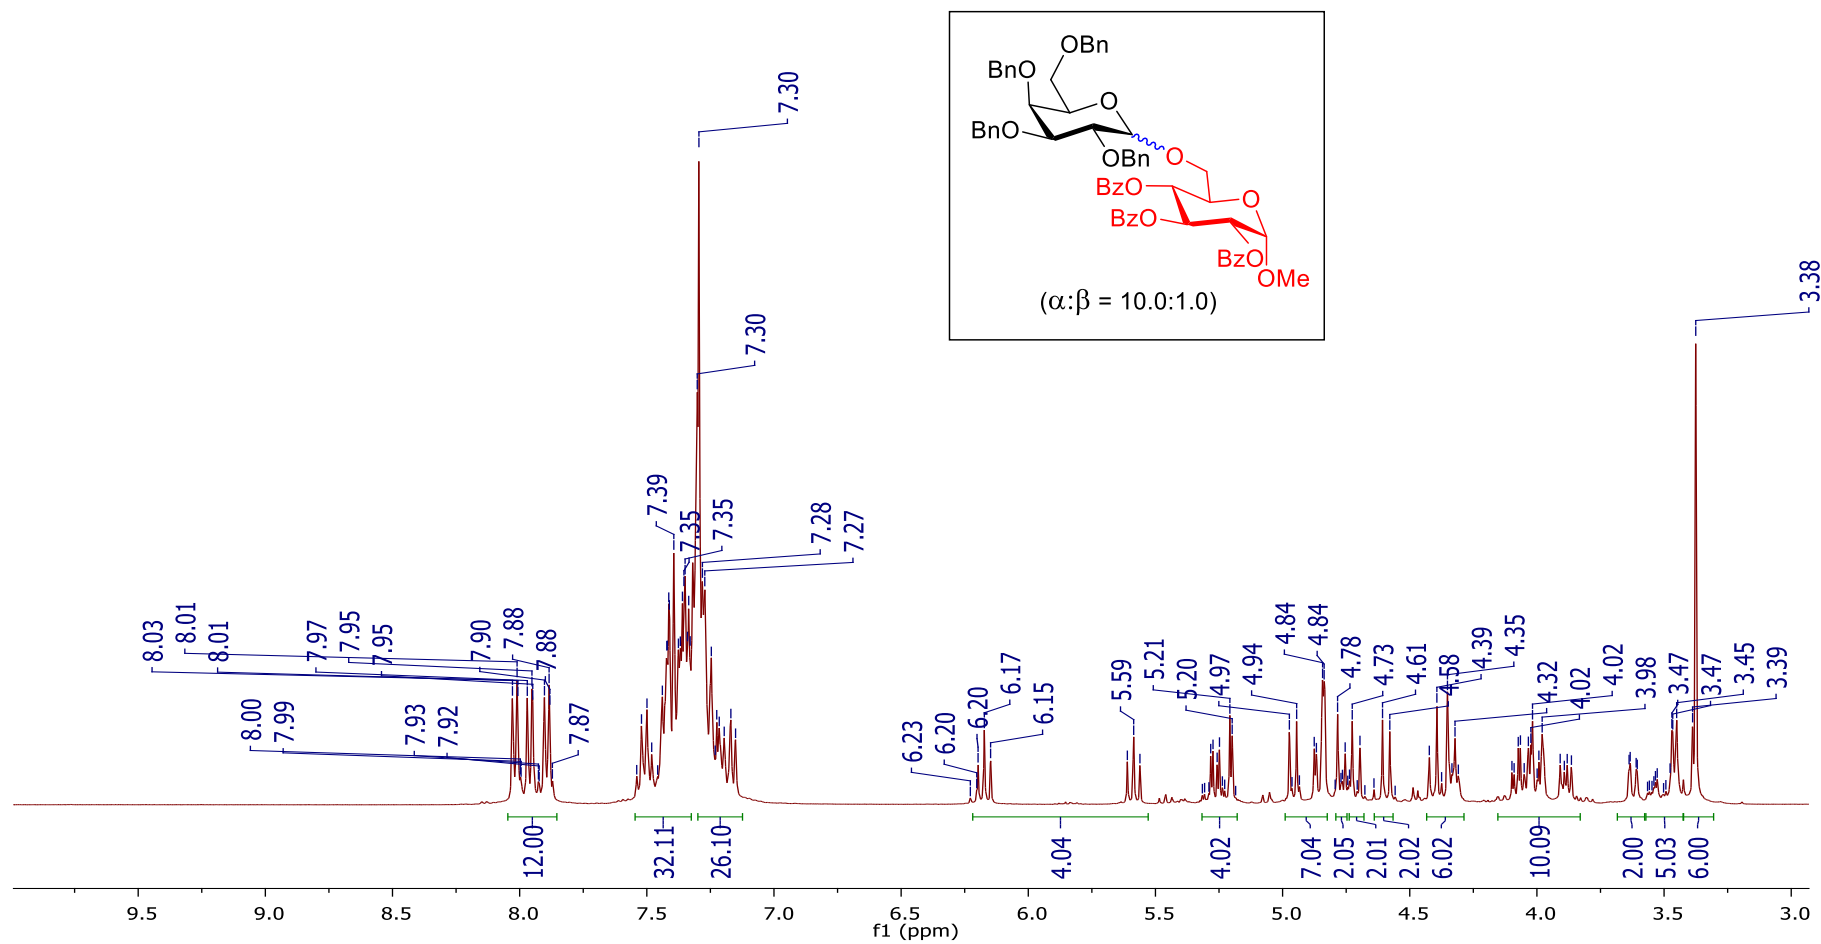

$^{13}\text{C}$  NMR Spectrum (100.67MHz,  $\text{CDCl}_3$ ) of compound **19**

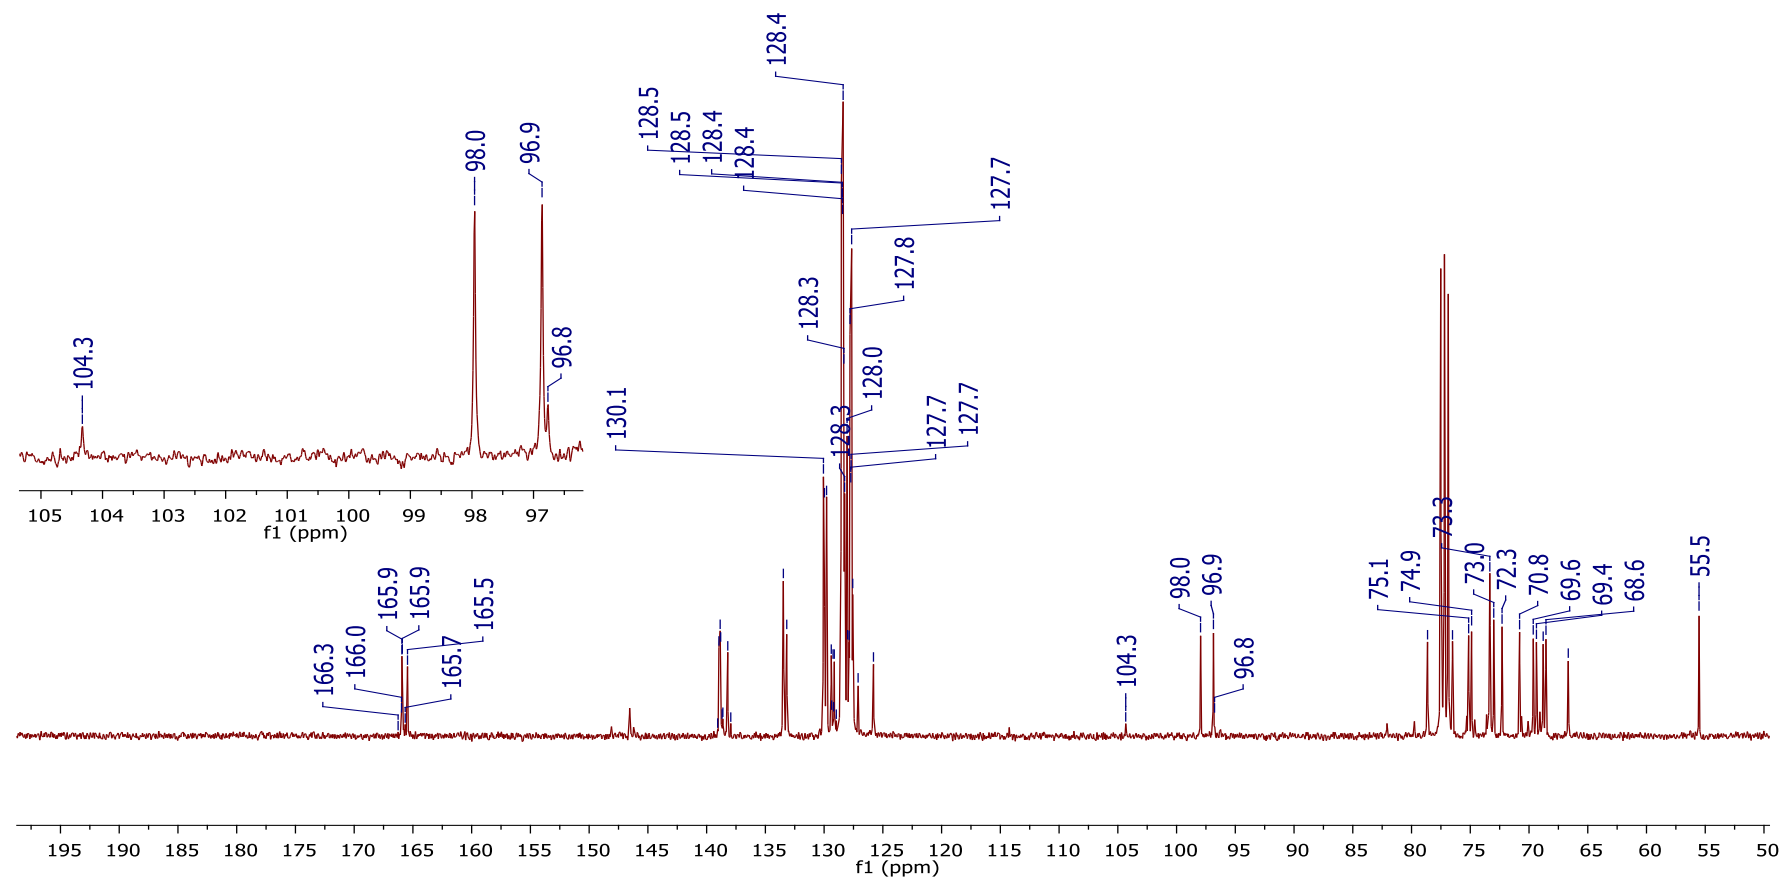

DEPT NMR Spectrum (100.67MHz, CDCl<sub>3</sub>) of compound **19**

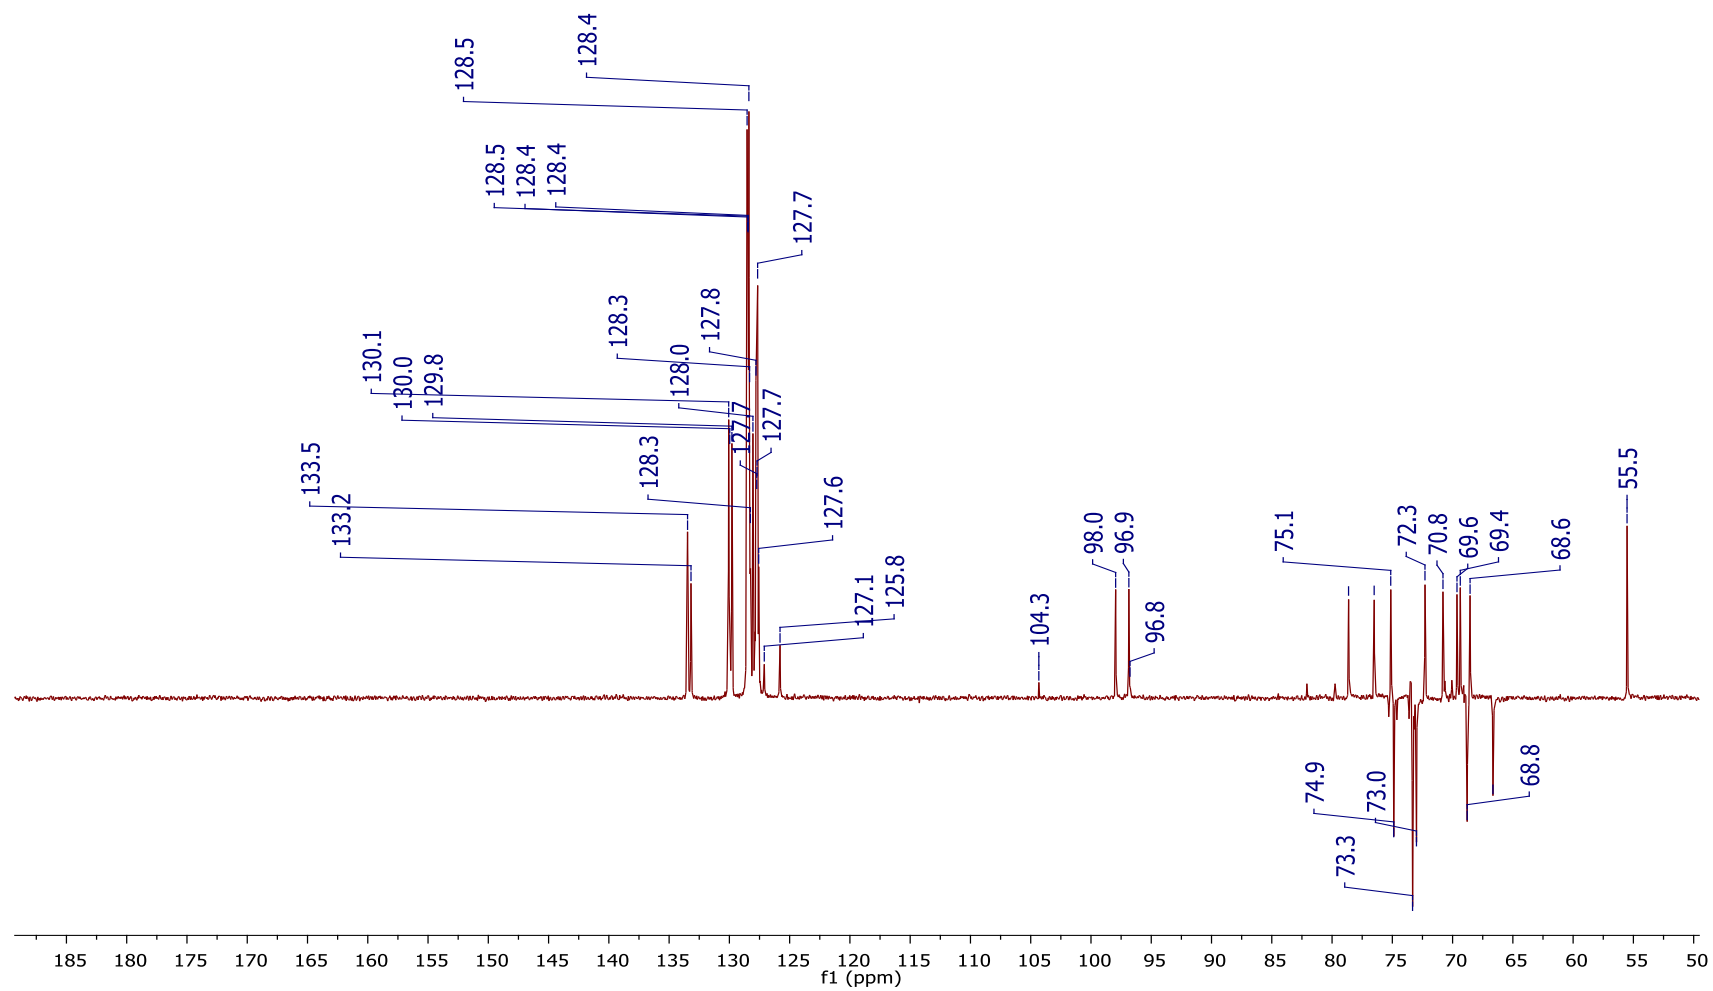

$^1\text{H}$  NMR Spectrum (400.31 MHz,  $\text{CDCl}_3$ ) of compound **20**

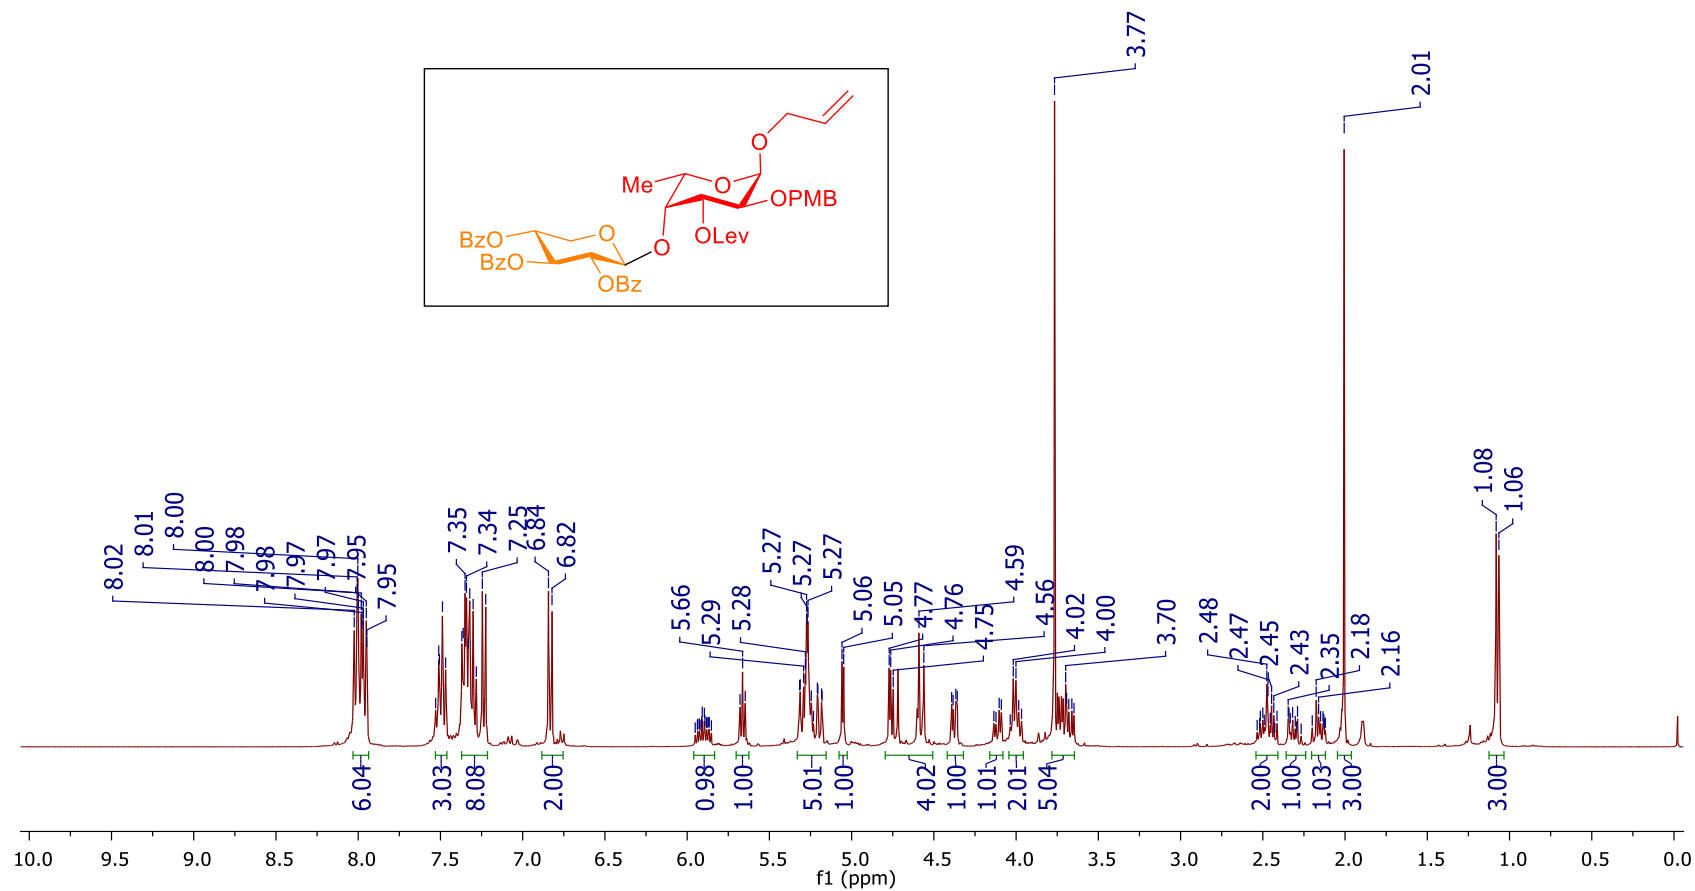

$^{13}\text{C}$  NMR Spectrum (100.67MHz,  $\text{CDCl}_3$ ) of compound **20**

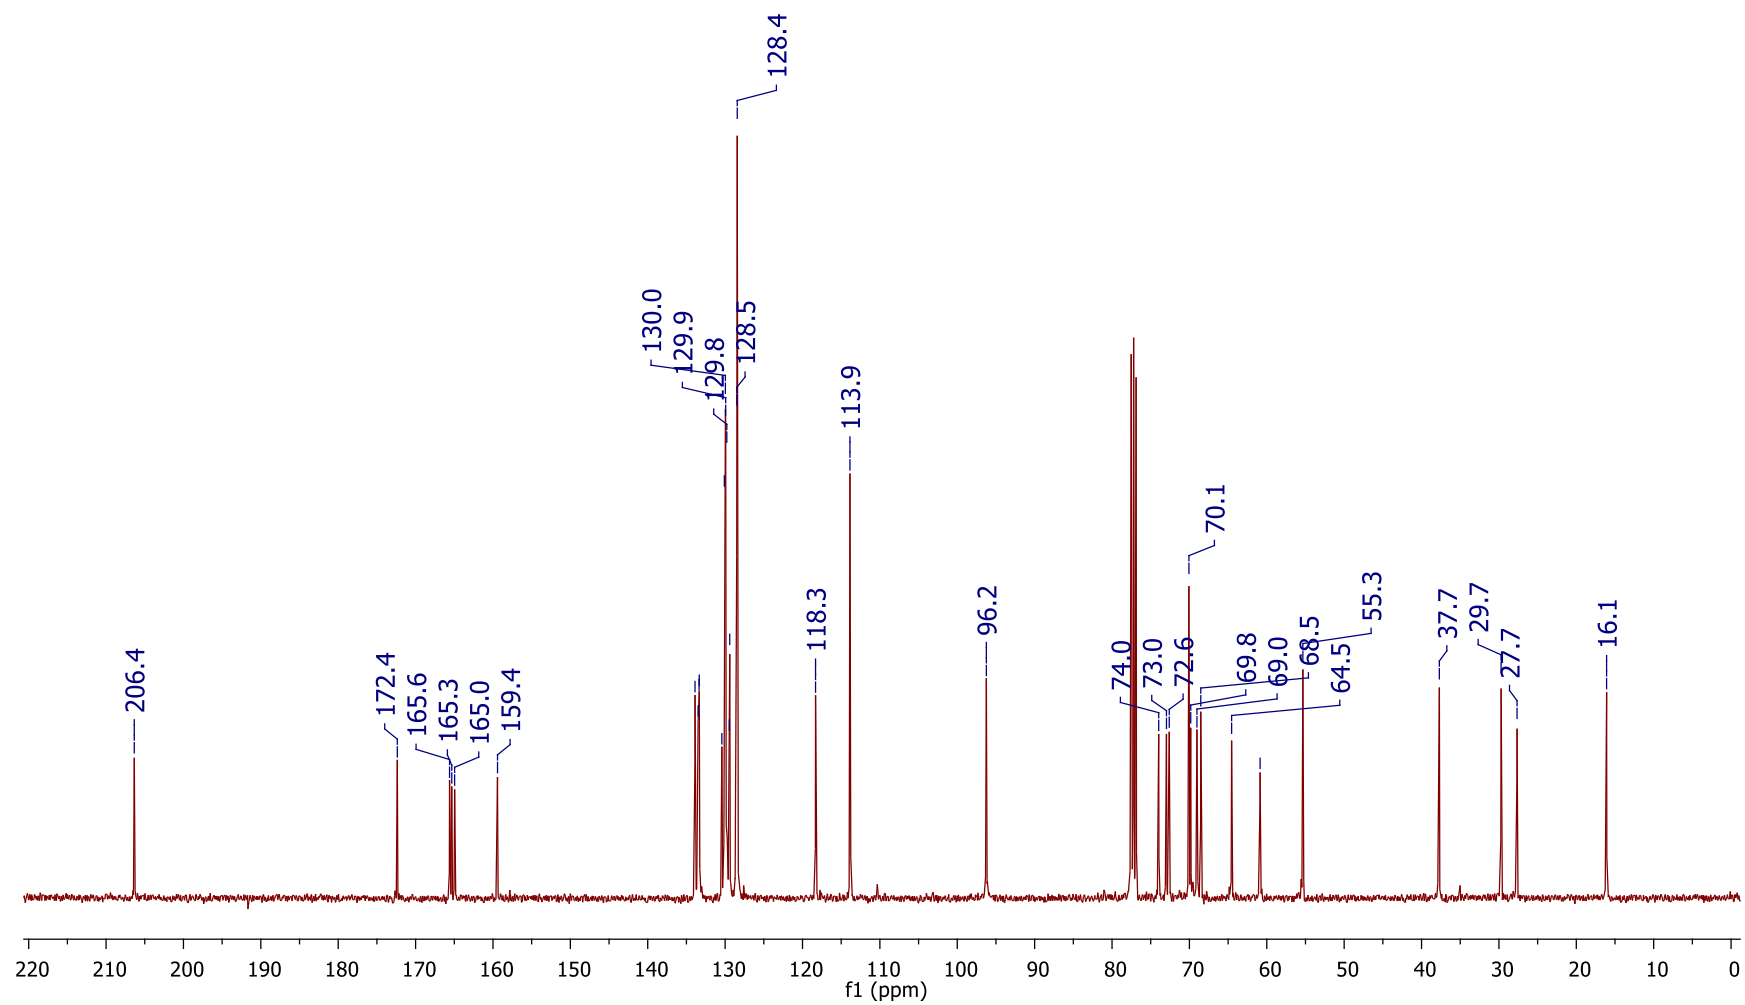

DEPT NMR Spectrum (100.67MHz, CDCl<sub>3</sub>) of compound **20**

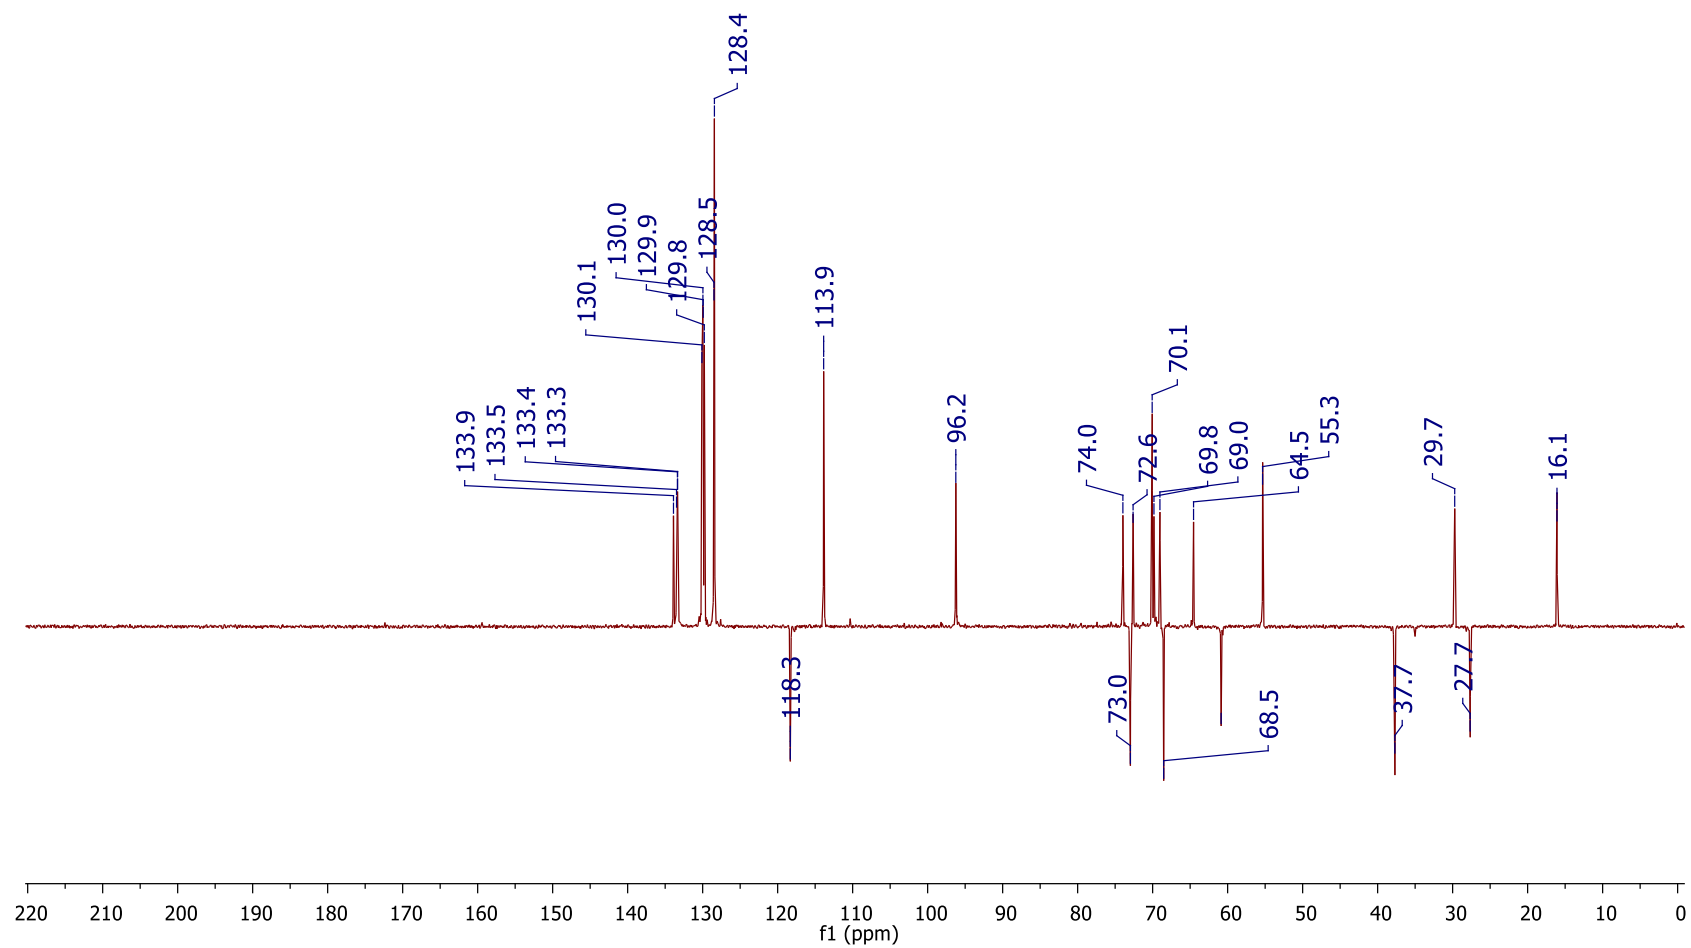



$^1\text{H}$  NMR Spectrum (400.31 MHz,  $\text{CDCl}_3$ ) of compound **21**

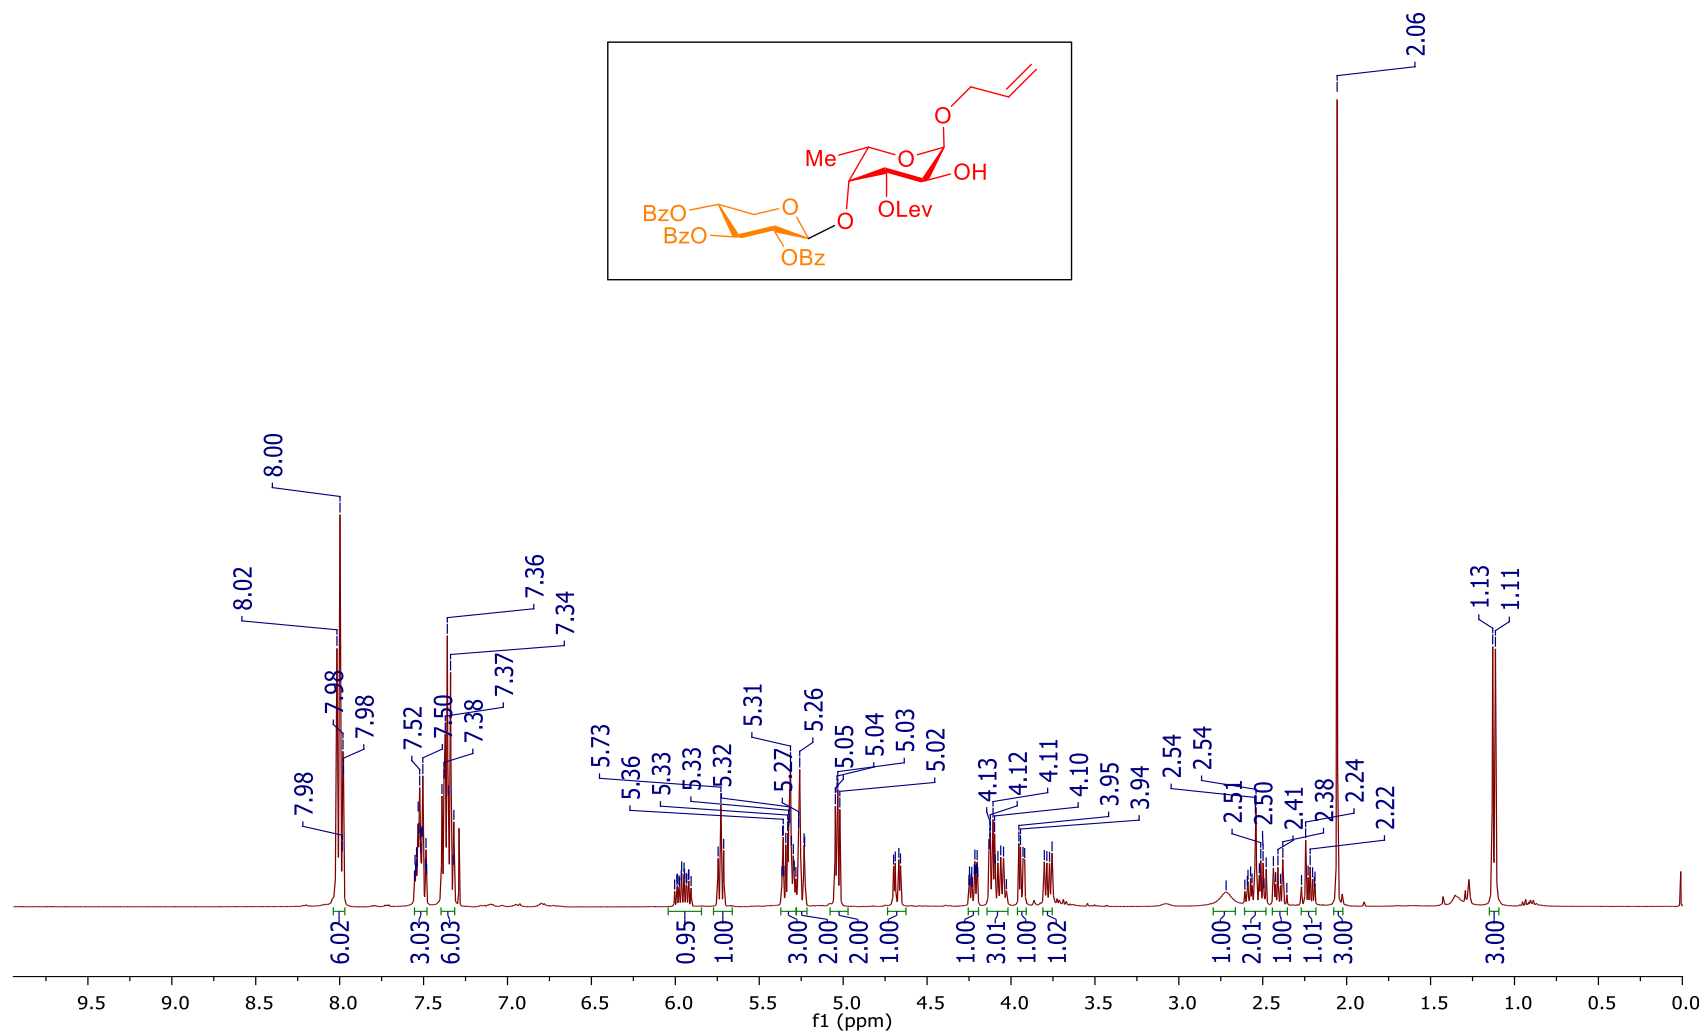

$^{13}\text{C}$  NMR Spectrum (100.67MHz,  $\text{CDCl}_3$ ) of compound **21**

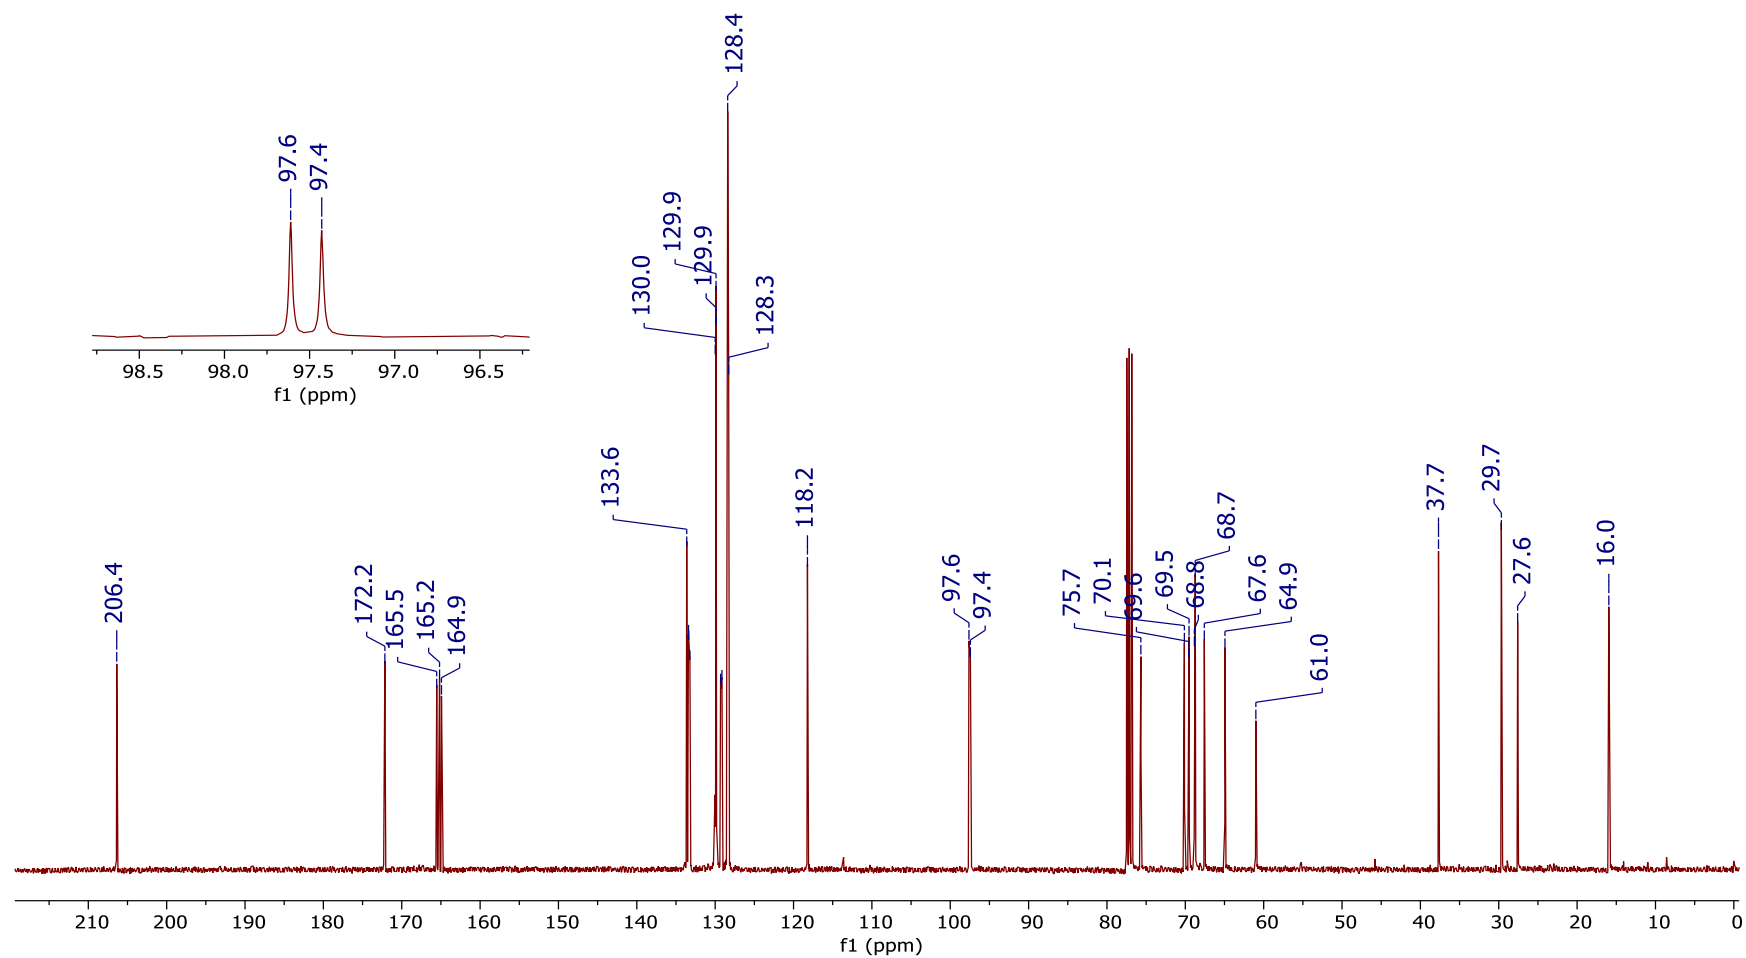

DEPT NMR Spectrum (100.67MHz, CDCl<sub>3</sub>) of compound **21**

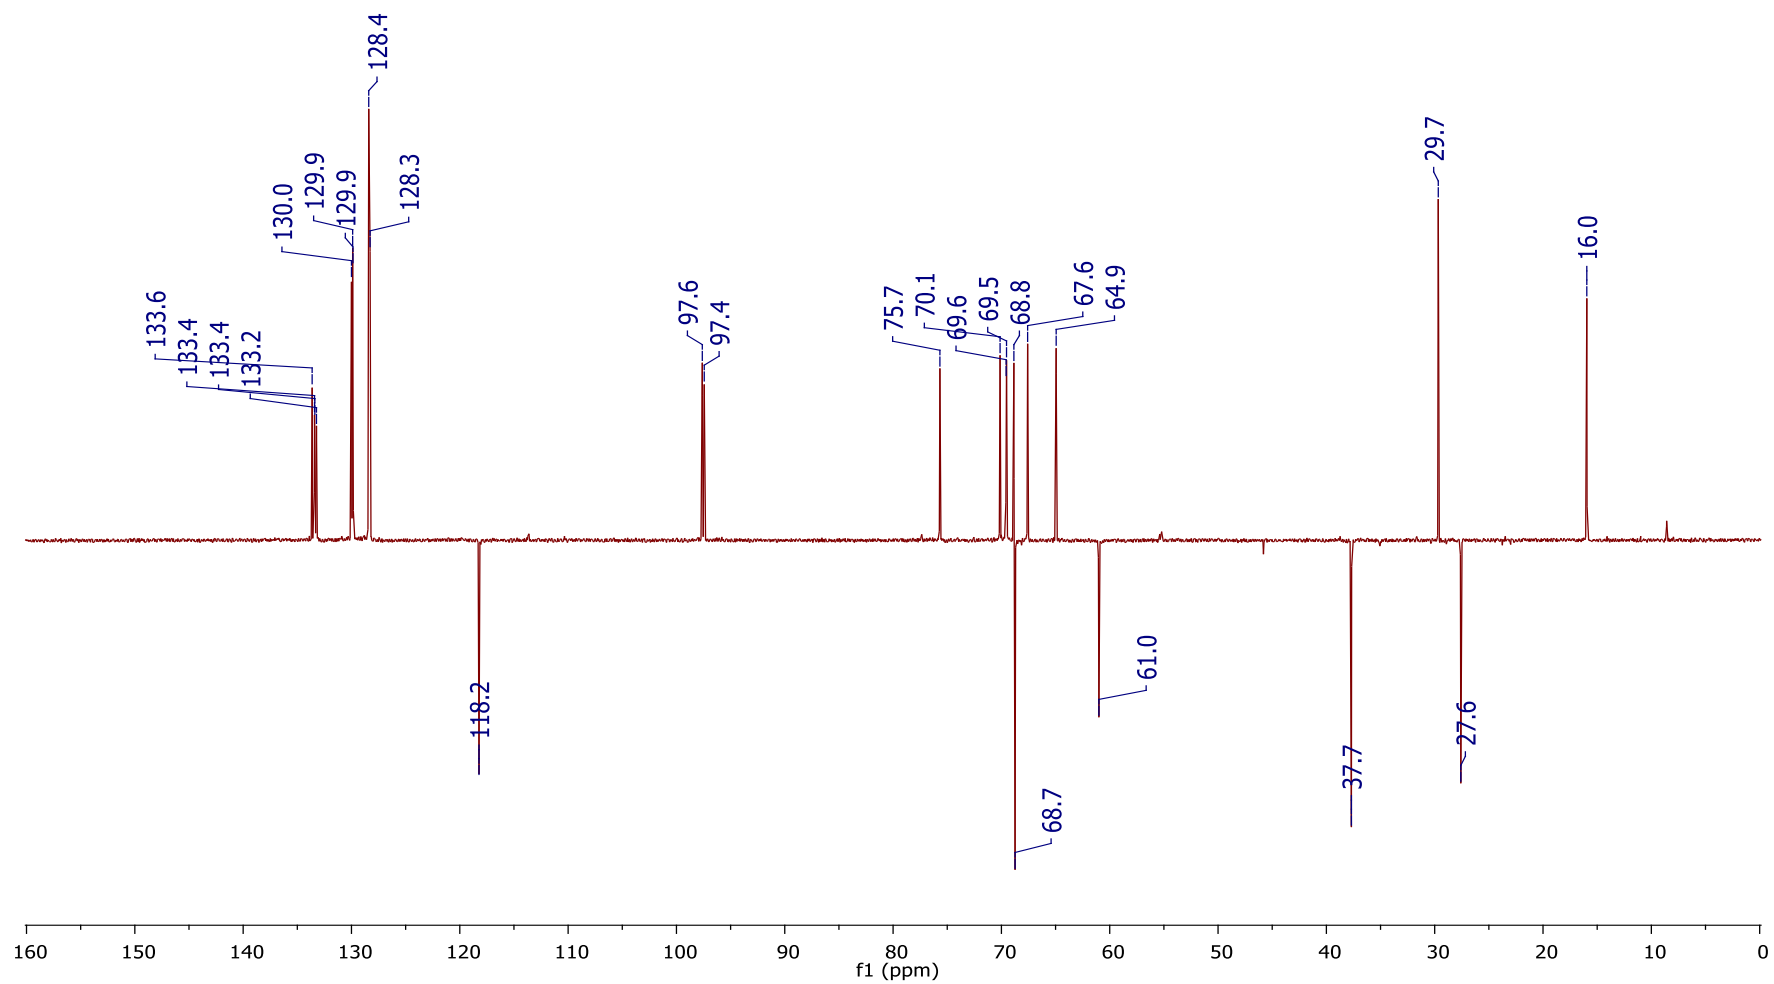

<sup>1</sup>H NMR Spectrum (400.31 MHz, CDCl<sub>3</sub>) of compound **22**

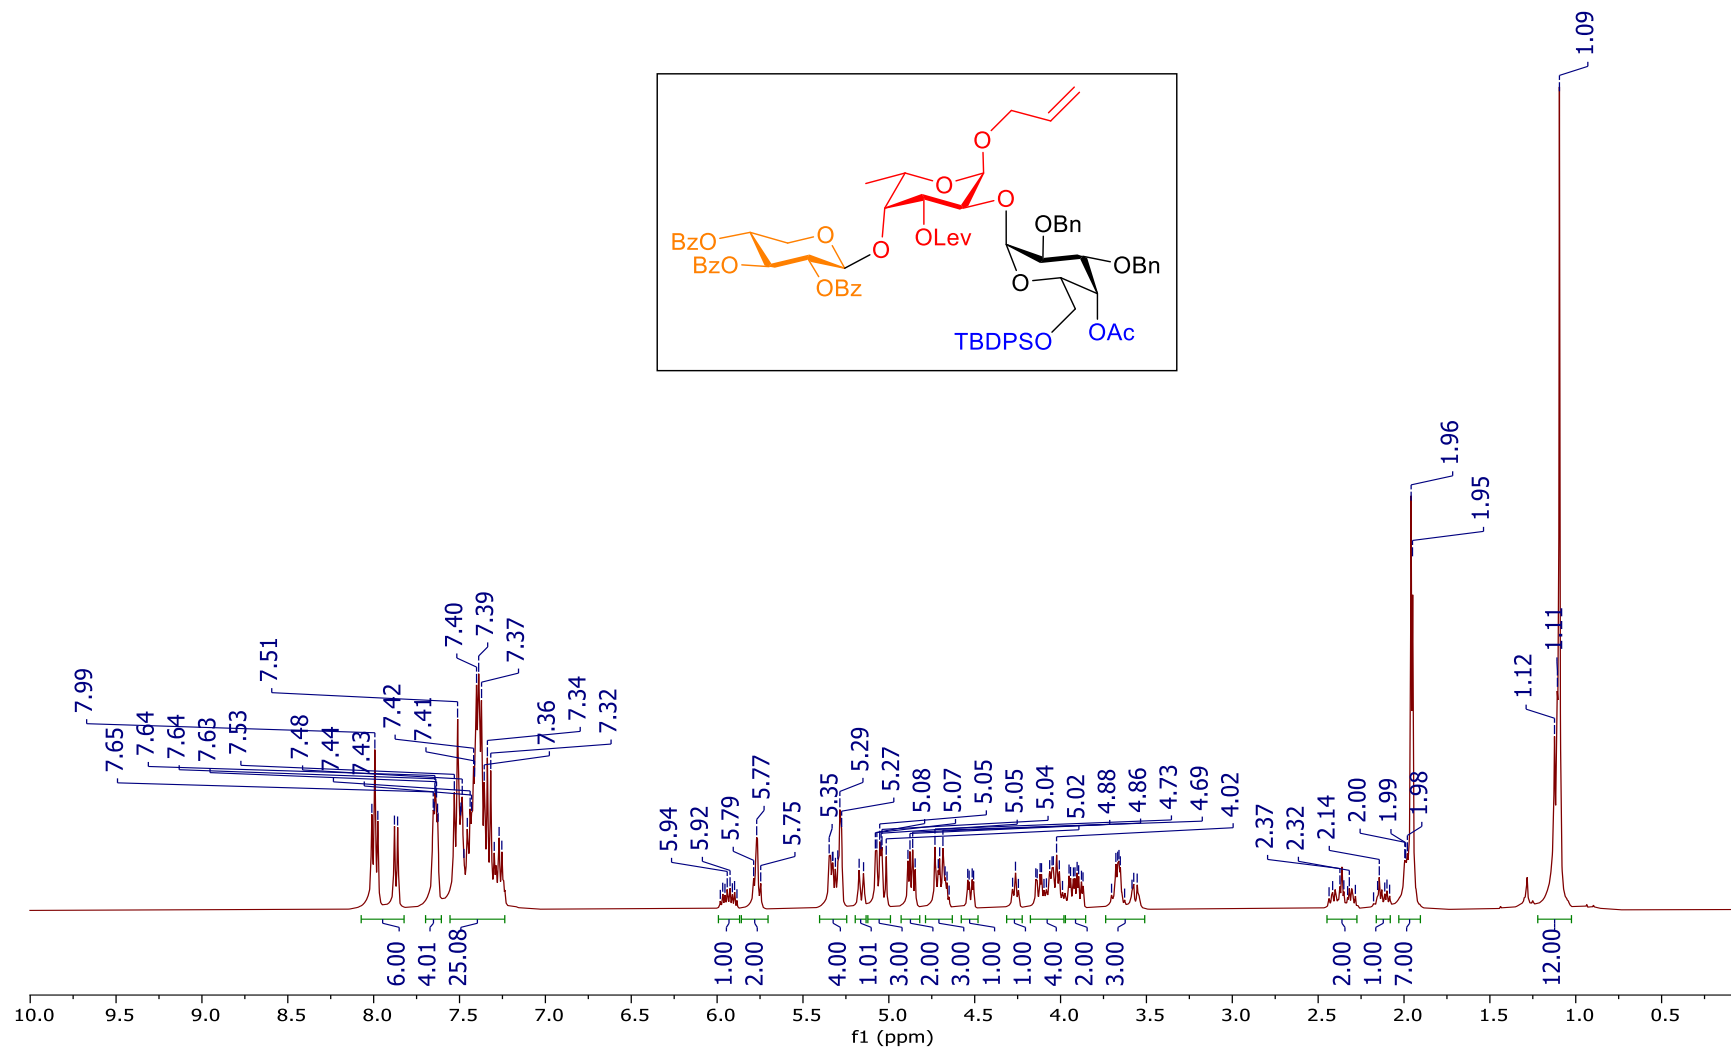

$^{13}\text{C}$  NMR Spectrum (100.67MHz,  $\text{CDCl}_3$ ) of compound **22**

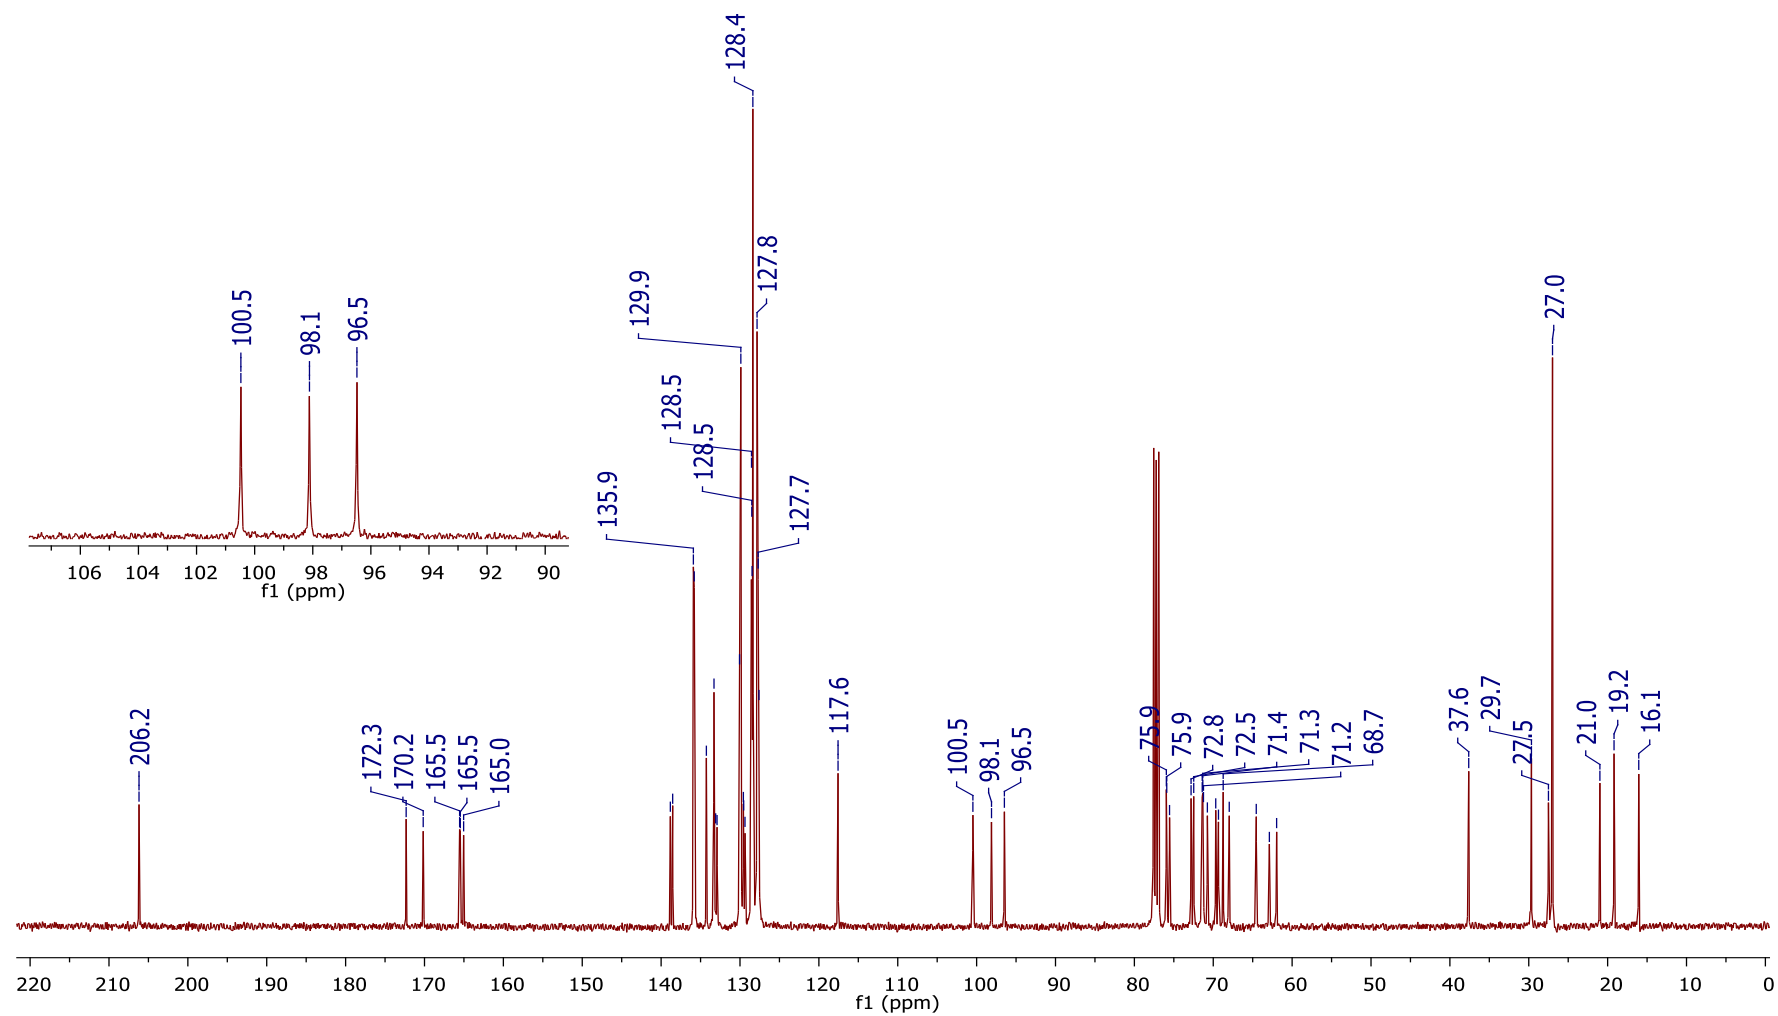

DEPT NMR Spectrum (100.67MHz, CDCl<sub>3</sub>) of compound **22**

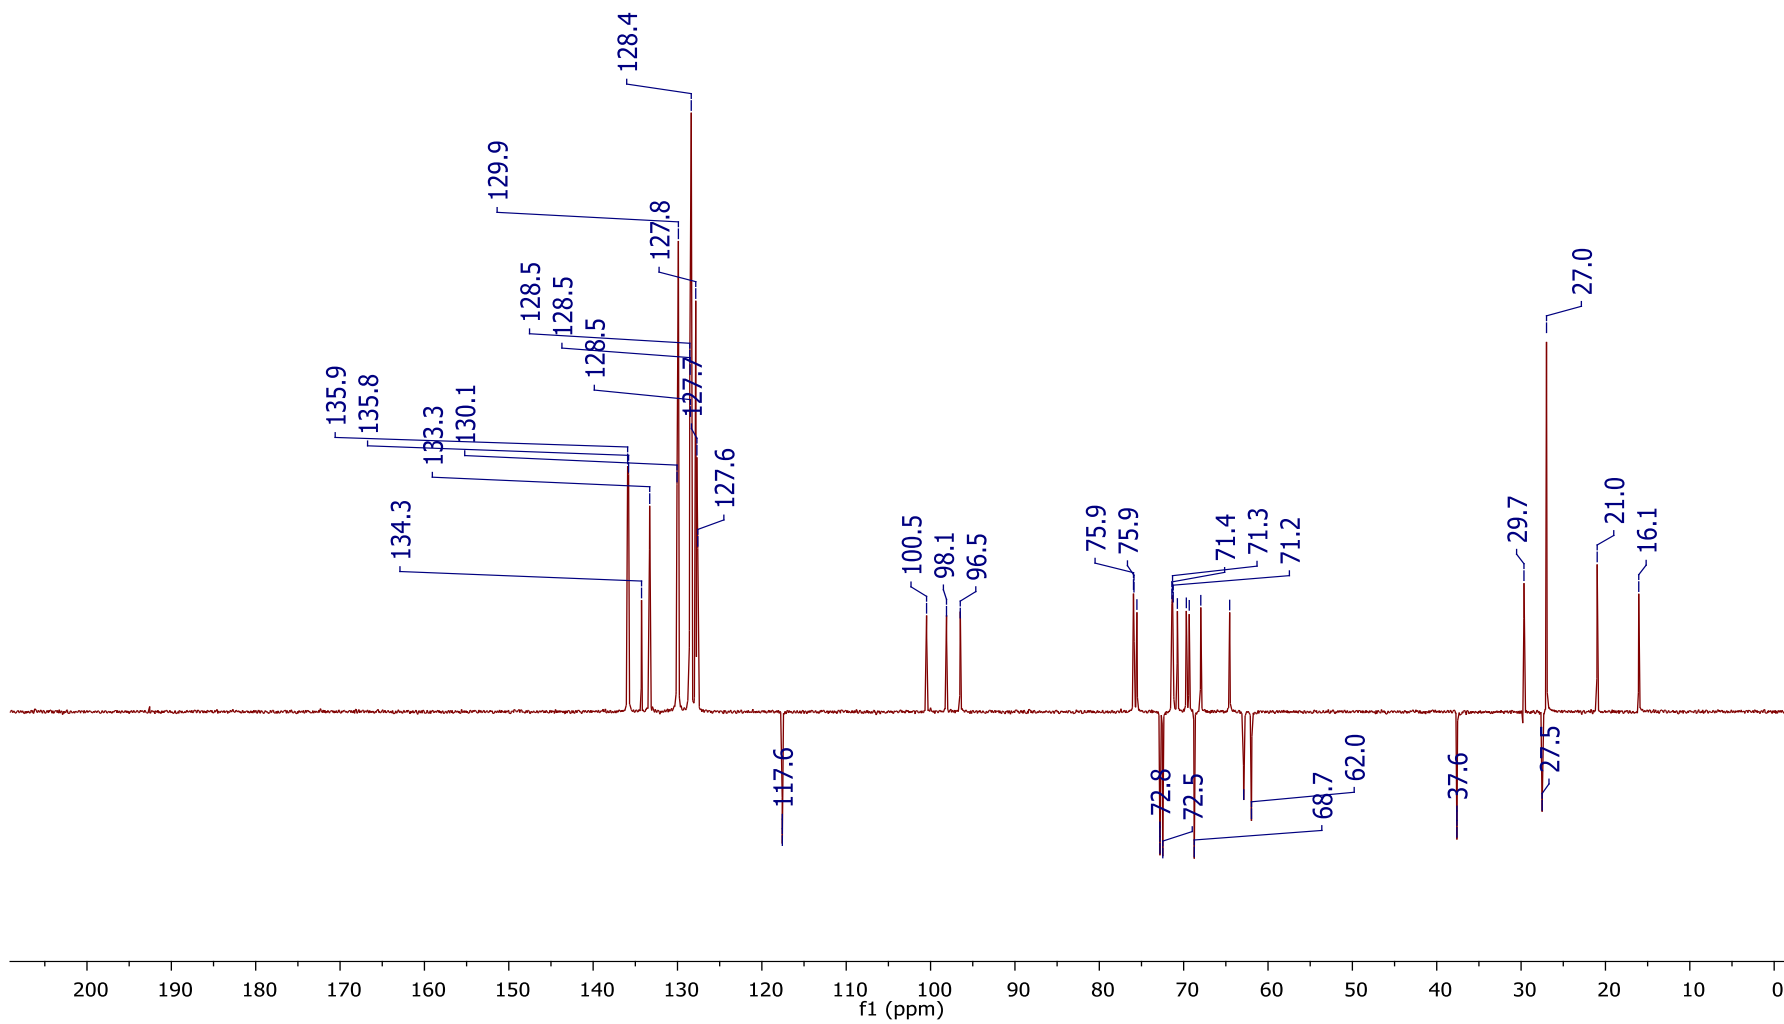

$^1\text{H}$  NMR Spectrum (400.31 MHz,  $\text{CDCl}_3$ ) of compound **23**

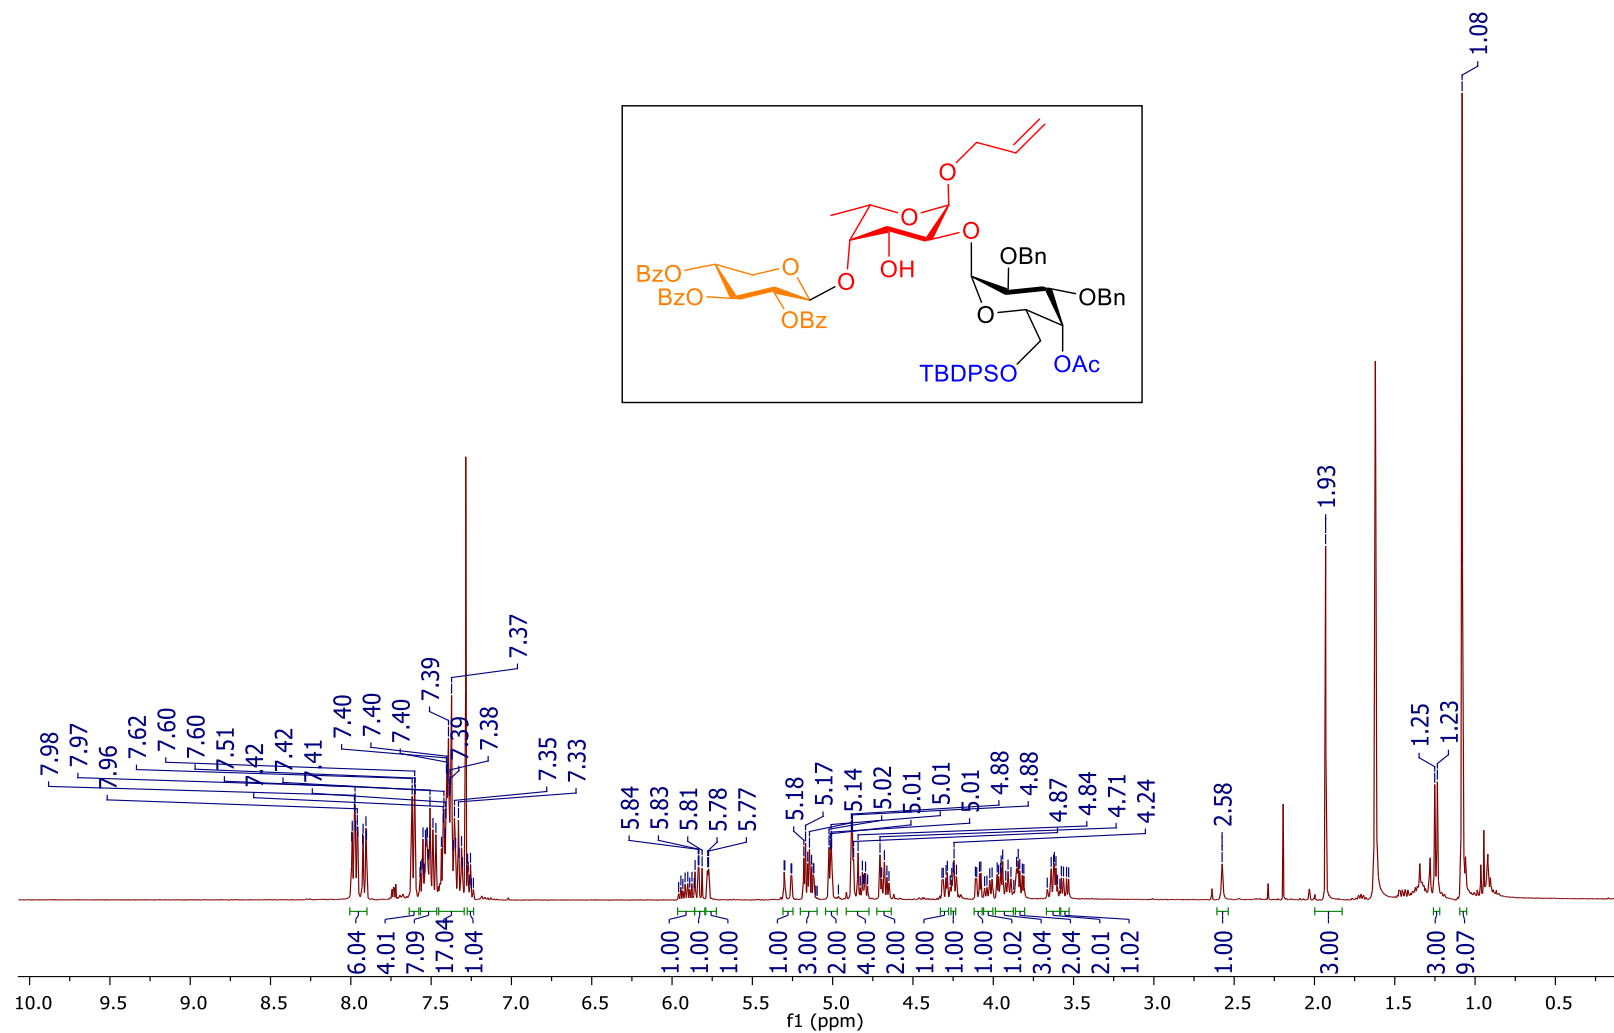

$^{13}\text{C}$  NMR Spectrum (100.67MHz,  $\text{CDCl}_3$ ) of compound **23**

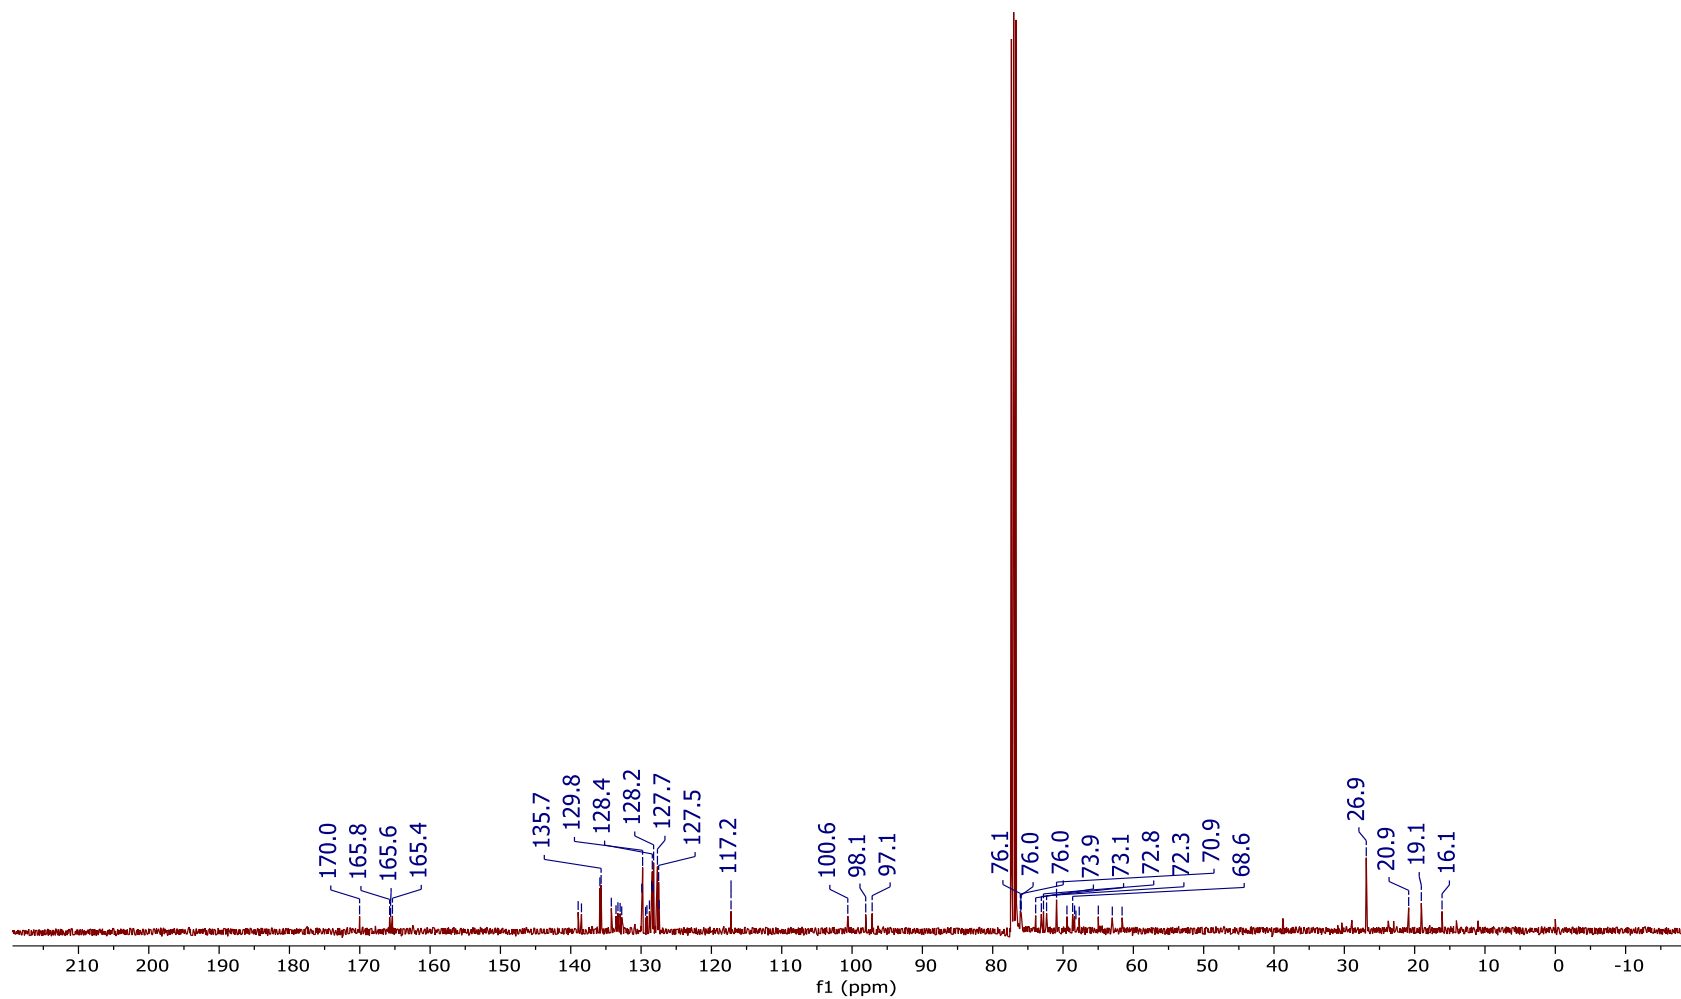



DEPT NMR Spectrum (100.67MHz, CDCl<sub>3</sub>) of compound **23**

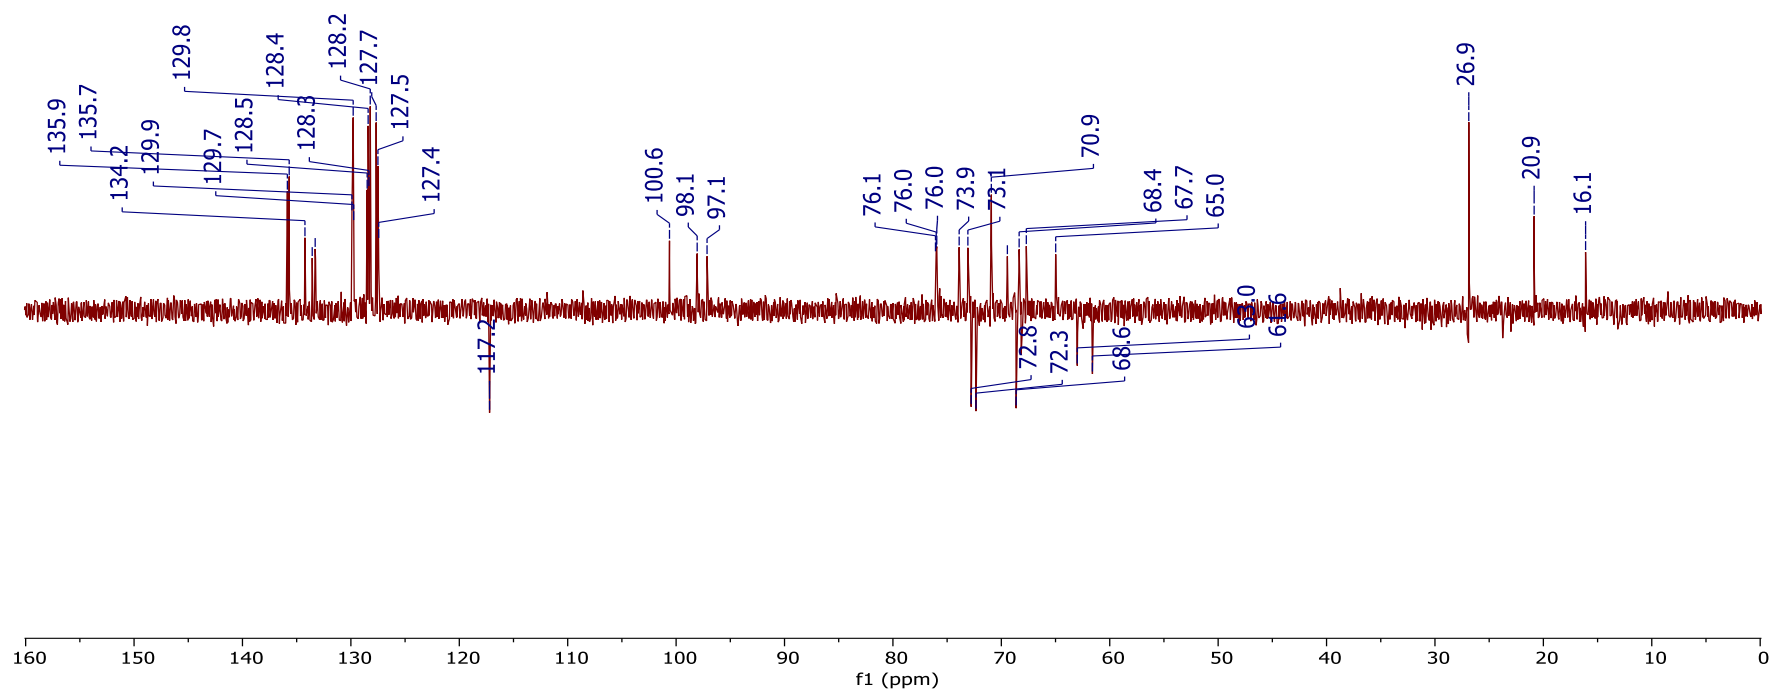

$^1\text{H}$  NMR Spectrum (400.31 MHz,  $\text{CDCl}_3$ ) of compound **2**

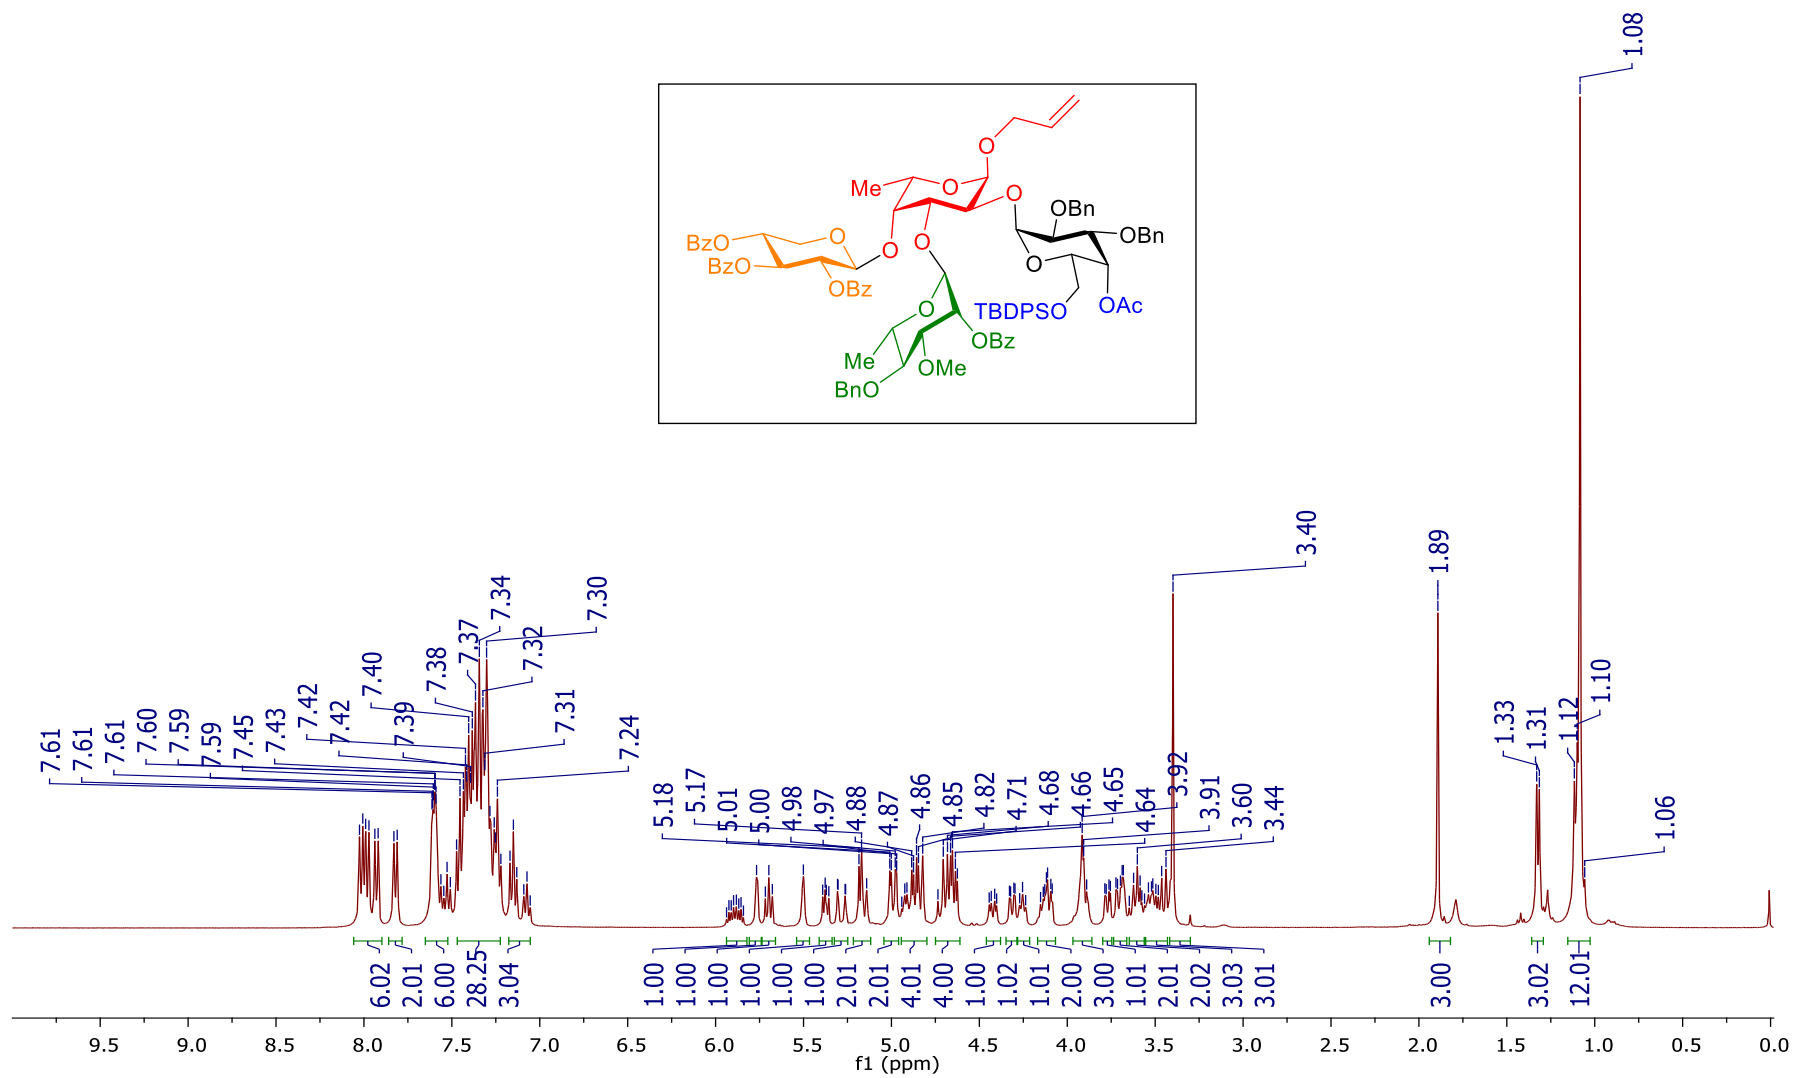

$^{13}\text{C}$  NMR Spectrum (100.67MHz,  $\text{CDCl}_3$ ) of compound **2**

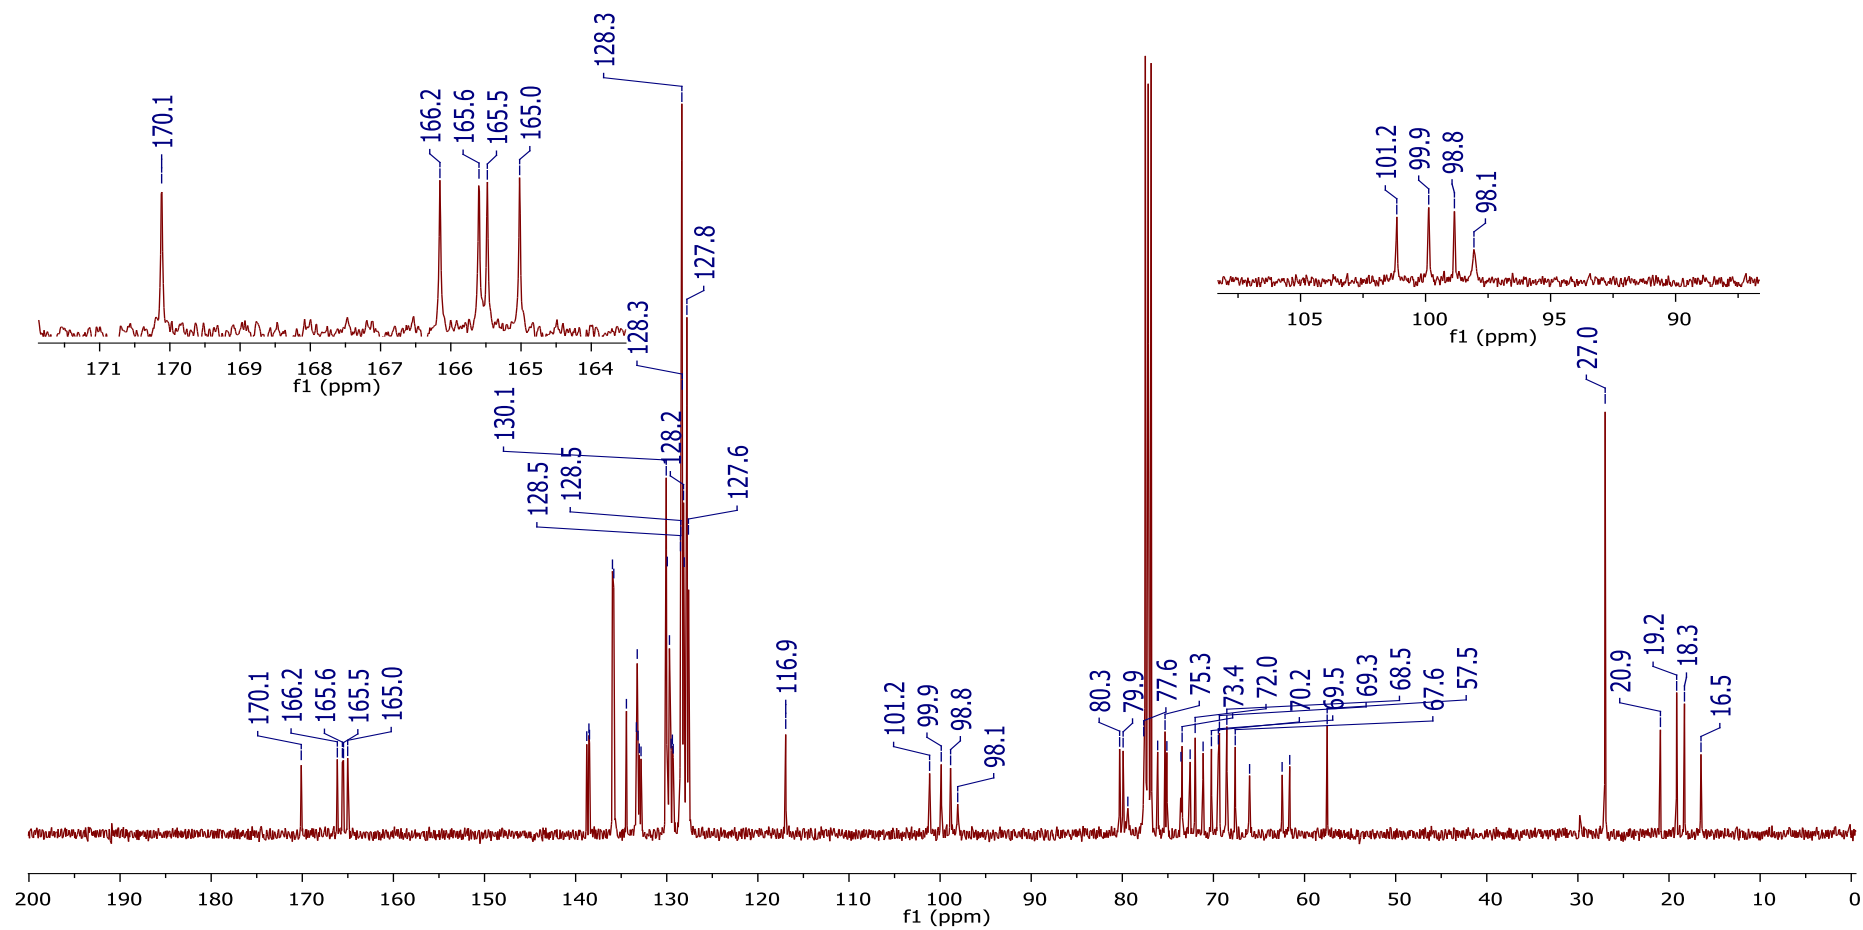

DEPT NMR Spectrum (100.67MHz, CDCl<sub>3</sub>) of compound **2**

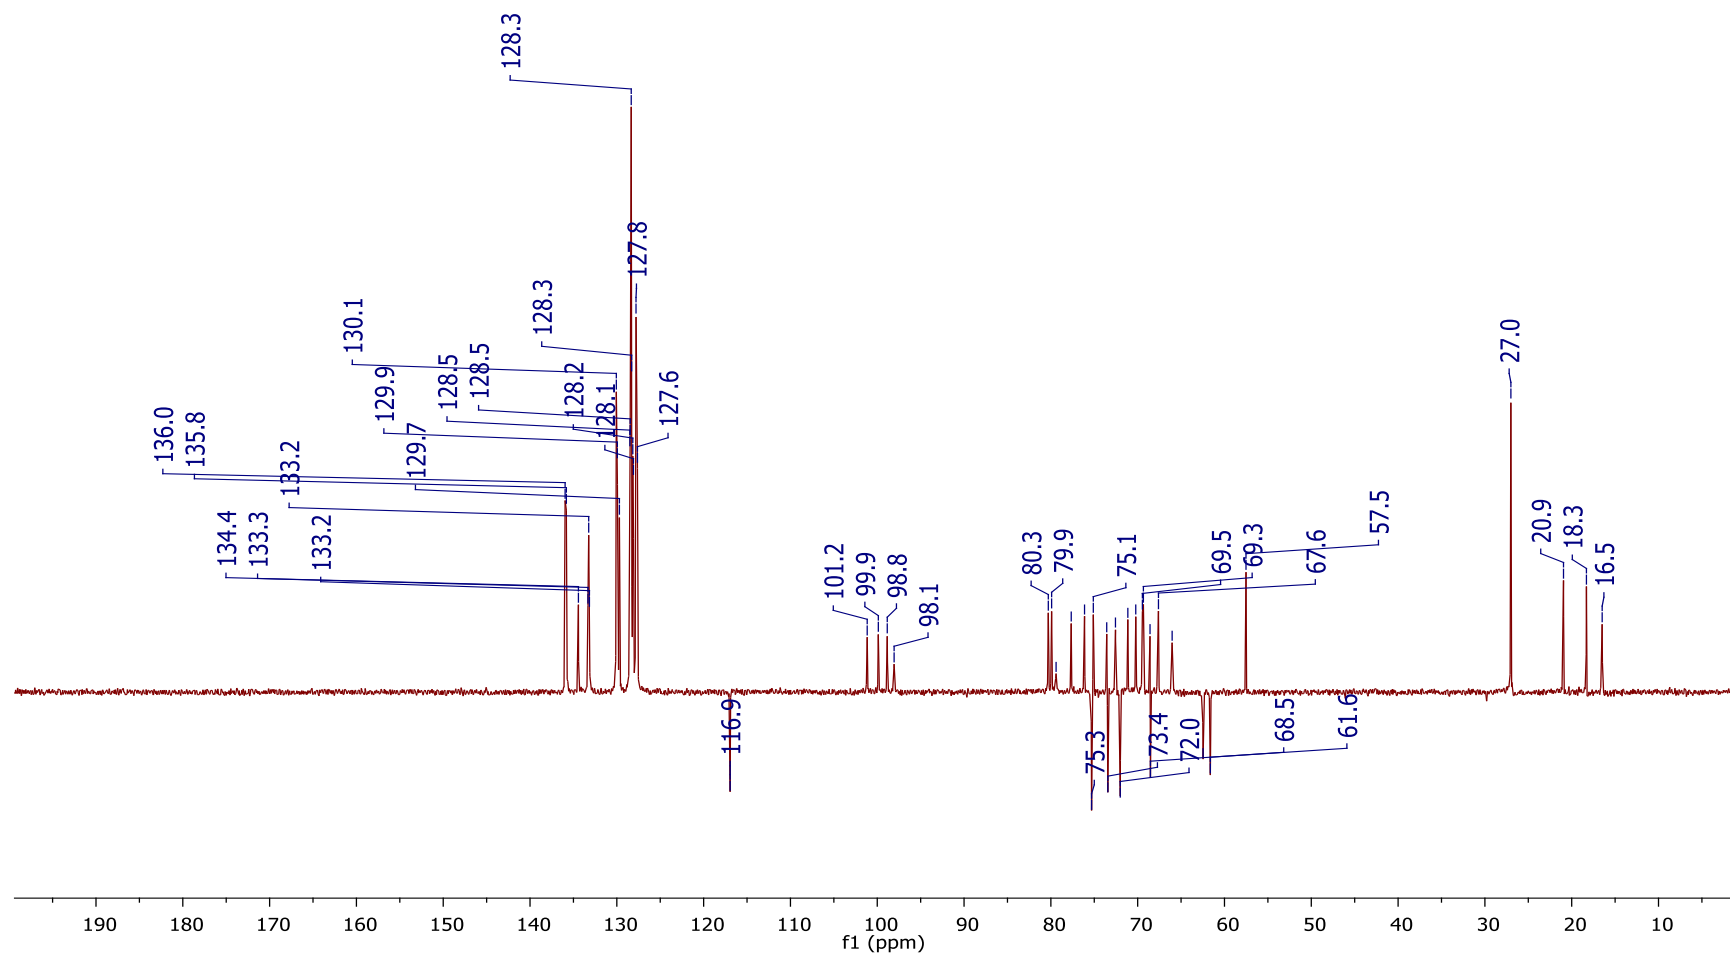

$^1\text{H}$  NMR Spectrum (400.31 MHz,  $\text{CDCl}_3$ ) of compound **24**

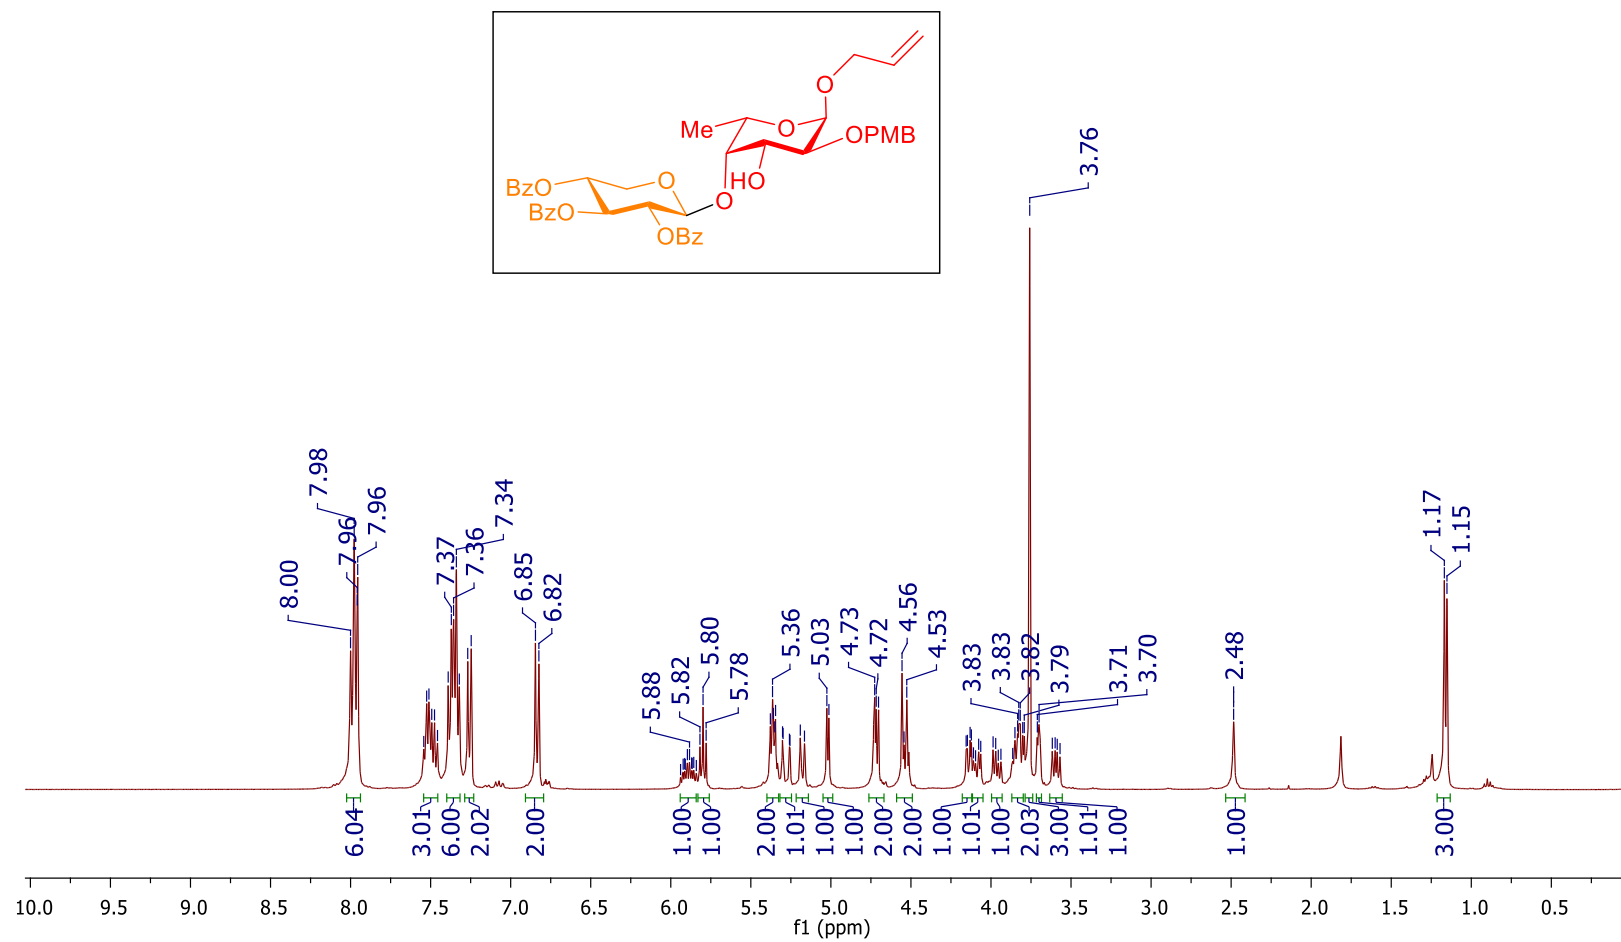

$^{13}\text{C}$  NMR Spectrum (100.67MHz,  $\text{CDCl}_3$ ) of compound **24**

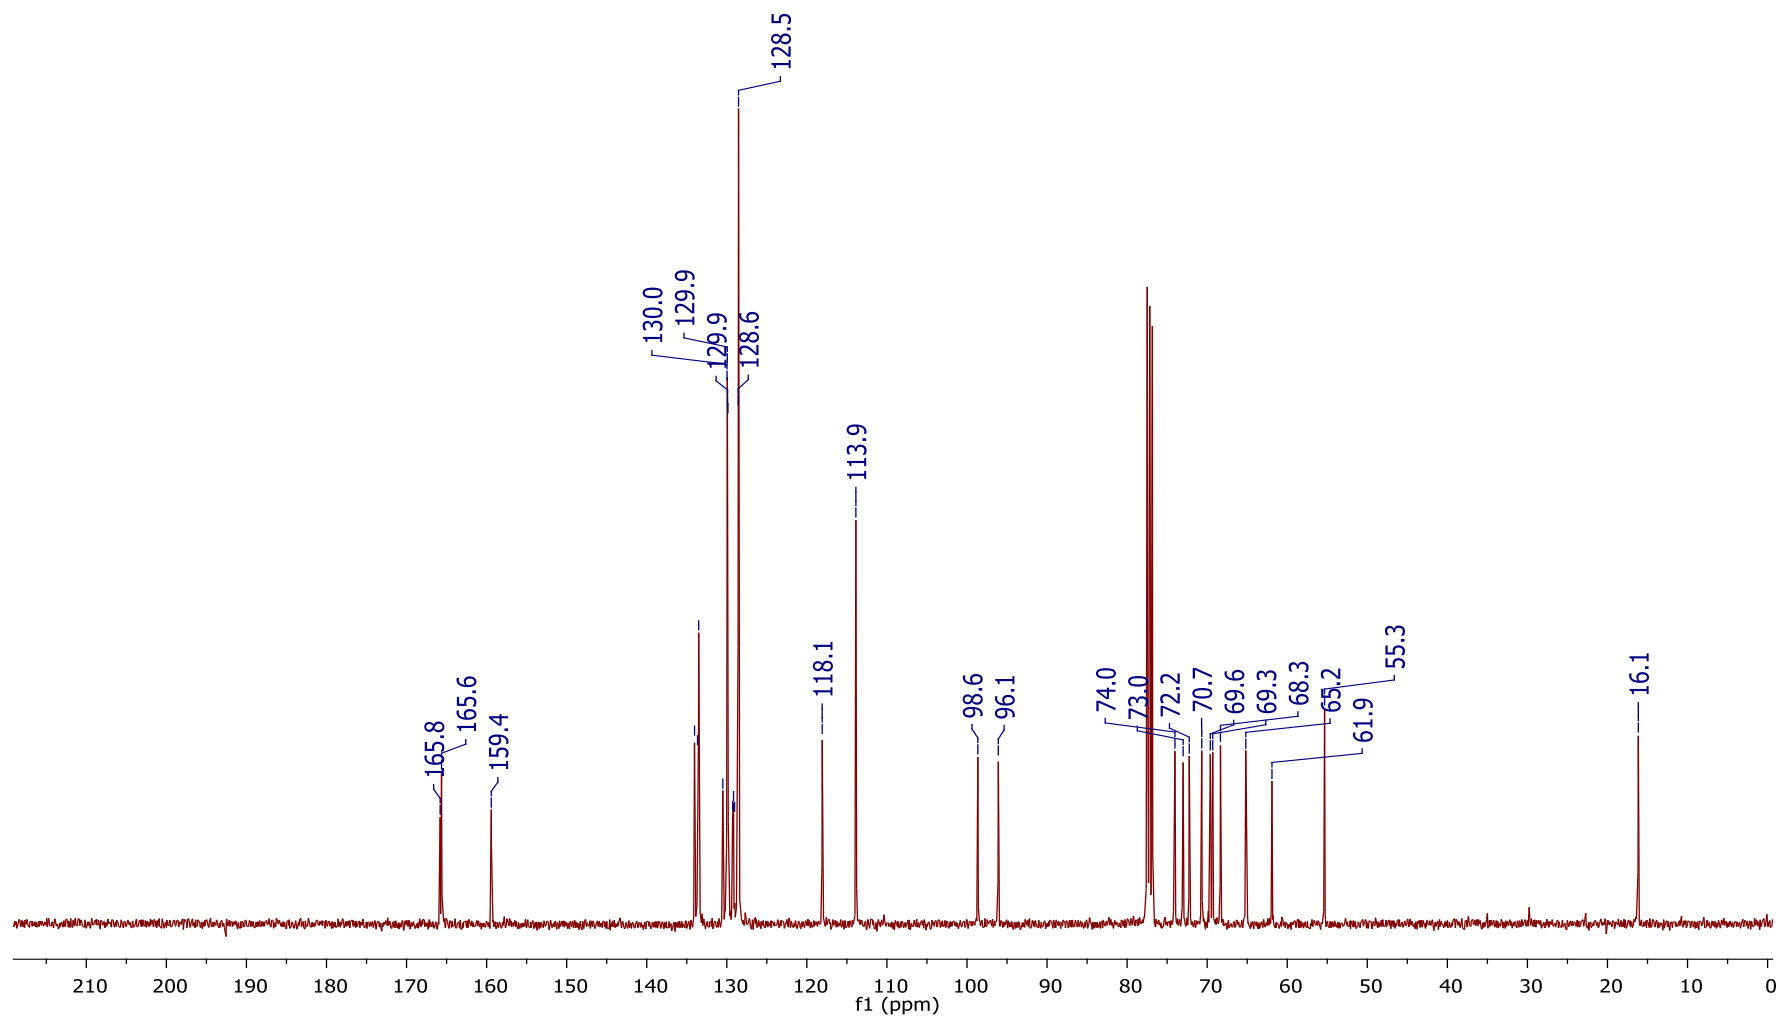

DEPT NMR Spectrum (100.67MHz, CDCl<sub>3</sub>) of compound **24**

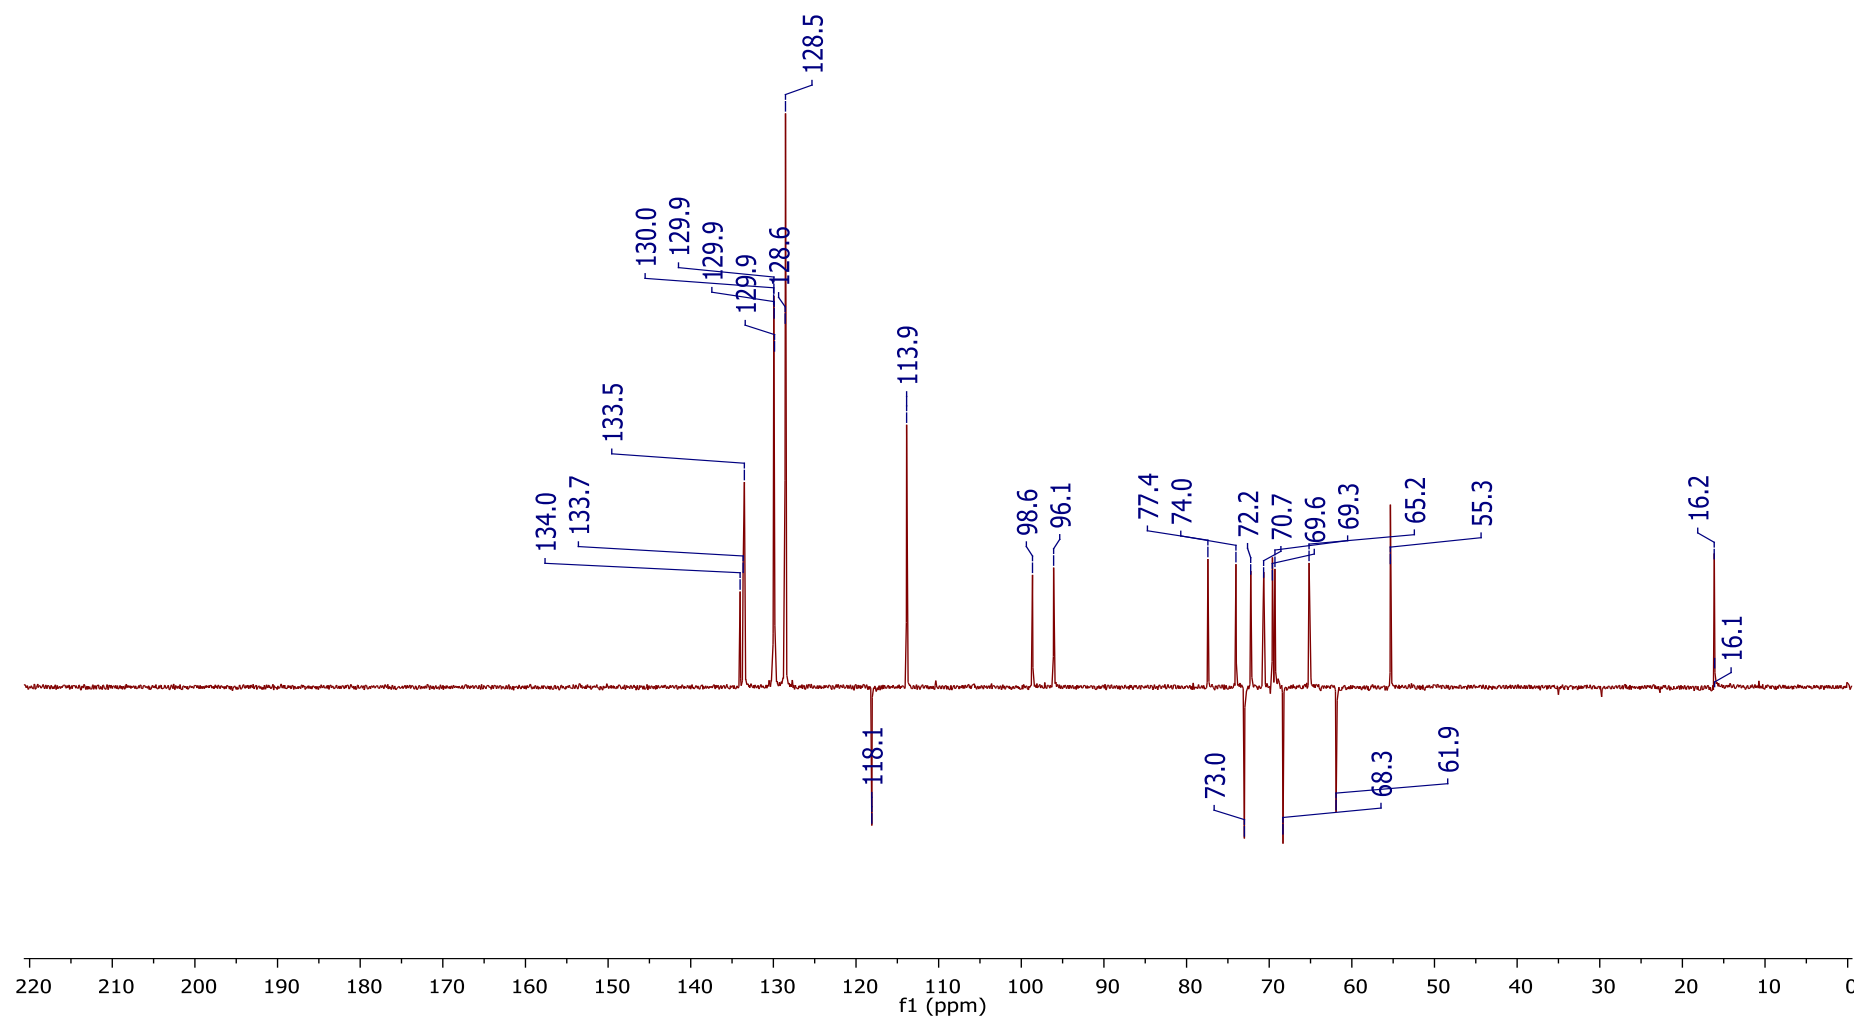

$^1\text{H}$  NMR Spectrum (400.31 MHz,  $\text{CDCl}_3$ ) of compound **25**

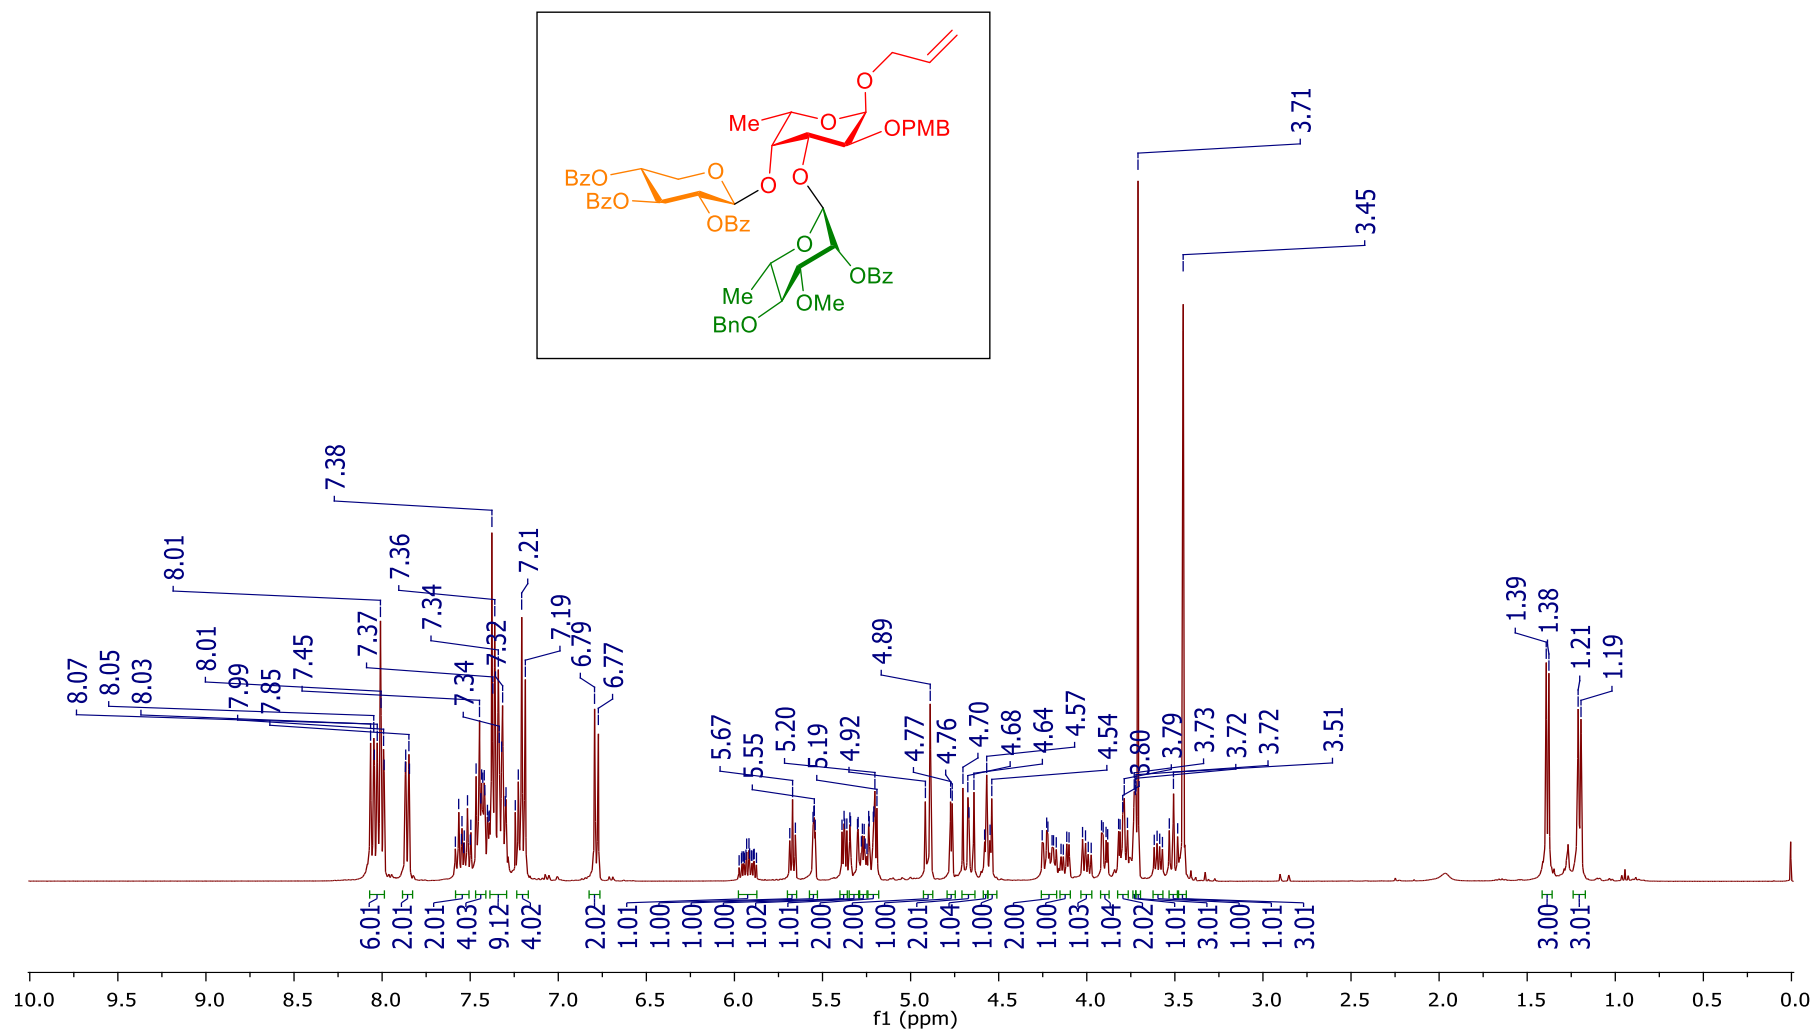



$^{13}\text{C}$  NMR Spectrum (100.67MHz,  $\text{CDCl}_3$ ) of compound **25**

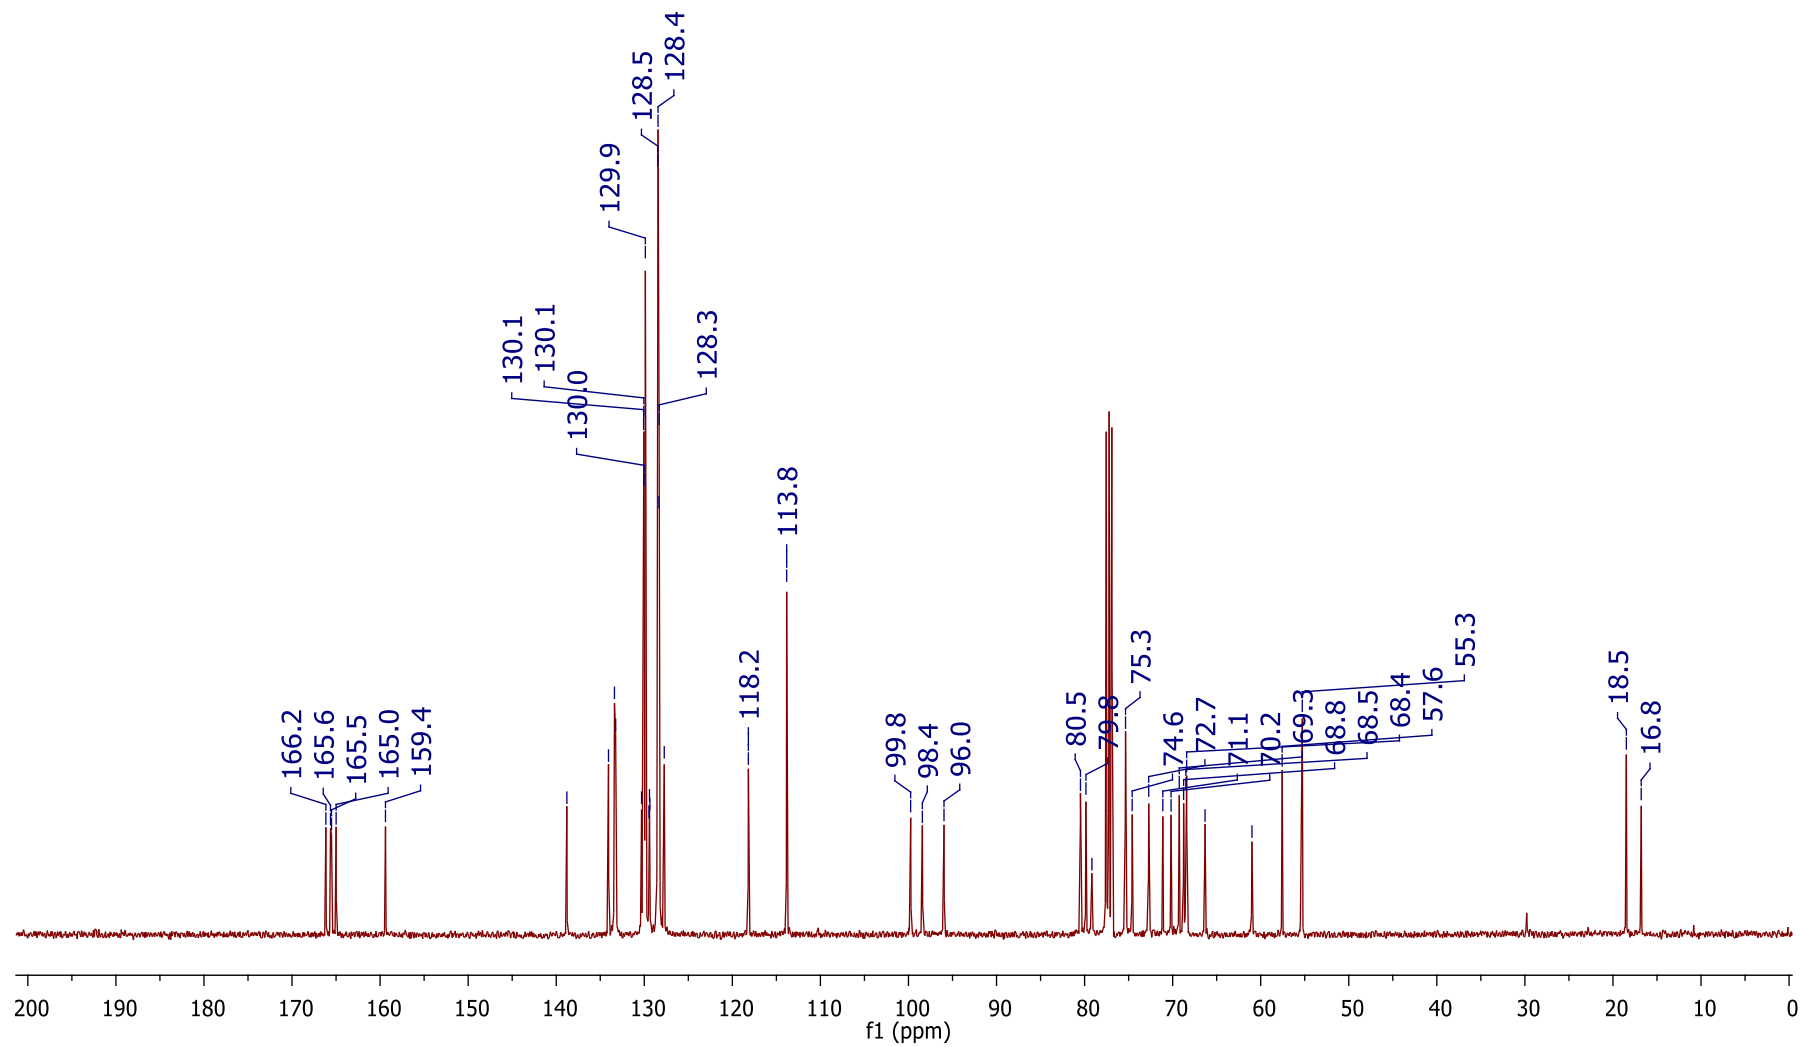

DEPT NMR Spectrum (100.67MHz, CDCl<sub>3</sub>) of compound **25**

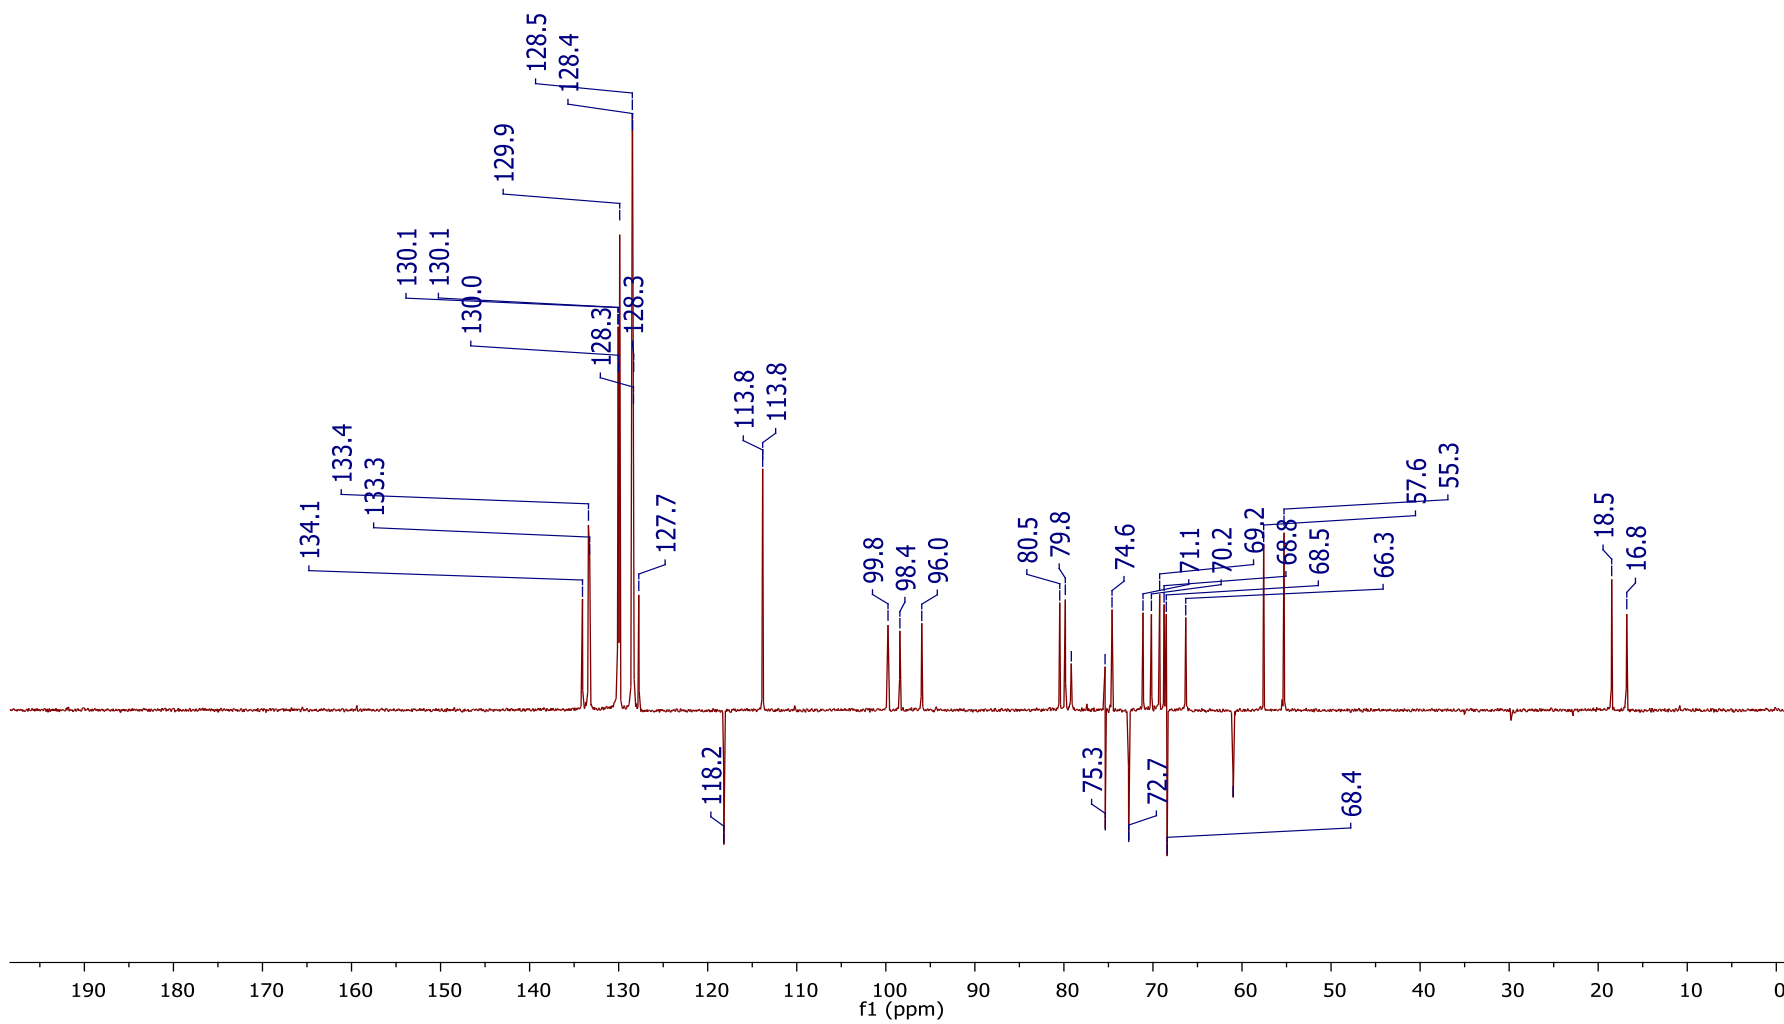

$^1\text{H}$  NMR Spectrum (400.31 MHz,  $\text{CDCl}_3$ ) of compound **26**

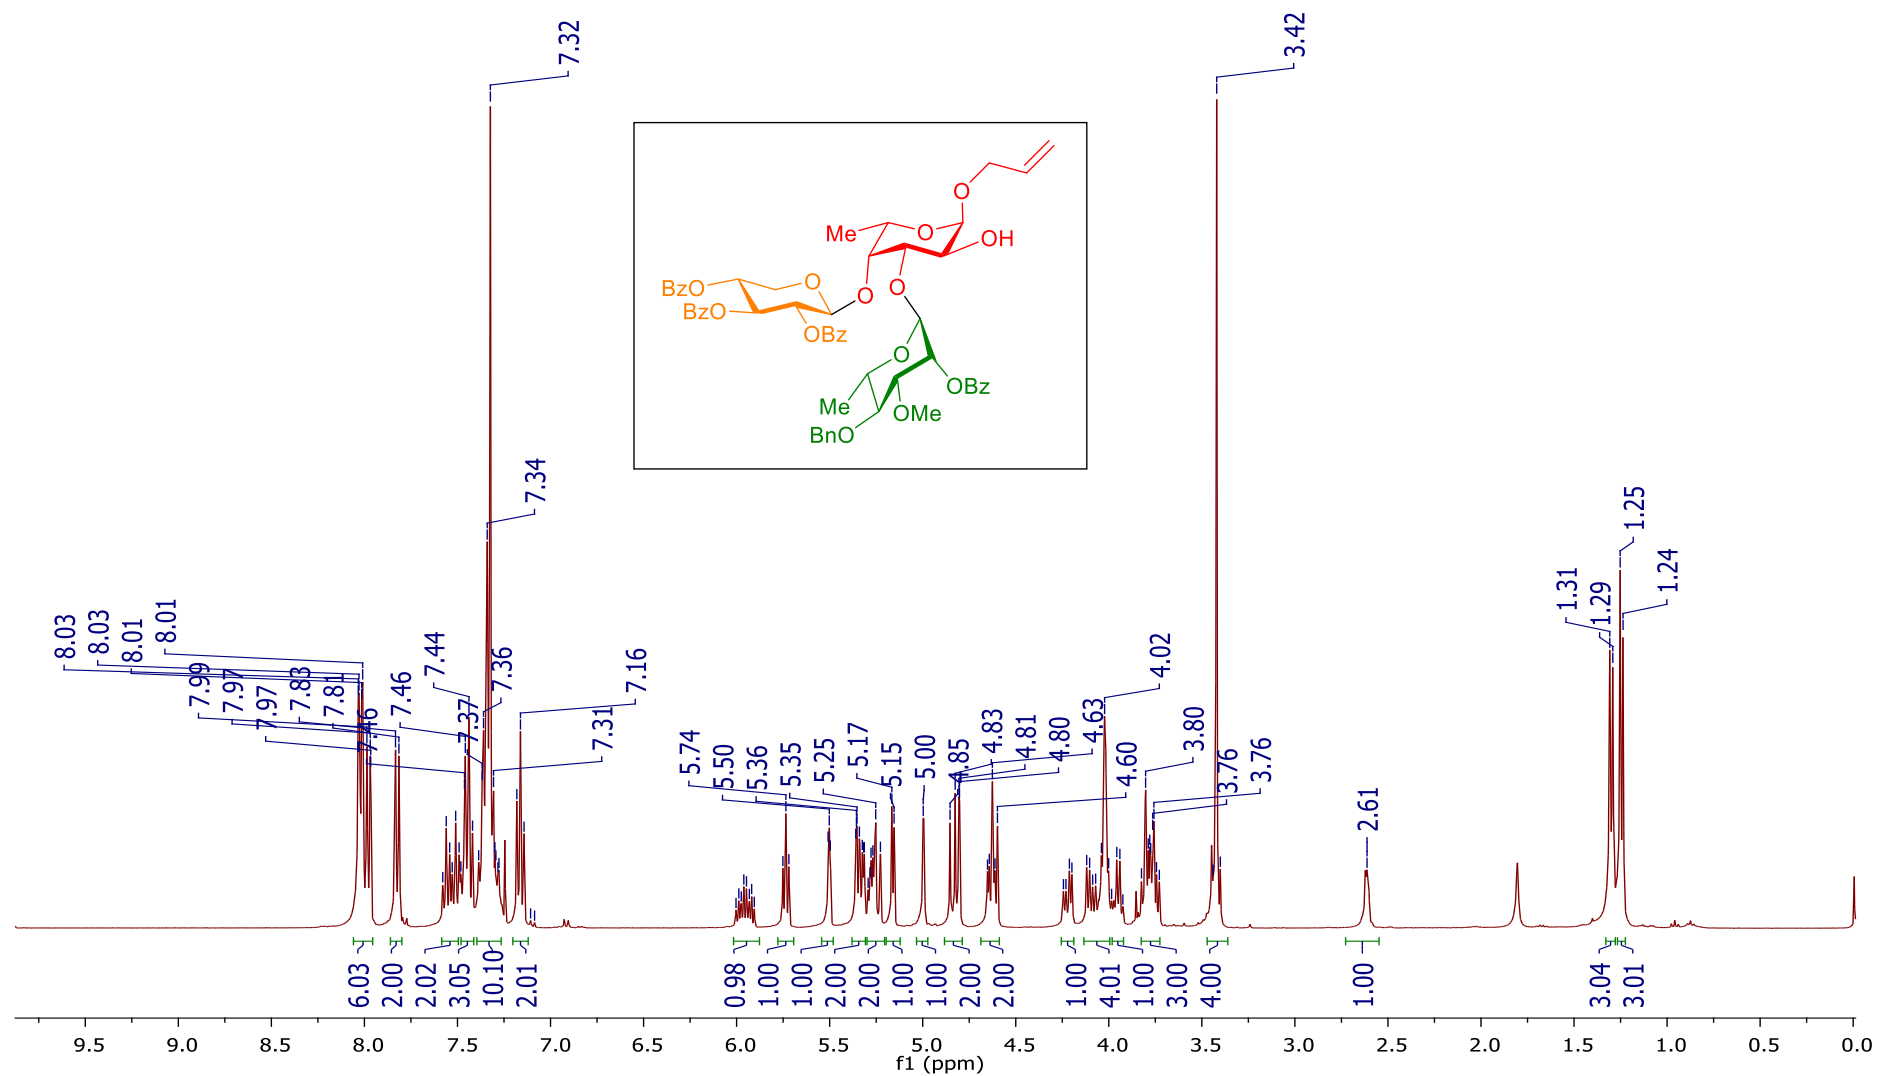

$^{13}\text{C}$  NMR Spectrum (100.67MHz,  $\text{CDCl}_3$ ) of compound **26**

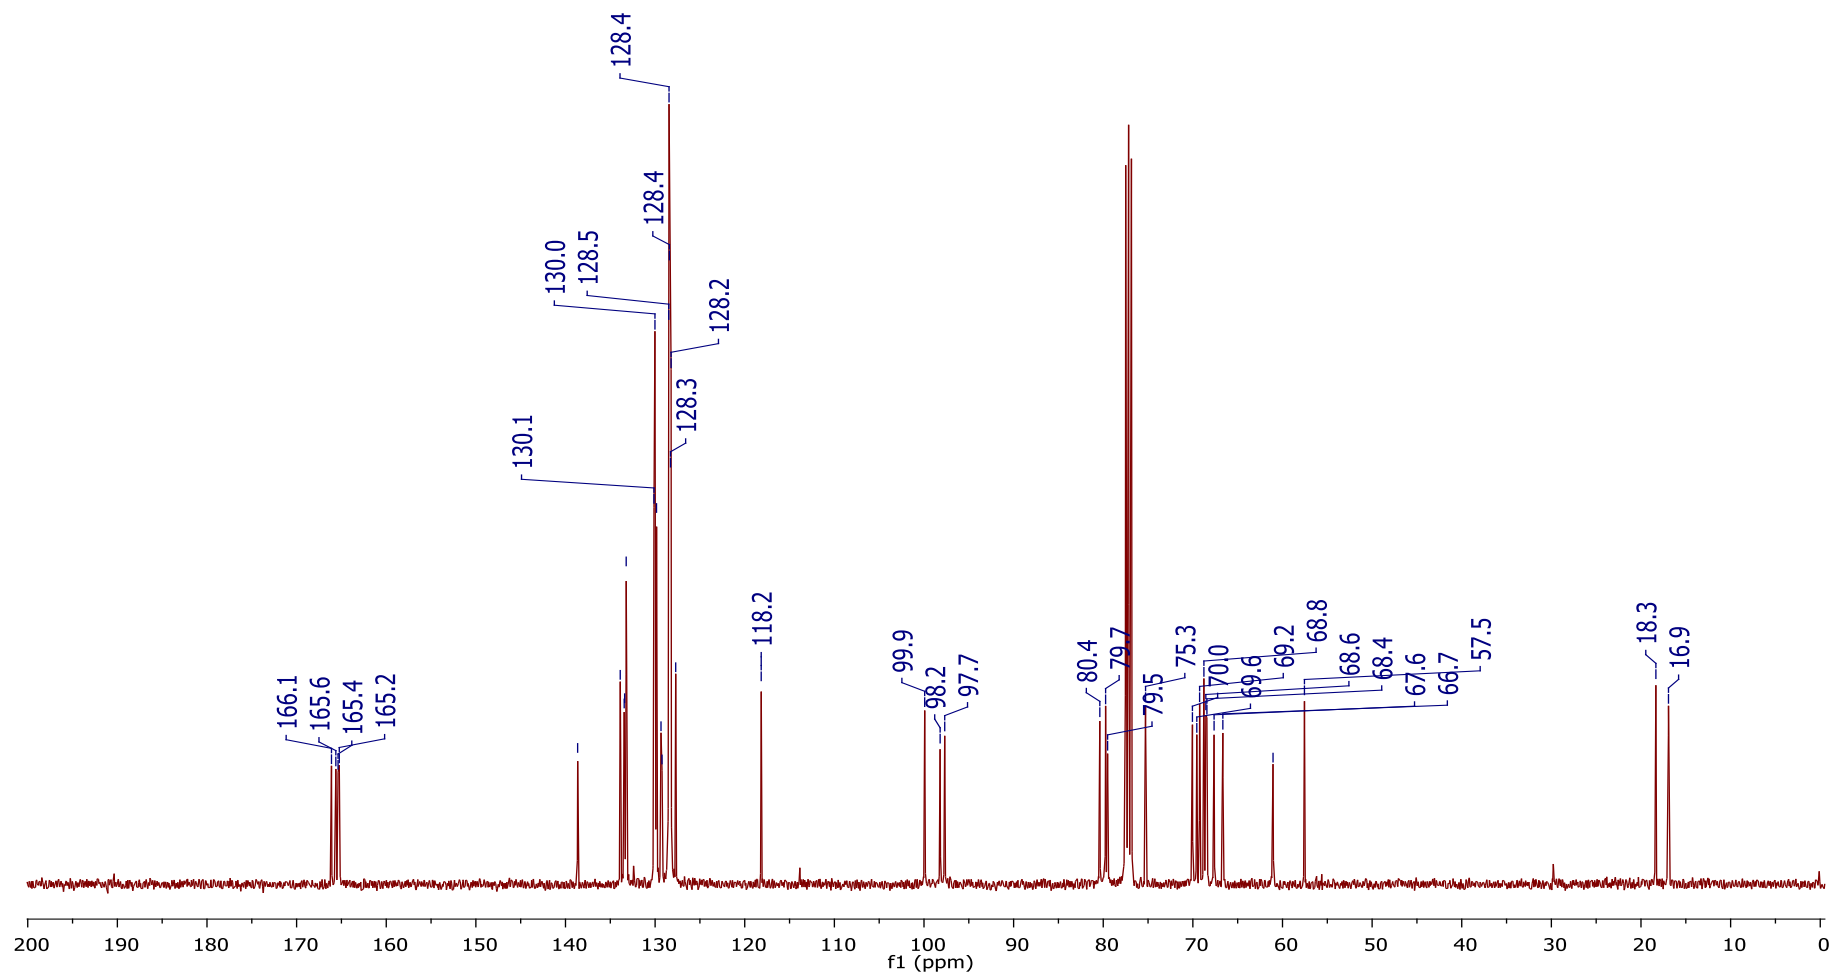

DEPT NMR Spectrum (100.67MHz, CDCl<sub>3</sub>) of compound **26**

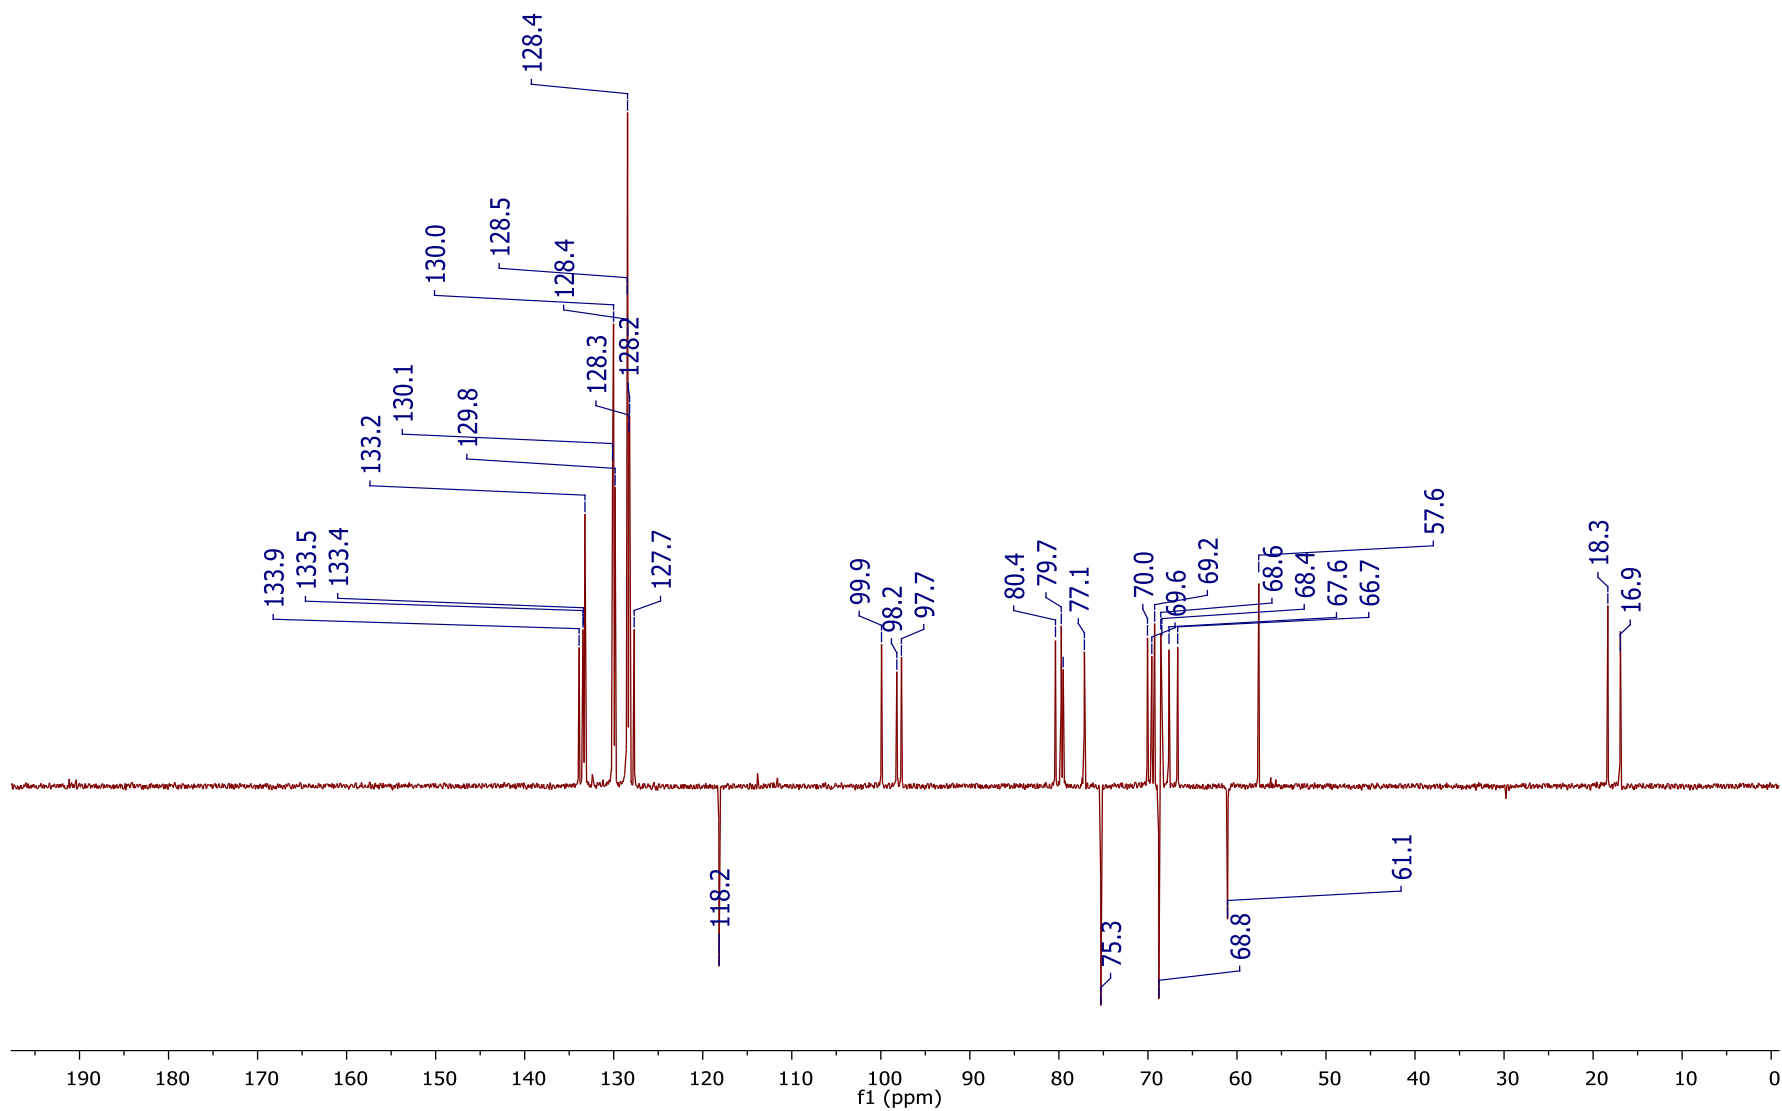

Supplement: d0ob02176h1.pdf [file d0ob02176h1.pdf]
